# Supplementary material for: Coumarinolignans with Reactive Oxygen Species (ROS) and NF-κB Inhibitory Activities from the Roots of Waltheria indica
Source: MDPI journal article supplement (doi:10.3390/molecules27103270), 2022-05-19
Supplement: s1 [file s1]

# Coumarinolignans with Reactive Oxygen Species (ROS) and NF- $\kappa$ B Inhibitory Activities from the Roots of *Waltheria indica*

Feifei Liu <sup>1,2</sup>, Sudipta Mallick <sup>1,†</sup>, Timothy J. O'Donnell <sup>3,†</sup>, Ruxianguli Rouzimaimaiti <sup>1</sup>, Yuheng Luo <sup>3</sup>, Rui Sun <sup>3</sup>, Marisa Wall <sup>4</sup>, Supakit Wongwiwatthananut <sup>5</sup>, Abhijit Date <sup>1,6</sup>, Dane Kaohelani Silva <sup>7</sup>, Philip G. Williams <sup>3</sup> and Leng Chee Chang <sup>1,\*</sup>

<sup>1</sup> Department of Pharmaceutical Sciences, Daniel K. Inouye College of Pharmacy, University of Hawai'i at Hilo, Hilo, HI 96720, USA; feifeiliu@jsnu.edu.cn (F.L.); sudipta1787@gmail.com (S.M.); ruxian.love@163.com (R.R.); dateabhi@hawaii.edu (A.D.)

<sup>2</sup> School of Life Sciences, Jiangsu Normal University, Xuzhou 221116, China

<sup>3</sup> Department of Chemistry, 2545 McCarthy Mall, University of Hawai'i at Manoa, Honolulu, HI 96822, USA; tjod@hawaii.edu (T.J.O.); yuheng@hawaii.edu (Y.L.); ruisun@hawaii.edu (R.S.); philipwi@hawaii.edu (P.G.W.)

<sup>4</sup> Daniel K. Inouye U.S. Pacific Basin Agricultural Research Center, USDA-ARS, Hilo, HI 96720, USA; marisa.wall@usda.gov

<sup>5</sup> Department of Pharmacy Practice, Daniel K. Inouye College of Pharmacy, University of Hawai'i at Hilo, Hilo, HI 96720, USA; supakit@hawaii.edu

<sup>6</sup> Department of Pharmacology and Toxicology, R. K. Coit College of Pharmacy, University of Arizona, Tucson, AZ 85715, USA.

<sup>7</sup> Hale Ola Pono, LLC, Keaau, HI 96749, USA; lomidoc@gmail.com

\* Correspondence: lengchee@hawaii.edu; Tel.: +1-(808)-981-8018

† These authors contributed equally to this work.

## Contents

|                                                                                                            |    |
|------------------------------------------------------------------------------------------------------------|----|
| Figure S1. HRESI-MS spectrum of the new compound <b>1a</b> .....                                           | 1  |
| Figure S2. IR spectrum of the new compound <b>1a</b> .....                                                 | 2  |
| Figure S3. <sup>1</sup> H NMR (400 MHz, CDCl <sub>3</sub> ) spectrum of the new compound <b>1a</b> .....   | 3  |
| Figure S4. <sup>13</sup> C NMR (100 MHz, CDCl <sub>3</sub> ) spectrum of the new compound <b>1a</b> .....  | 4  |
| Figure S5. HSQC spectrum of the new compound <b>1a</b> .....                                               | 5  |
| Figure S6. HMBC spectrum of the new compound <b>1a</b> .....                                               | 6  |
| Figure S7. COSY spectrum of the new compound <b>1a</b> .....                                               | 7  |
| Figure S8. NOESY spectrum of the new compound <b>1a</b> .....                                              | 8  |
| Figure S9. HRESI-MS spectrum of the new compound <b>1b</b> .....                                           | 9  |
| Figure S10. IR spectrum of the new compound <b>1b</b> .....                                                | 10 |
| Figure S11. <sup>1</sup> H NMR (400 MHz, CDCl <sub>3</sub> ) spectrum of the new compound <b>1b</b> .....  | 11 |
| Figure S12. <sup>13</sup> C NMR (100 MHz, CDCl <sub>3</sub> ) spectrum of the new compound <b>1b</b> ..... | 12 |
| Figure S13. HSQC spectrum of the new compound <b>1b</b> .....                                              | 13 |
| Figure S14. HMBC spectrum of the new compound <b>1b</b> .....                                              | 14 |
| Figure S15. COSY spectrum of the new compound <b>1b</b> .....                                              | 15 |
| Figure S16. NOESY spectrum of the new compound <b>1b</b> .....                                             | 16 |
| Figure S17. HRESI-MS spectrum of the new compound <b>2</b> .....                                           | 17 |

|                                                                                                               |    |
|---------------------------------------------------------------------------------------------------------------|----|
| Figure S18. IR spectrum of the new compound <b>2</b> .....                                                    | 18 |
| Figure S19. <sup>1</sup> H NMR (400 MHz, MeOD) spectrum of the new compound <b>2</b> .....                    | 19 |
| Figure S20. <sup>13</sup> C NMR (100 MHz, MeOD) spectrum of the new compound <b>2</b> .....                   | 20 |
| Figure S21. HSQC spectrum of the new compound <b>2</b> .....                                                  | 21 |
| Figure S22. HMBC spectrum of the new compound <b>2</b> .....                                                  | 22 |
| Figure S23. COSY spectrum of the new compound <b>2</b> .....                                                  | 23 |
| Figure S24. NOESY spectrum of the new compound <b>2</b> .....                                                 | 24 |
| Figure S25. Images of conformers (>1%) for the new compound <b>2</b> .....                                    | 25 |
| Figure S26. CD spectrum (experimental to calculated comparison by SpecDis) of the new compound <b>2</b> ..... | 26 |
| Figure S27. HRESI-MS spectrum of the new compound <b>3</b> .....                                              | 27 |
| Figure S28. IR spectrum of the new compound <b>3</b> .....                                                    | 28 |
| Figure S29. <sup>1</sup> H NMR (400 MHz, CDCl <sub>3</sub> ) spectrum of the new compound <b>3</b> .....      | 29 |
| Figure S30. <sup>13</sup> C NMR (100 MHz, CDCl <sub>3</sub> ) spectrum of the new compound <b>3</b> .....     | 30 |
| Figure S31. HSQC spectrum of the new compound <b>3</b> .....                                                  | 31 |
| Figure S32. HMBC spectrum of the new compound <b>3</b> .....                                                  | 32 |
| Figure S33. COSY spectrum of the new compound <b>3</b> .....                                                  | 33 |
| Figure S34. NOESY spectrum of the new compound <b>3</b> .....                                                 | 34 |
| Figure S35. Images of conformers (>1%) for the new compound <b>3</b> .....                                    | 35 |

|                                                                                                               |    |
|---------------------------------------------------------------------------------------------------------------|----|
| Figure S36. CD spectrum (experimental to calculated comparison by SpecDis) of the new compound <b>3</b> ..... | 36 |
| Figure S37. HRESI-MS spectrum of the new compound <b>4</b> .....                                              | 37 |
| Figure S38. IR spectrum of the new compound <b>4</b> .....                                                    | 38 |
| Figure S39. $^1\text{H}$ NMR (400 MHz, MeOD) spectrum of the new compound <b>4</b> .....                      | 39 |
| Figure S40. $^{13}\text{C}$ NMR (100 MHz, MeOD) spectrum of the new compound <b>4</b> .....                   | 40 |
| Figure S41. HSQC spectrum of the new compound <b>4</b> .....                                                  | 41 |
| Figure S42. HMBC spectrum of the new compound <b>4</b> .....                                                  | 42 |
| Figure S43. COSY spectrum of the new compound <b>4</b> .....                                                  | 43 |
| Figure S44. NOESY spectrum of the new compound <b>4</b> .....                                                 | 44 |
| Figure S45. HRESI-MS spectrum of the new compound <b>5</b> .....                                              | 45 |
| Figure S46. IR spectrum of the new compound <b>5</b> .....                                                    | 46 |
| Figure S47. $^1\text{H}$ NMR (400 MHz, $\text{CDCl}_3$ ) spectrum of the new compound <b>5</b> .....          | 47 |
| Figure S48. $^{13}\text{C}$ NMR (100 MHz, $\text{CDCl}_3$ ) spectrum of the new compound <b>5</b> .....       | 48 |
| Figure S49. HSQC spectrum of the new compound <b>5</b> .....                                                  | 49 |
| Figure S50. HMBC spectrum of the new compound <b>5</b> .....                                                  | 50 |
| Figure S51. COSY spectrum of the new compound <b>5</b> .....                                                  | 51 |
| Figure S52. NOESY spectrum of the new compound <b>5</b> .....                                                 | 52 |
| Figure S53. HRESI-MS spectrum of the new compound <b>7</b> .....                                              | 53 |

|                                                                                                         |    |
|---------------------------------------------------------------------------------------------------------|----|
| Figure S54. IR spectrum of the new compound <b>7</b> .....                                              | 54 |
| Figure S55. $^1\text{H}$ NMR (400 MHz, $\text{CDCl}_3$ ) spectrum of the new compound <b>7</b> .....    | 55 |
| Figure S56. $^{13}\text{C}$ NMR (100 MHz, $\text{CDCl}_3$ ) spectrum of the new compound <b>7</b> ..... | 56 |
| Figure S57. HSQC spectrum of the new compound <b>7</b> .....                                            | 57 |
| Figure S58. HMBC spectrum of the new compound <b>7</b> .....                                            | 58 |
| Figure S59. COSY spectrum of the new compound <b>7</b> .....                                            | 59 |
| Figure S60. NOESY spectrum of the new compound <b>7</b> .....                                           | 60 |
| Figure S61. Images of conformers (>1%) for the new compound <b>7</b> .....                              | 61 |

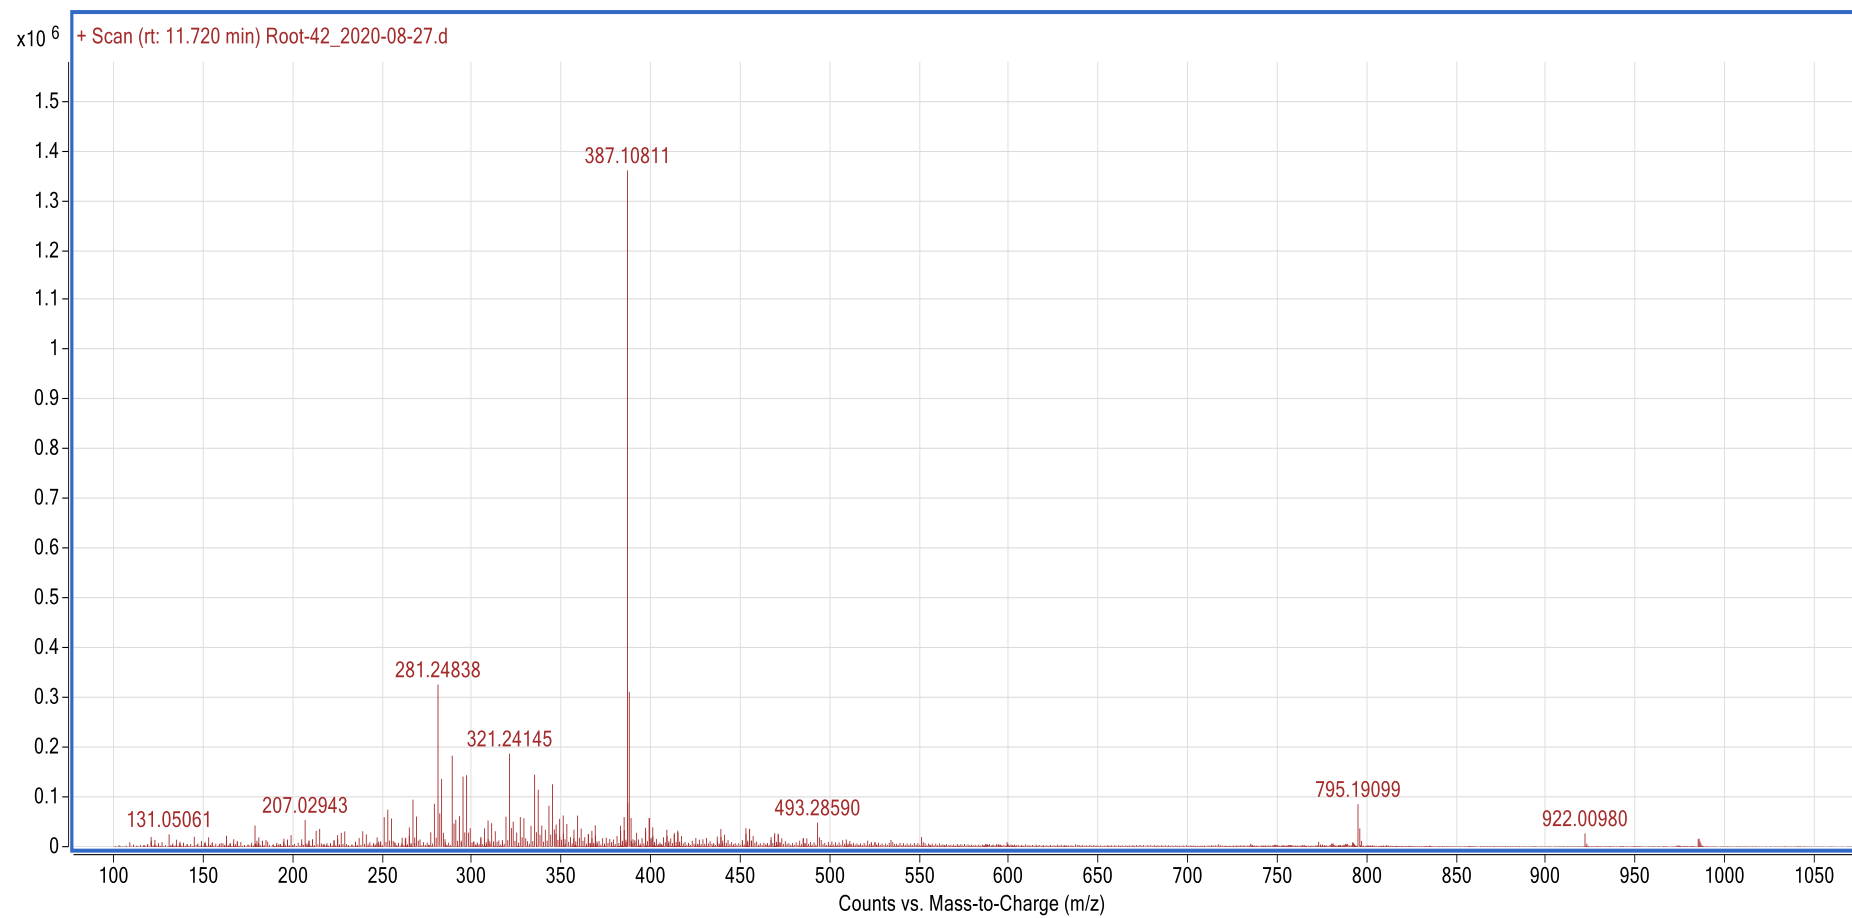

**Figure S1.** HRESI-MS spectrum of the new compound **1a**

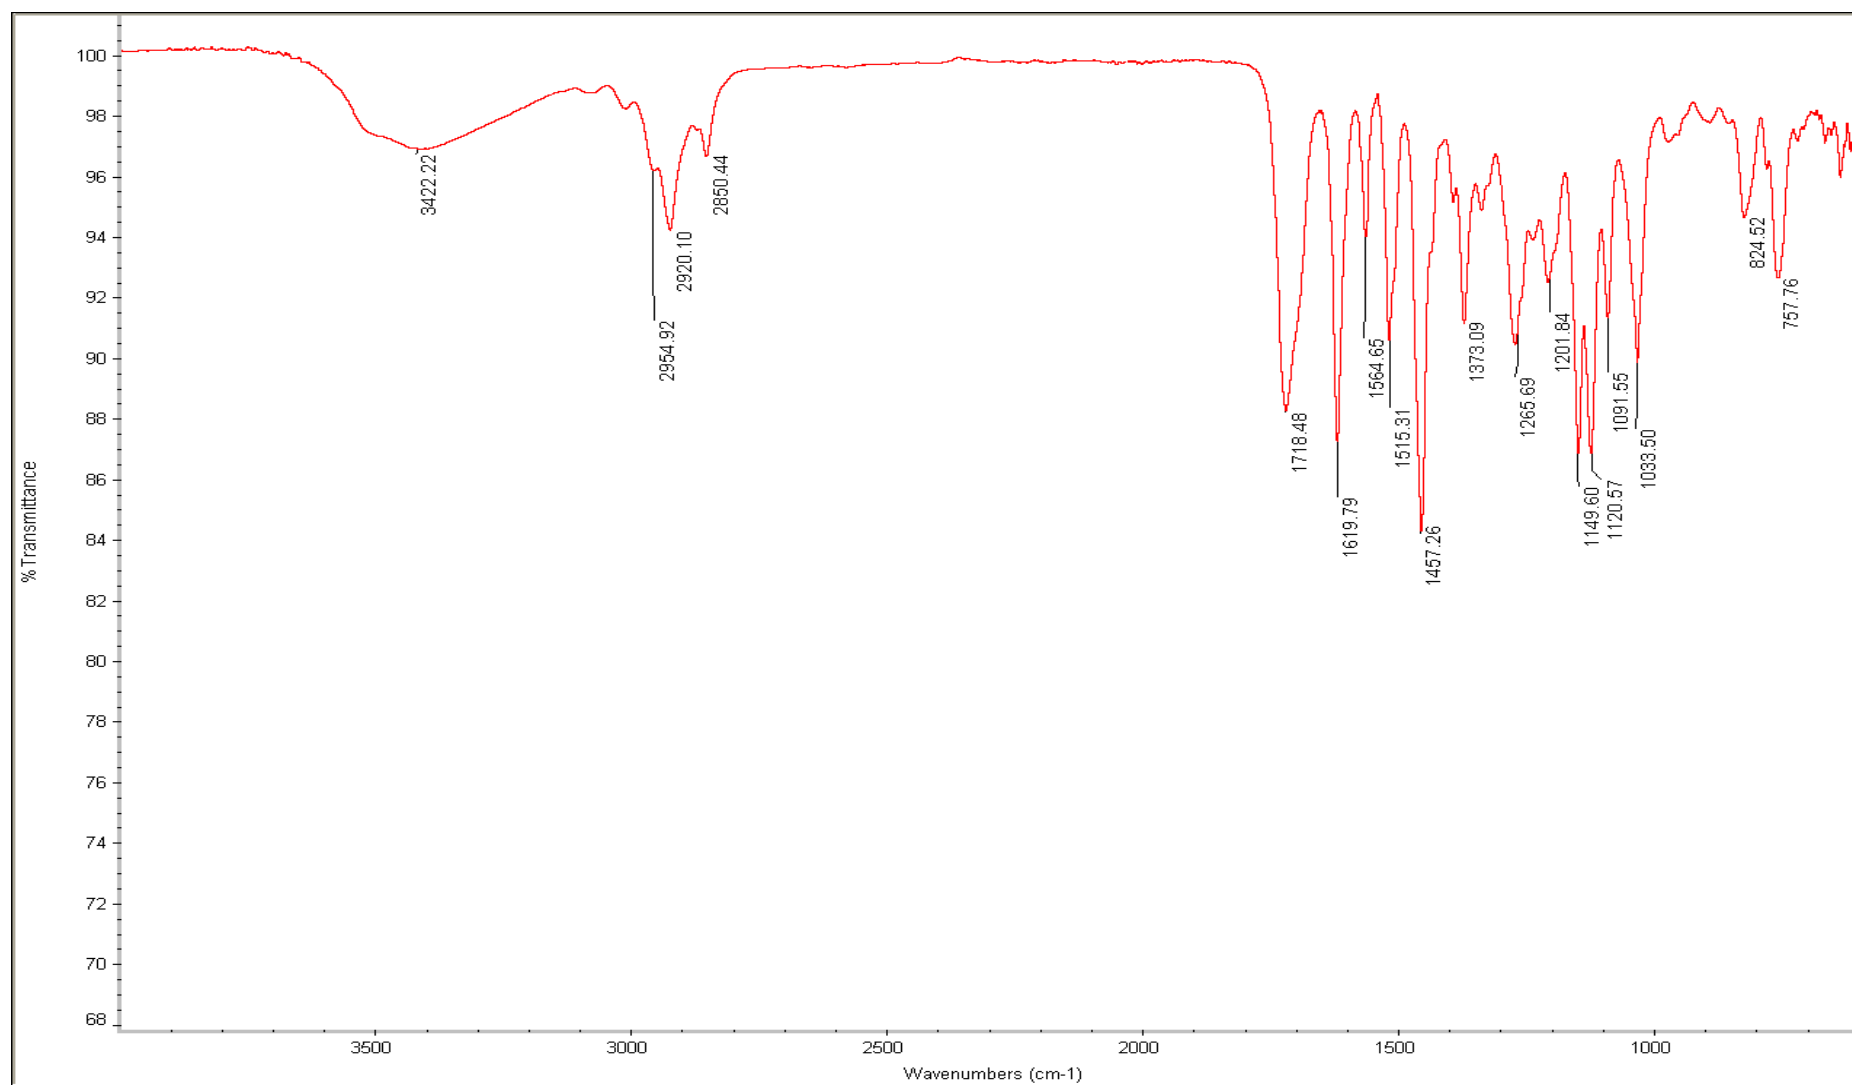

**Figure S2.** IR spectrum of the new compound **1a**

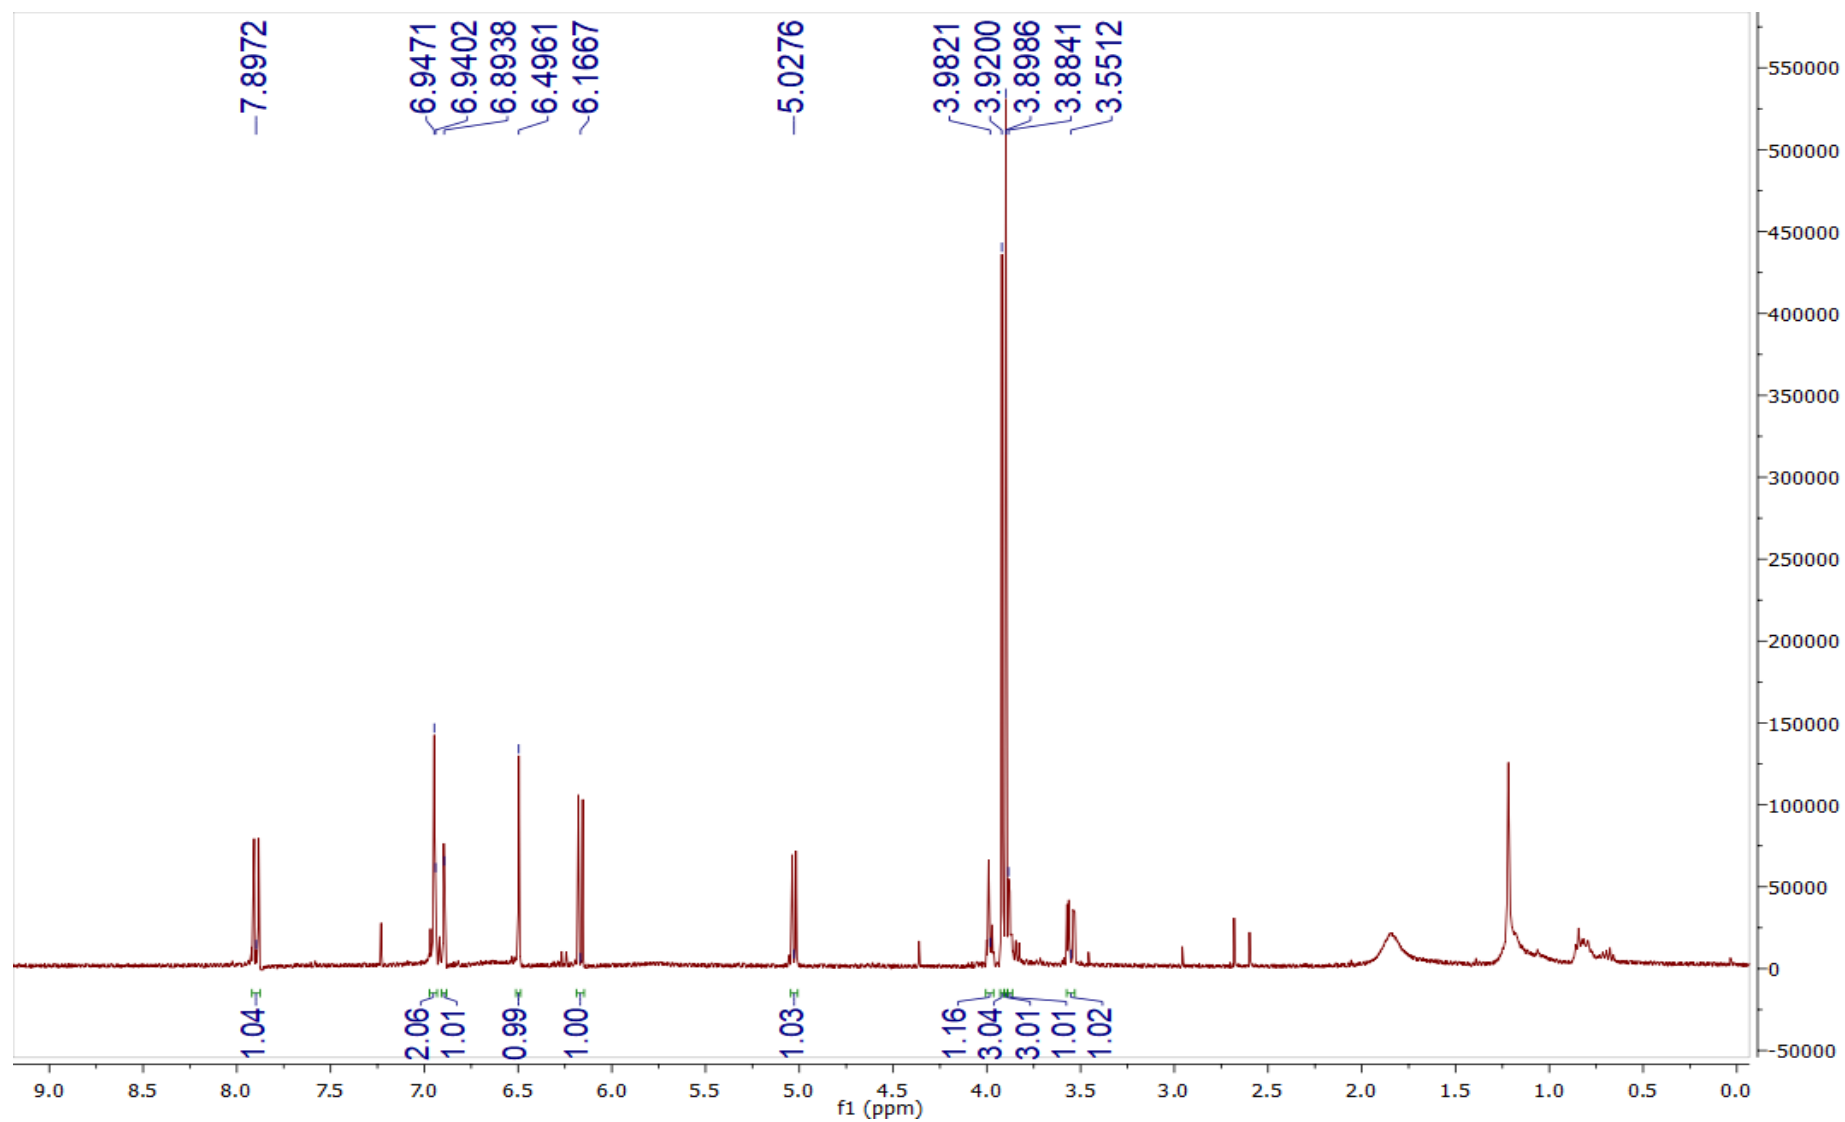

**Figure S3.**  $^1\text{H}$  NMR (400 MHz,  $\text{CDCl}_3$ ) spectrum of the new compound **1a**



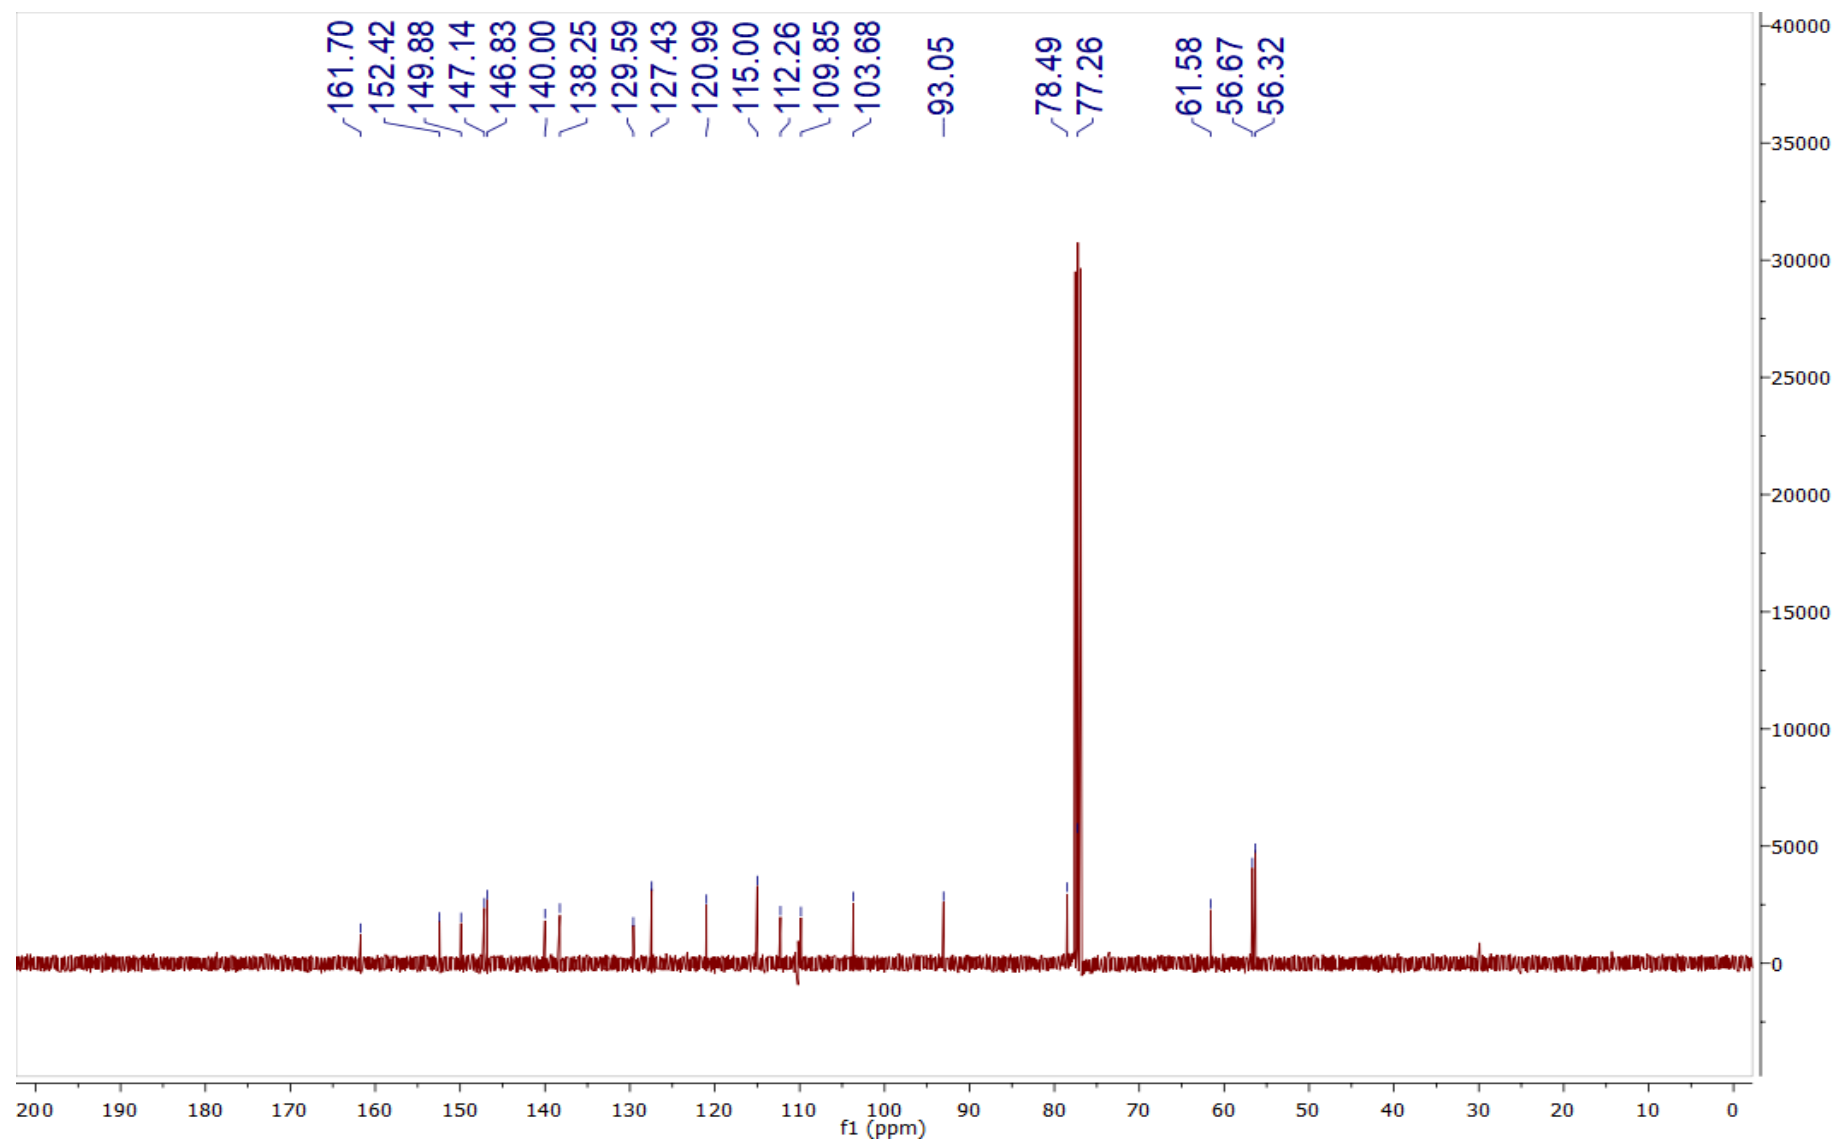

**Figure S4.**  $^{13}\text{C}$  NMR (100 MHz,  $\text{CDCl}_3$ ) spectrum of the new compound **1a**

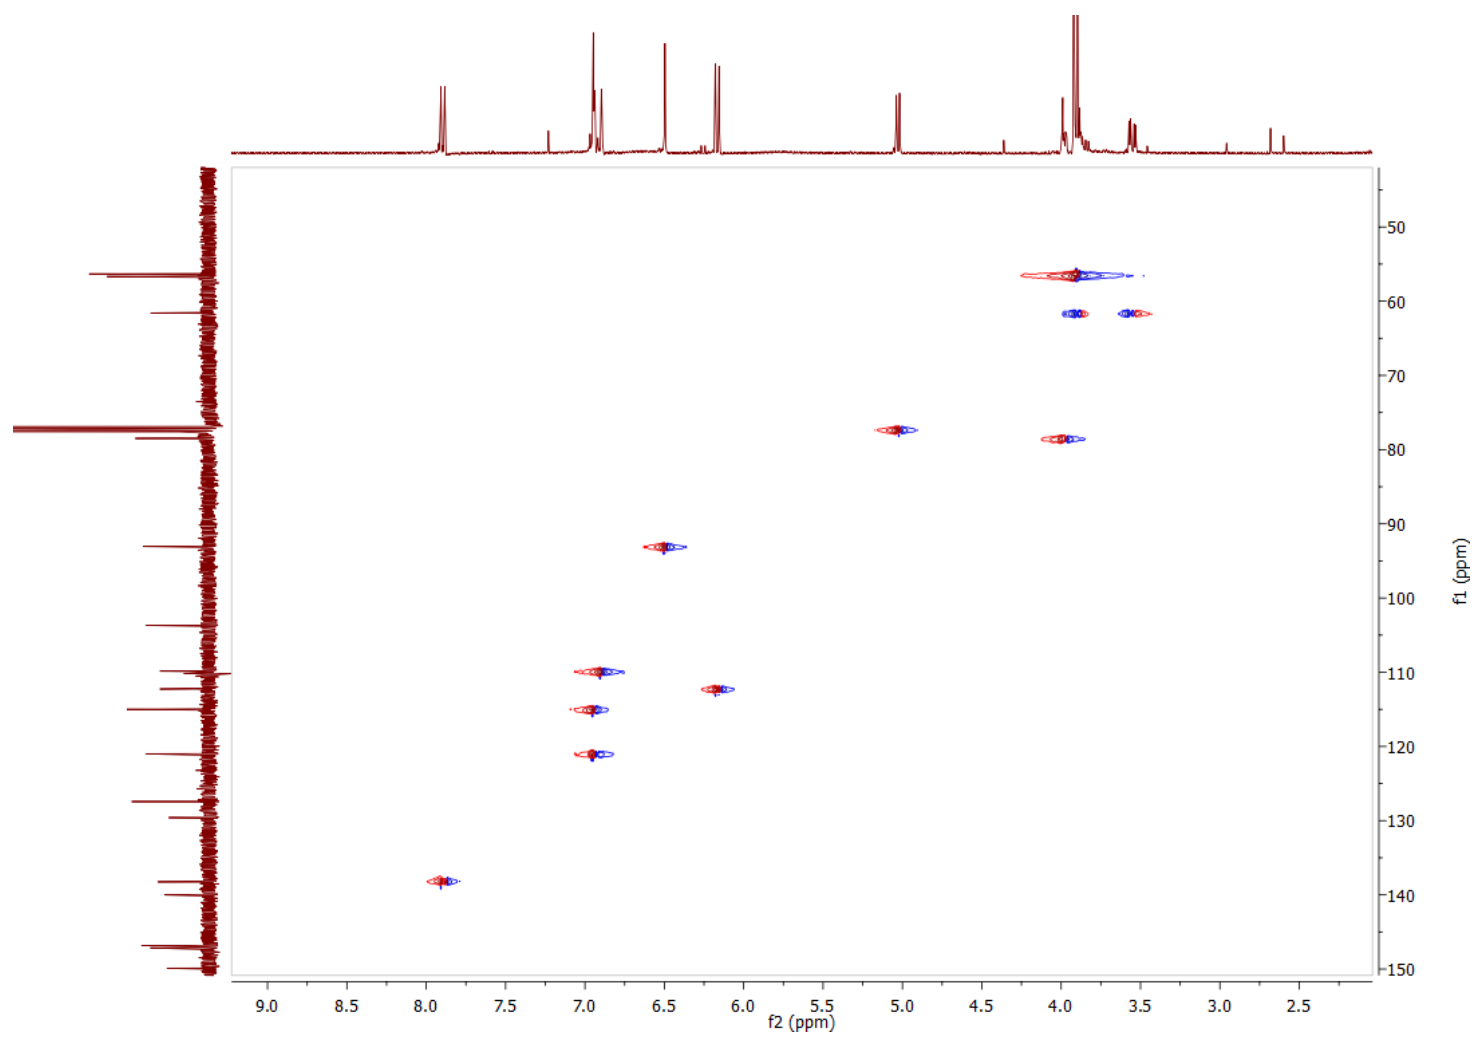

**Figure S5.** HSQC spectrum of the new compound **1a**

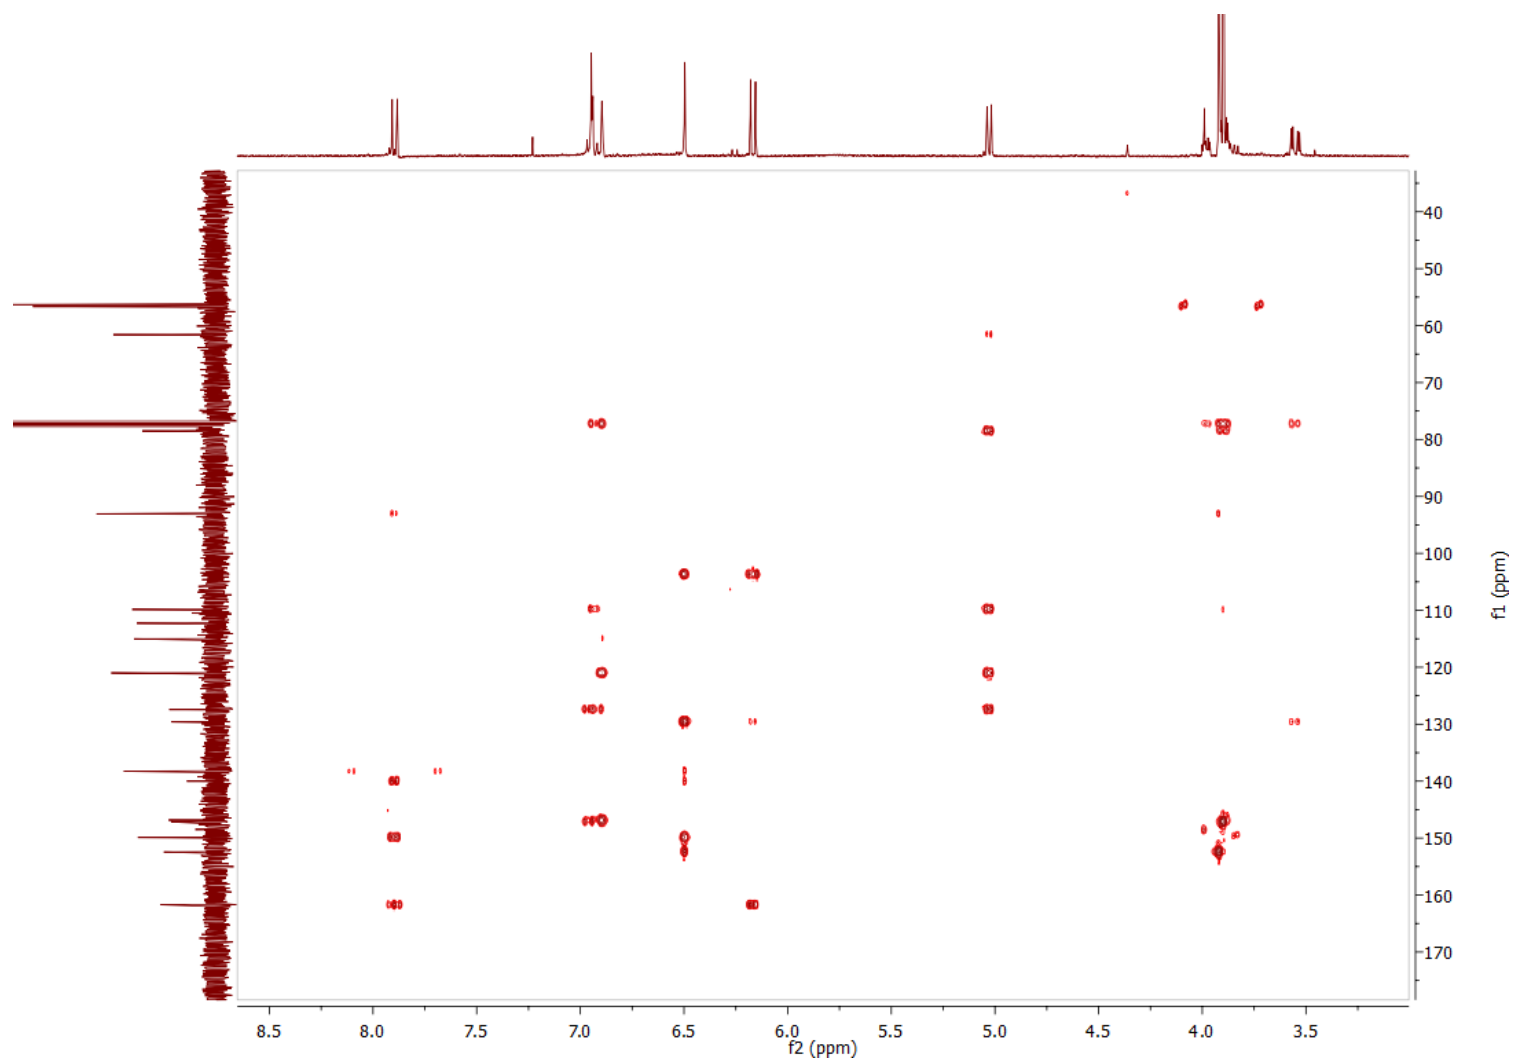

**Figure S6.** HMBC spectrum of the new compound **1a**

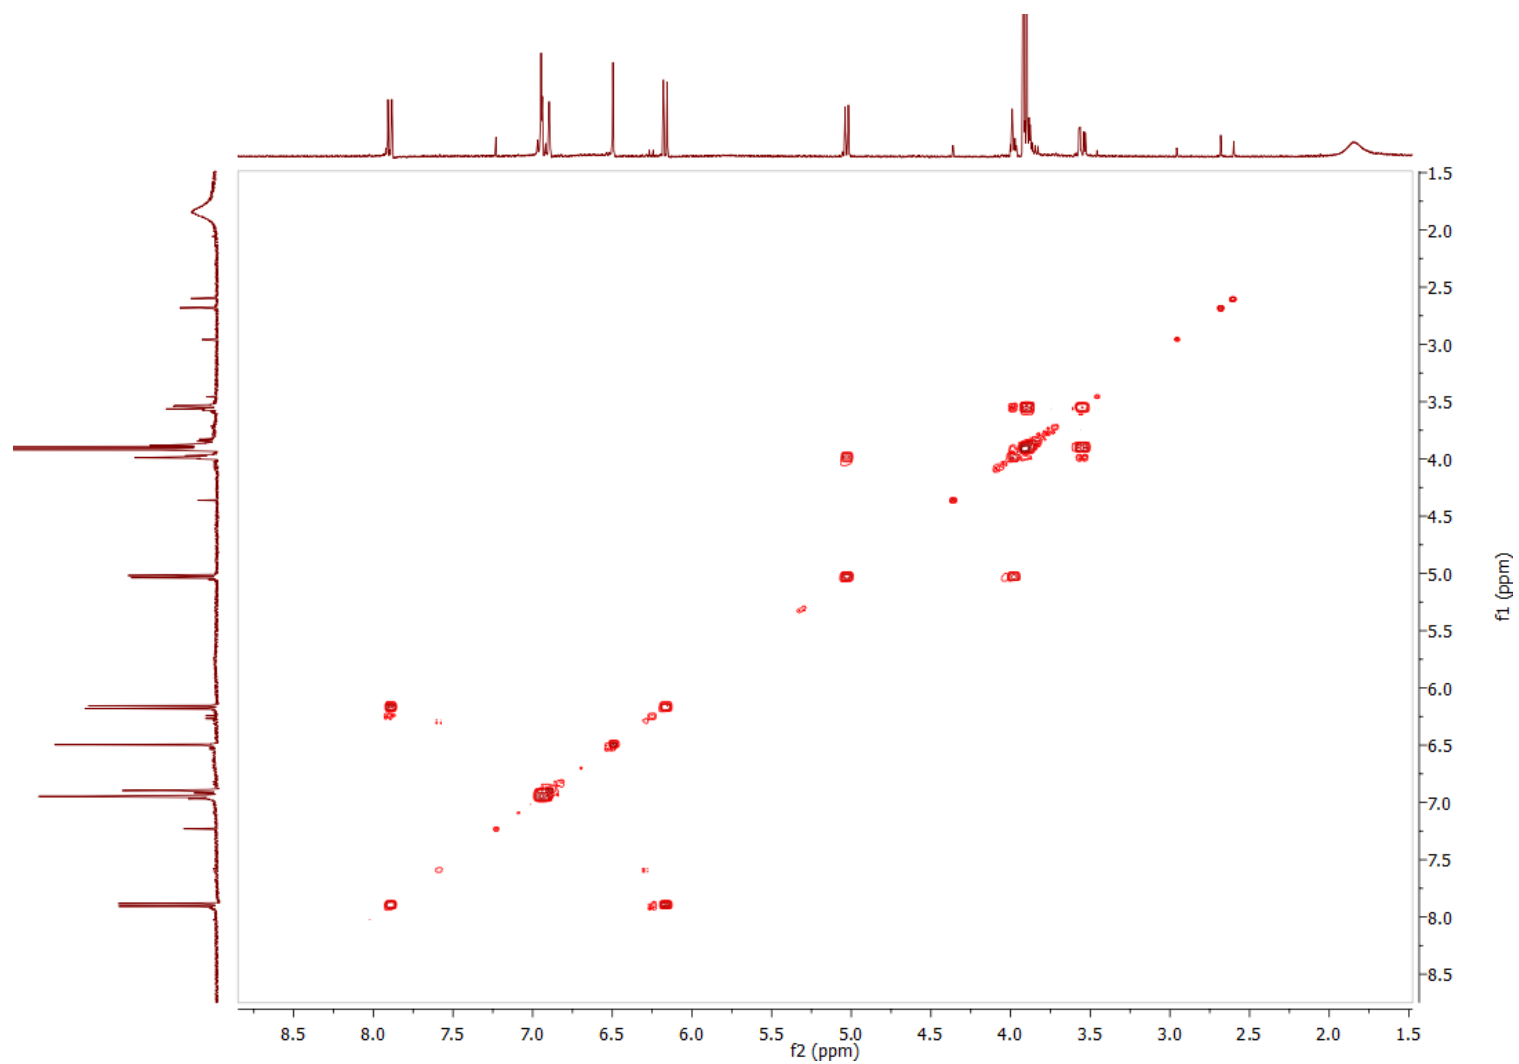

**Figure S7.** COSY spectrum of the new compound **1a**

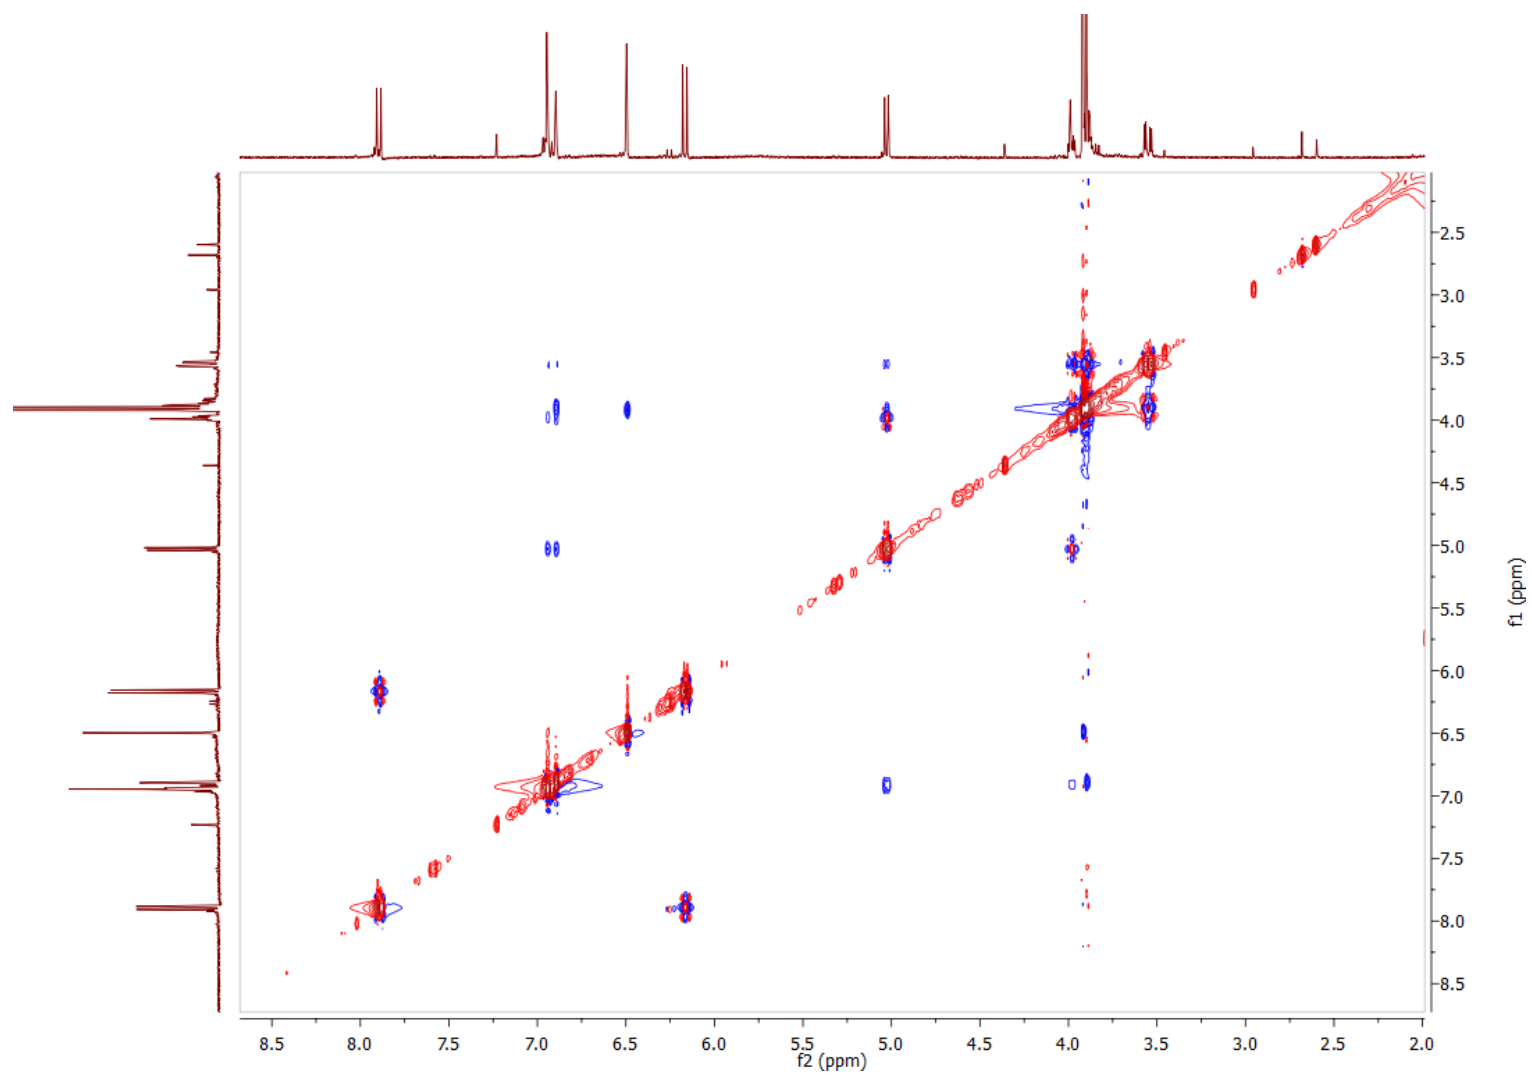

**Figure S8.** NOESY spectrum of the new compound **1a**

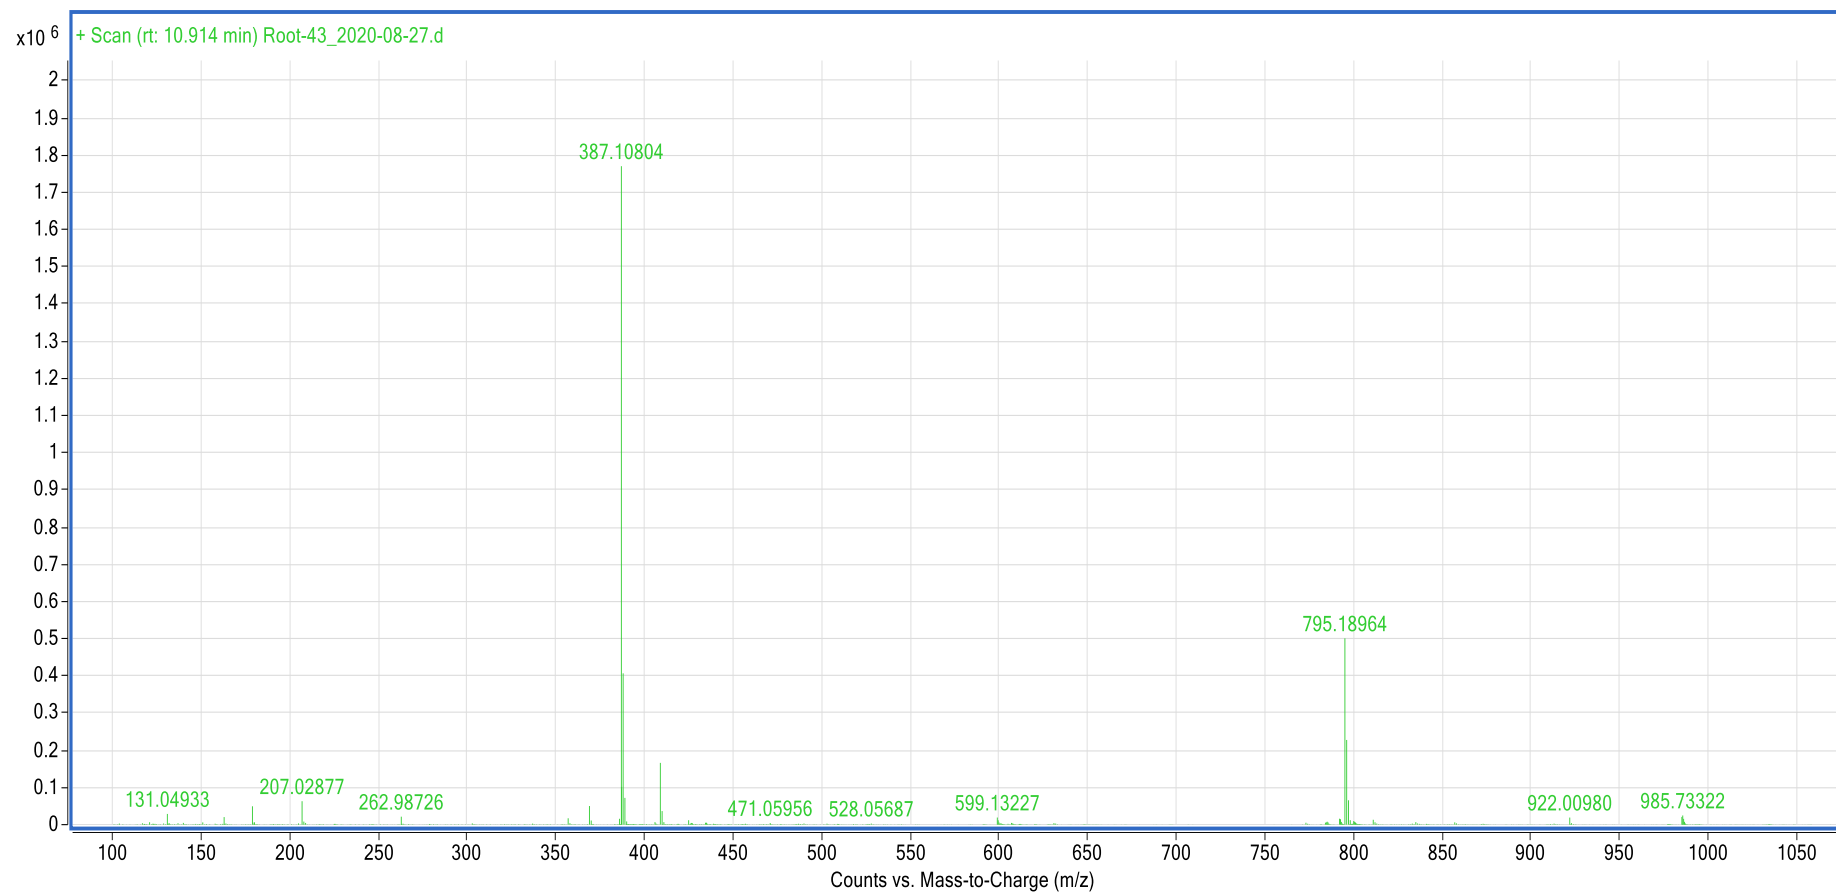

**Figure S9.** HRESI-MS spectrum of the new compound **1b**

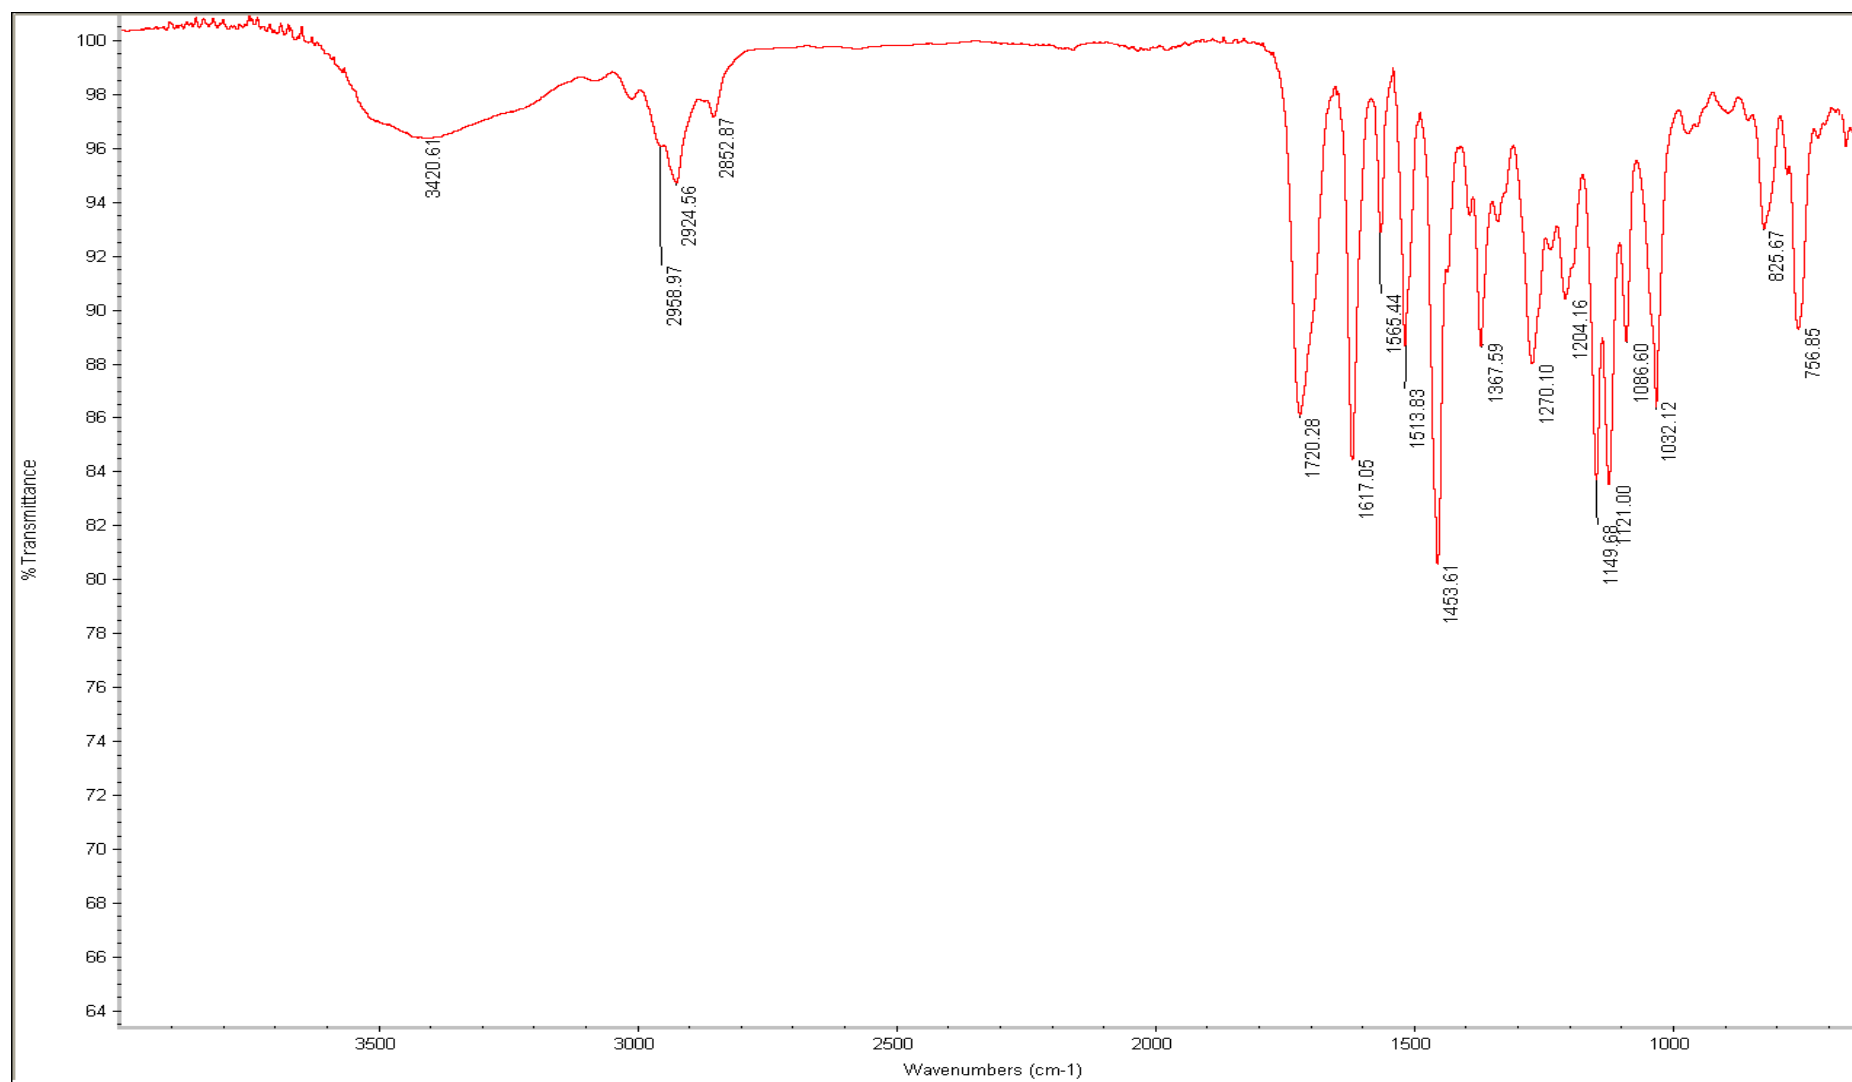

Figure S10. IR spectrum of the new compound **1b**

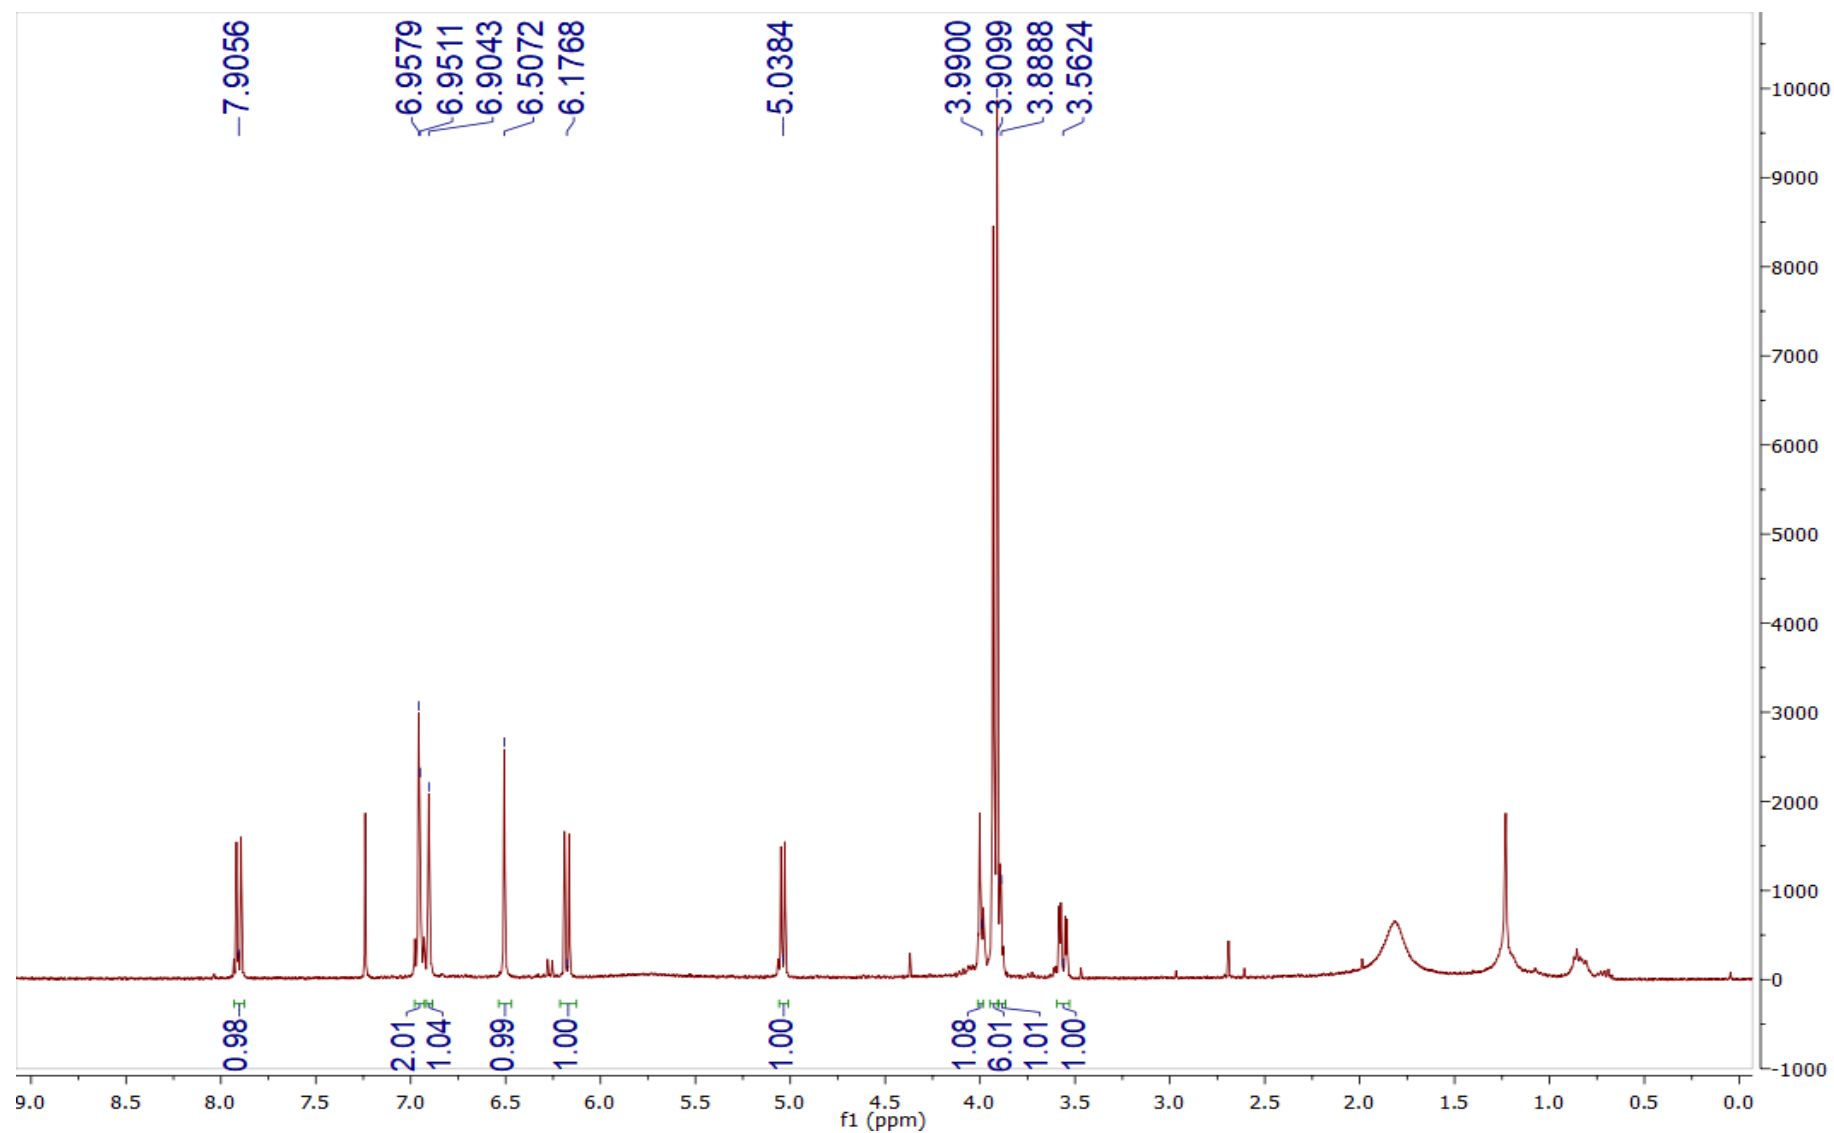

Figure S11.  $^1\text{H}$  NMR (400 MHz,  $\text{CDCl}_3$ ) spectrum of the new compound **1b**



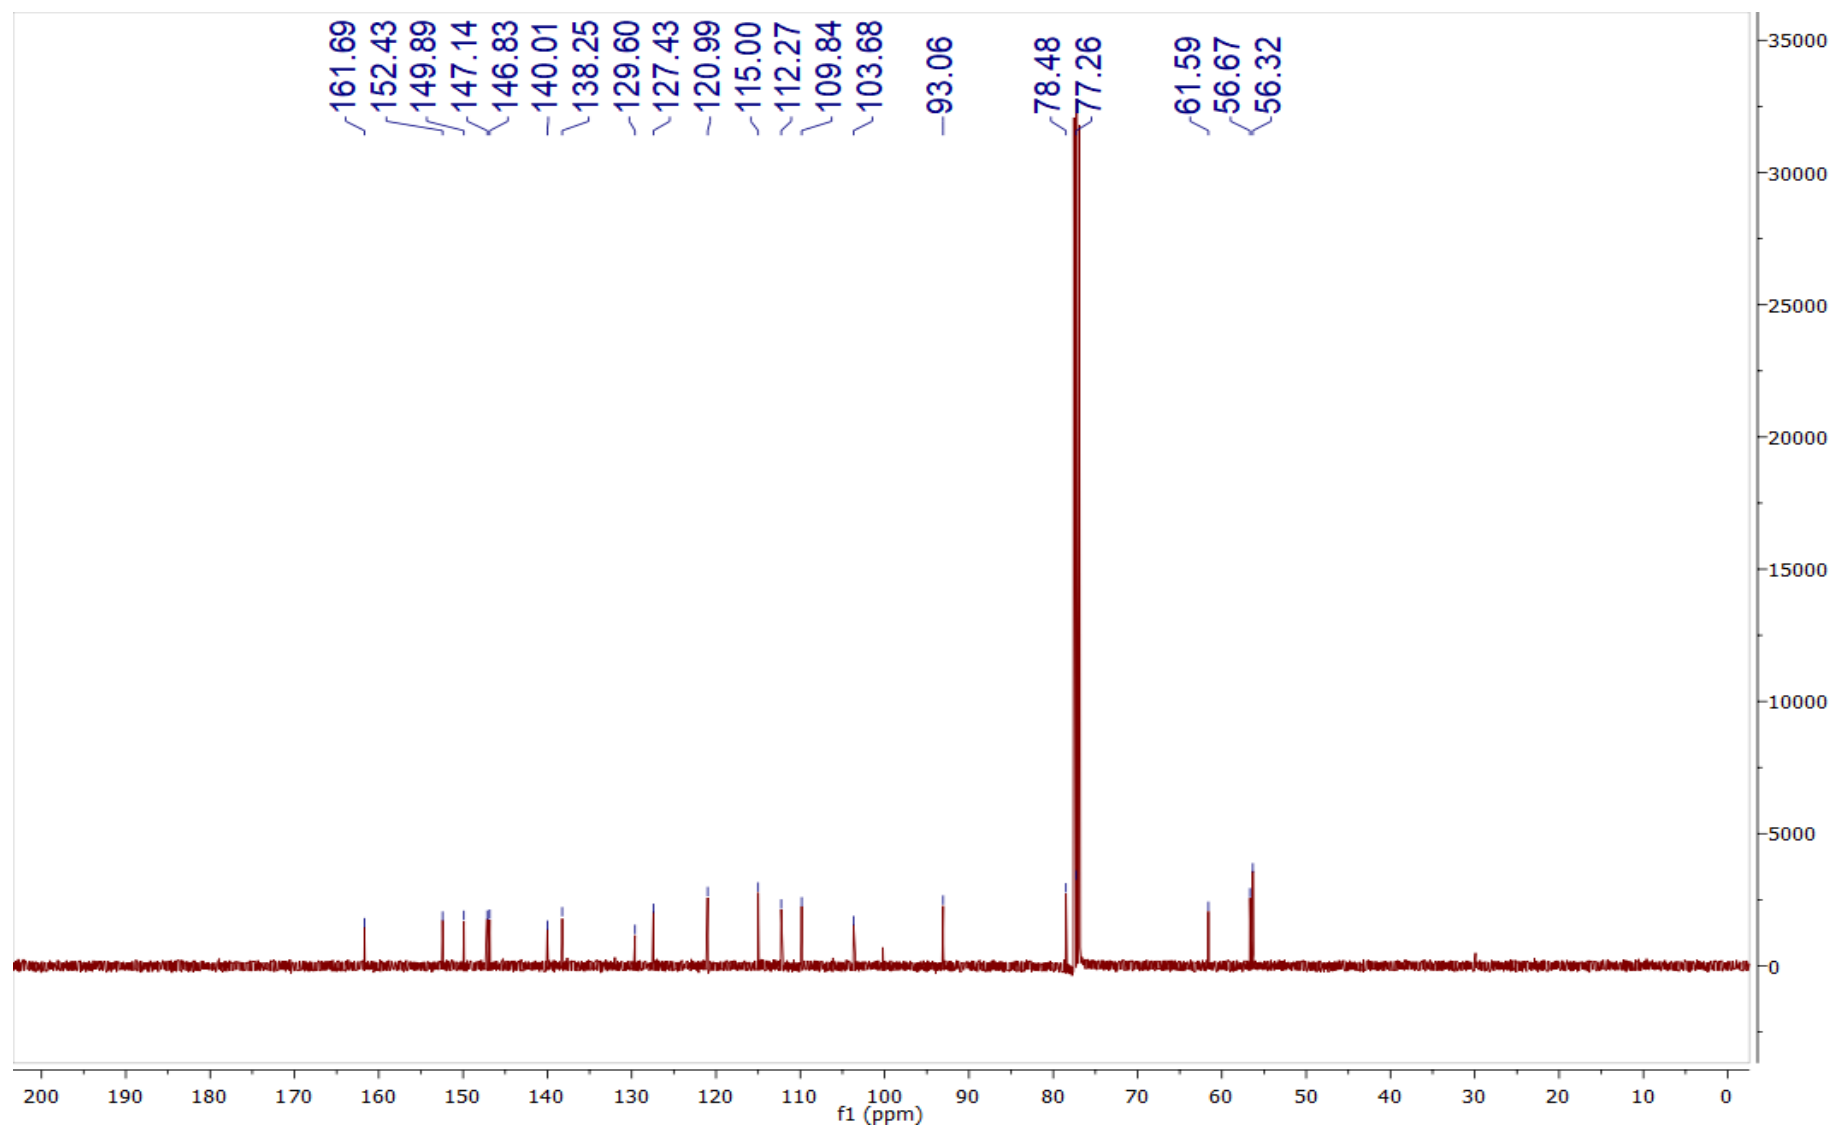

Figure S12. <sup>13</sup>C NMR (100 MHz, CDCl<sub>3</sub>) spectrum of the new compound **1b**

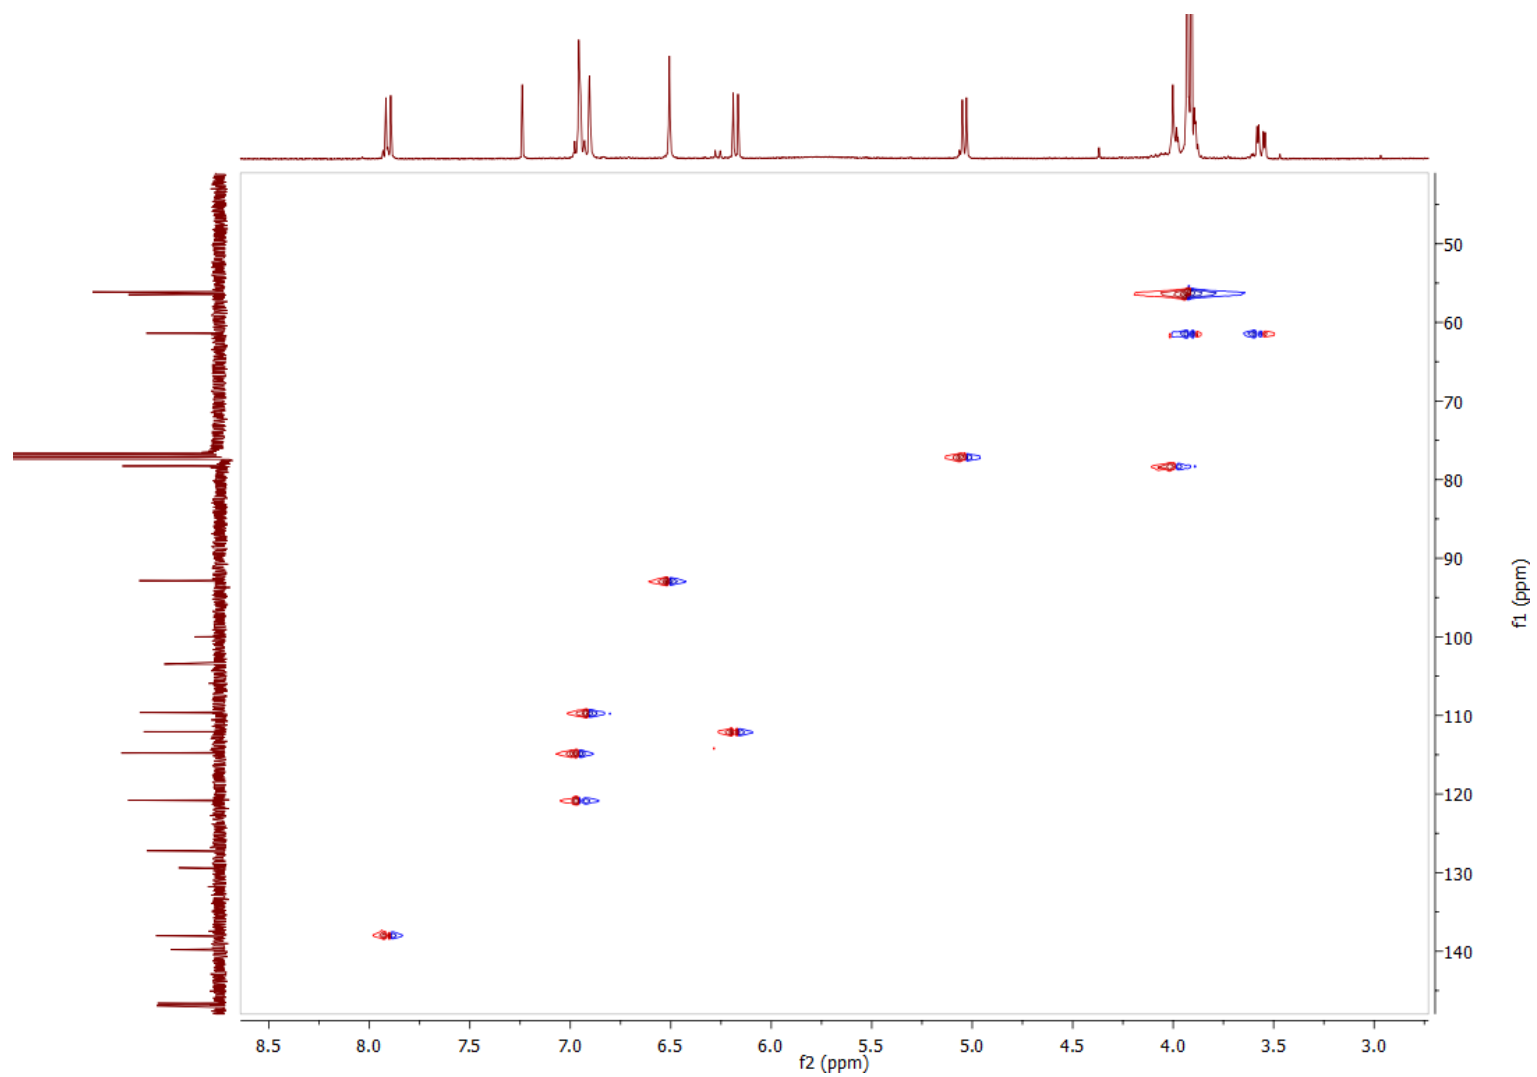

Figure S13. HSQC spectrum of the new compound **1b**

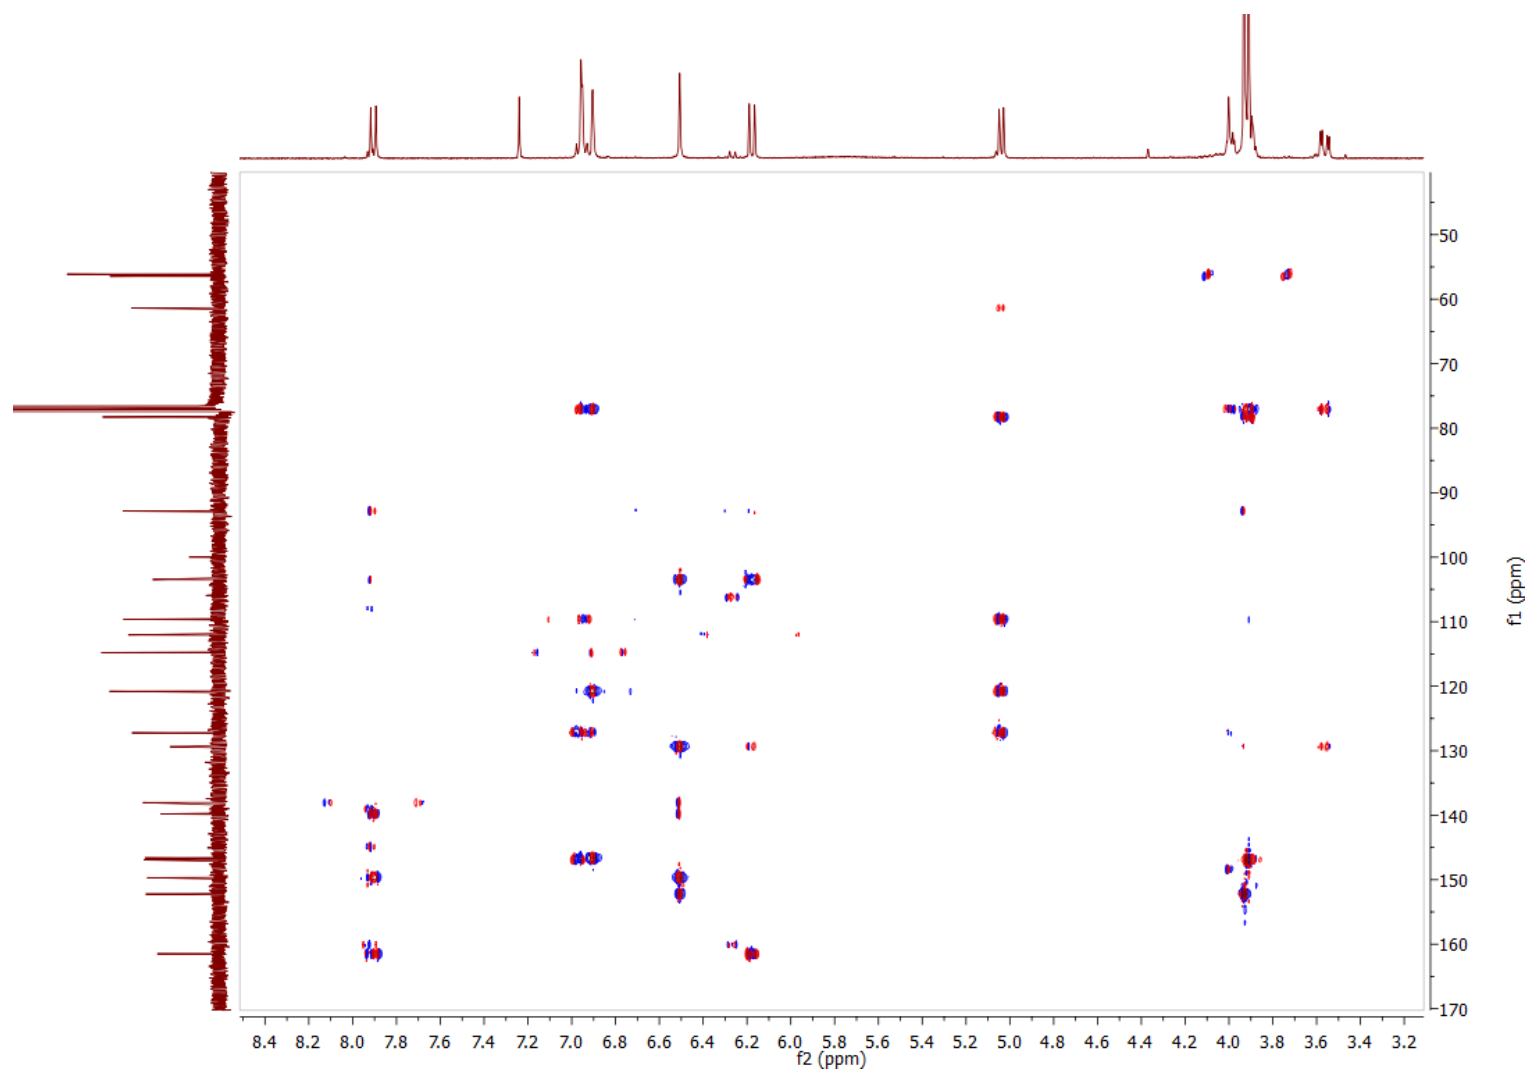

Figure S14. HMBC spectrum of the new compound **1b**

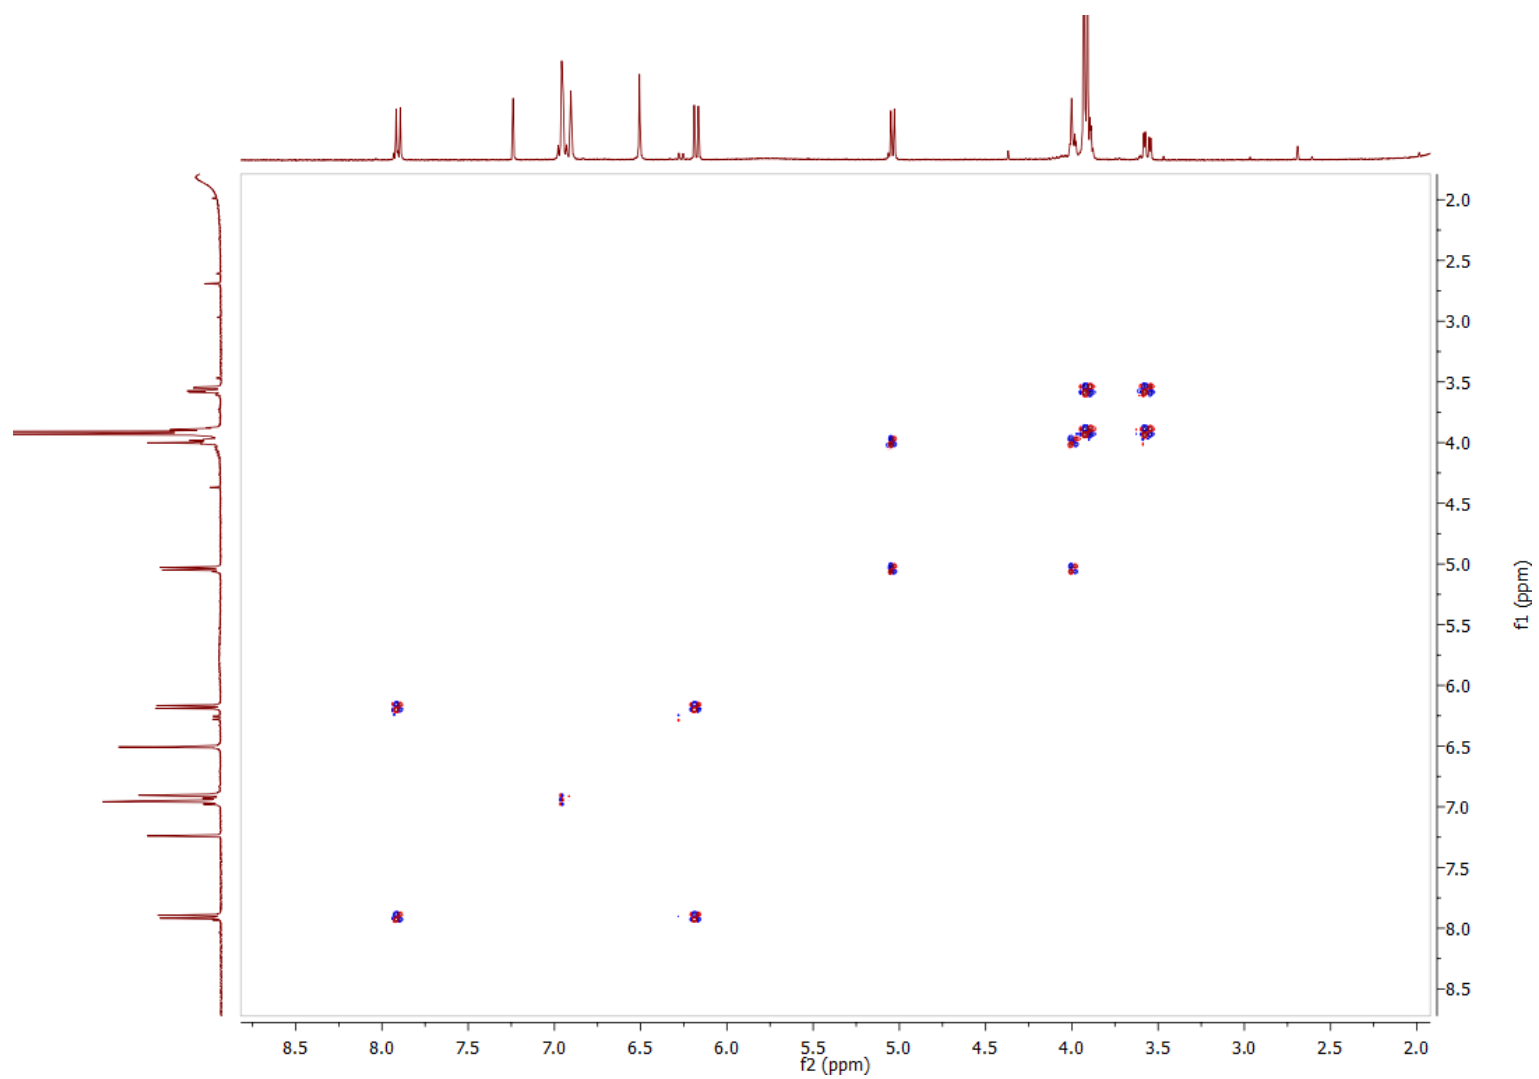

**Figure S15.** COSY spectrum of the new compound **1b**

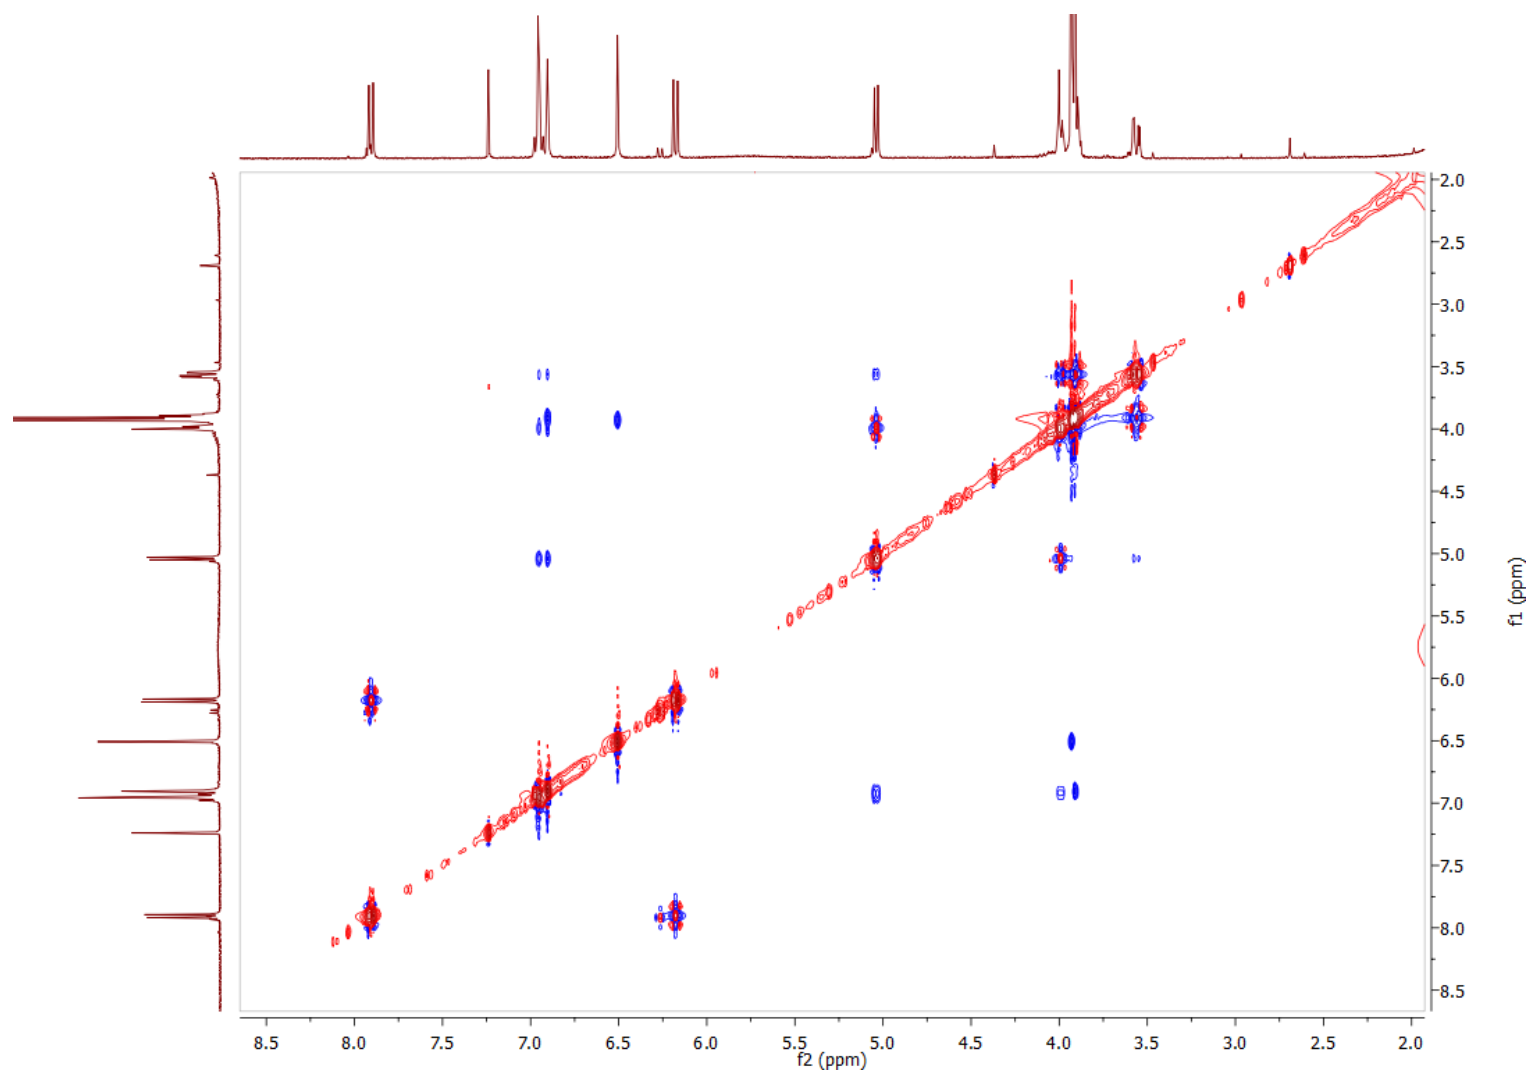

Figure S16. NOESY spectrum of the new compound **1b**

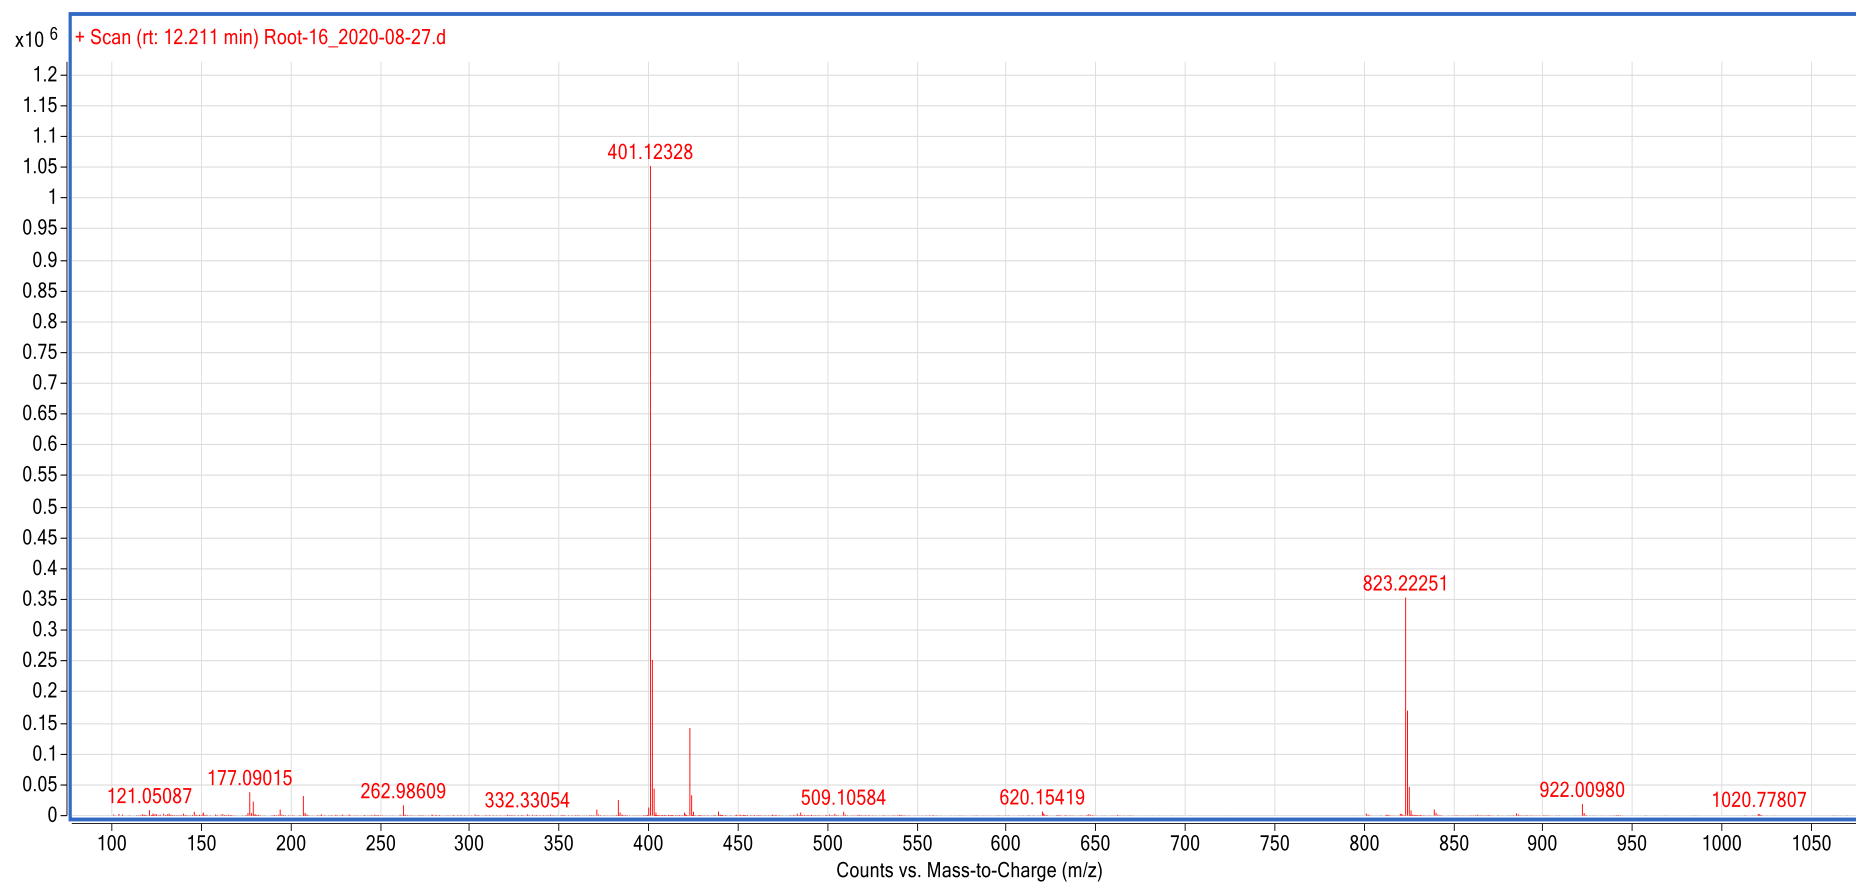

**Figure S17.** HRESI-MS spectrum of the new compound **2**

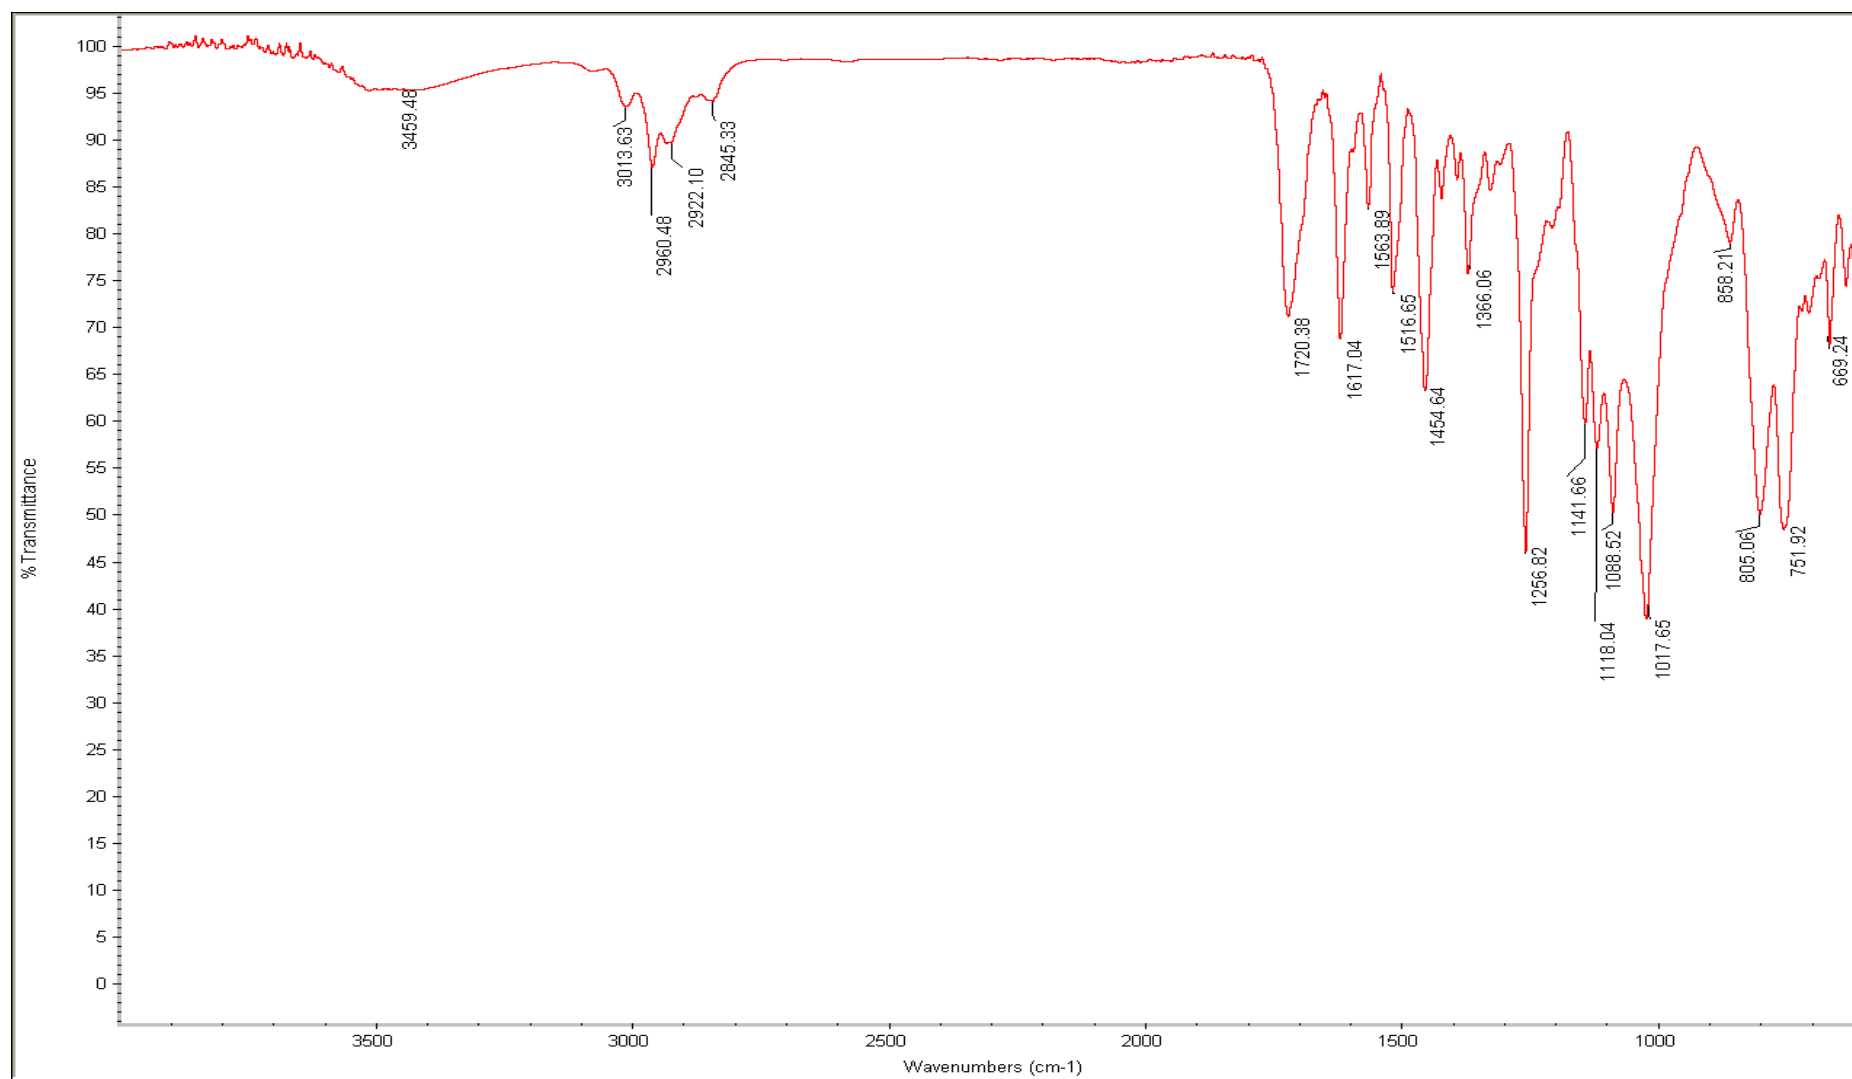

**Figure S18.** IR spectrum of the new compound **2**

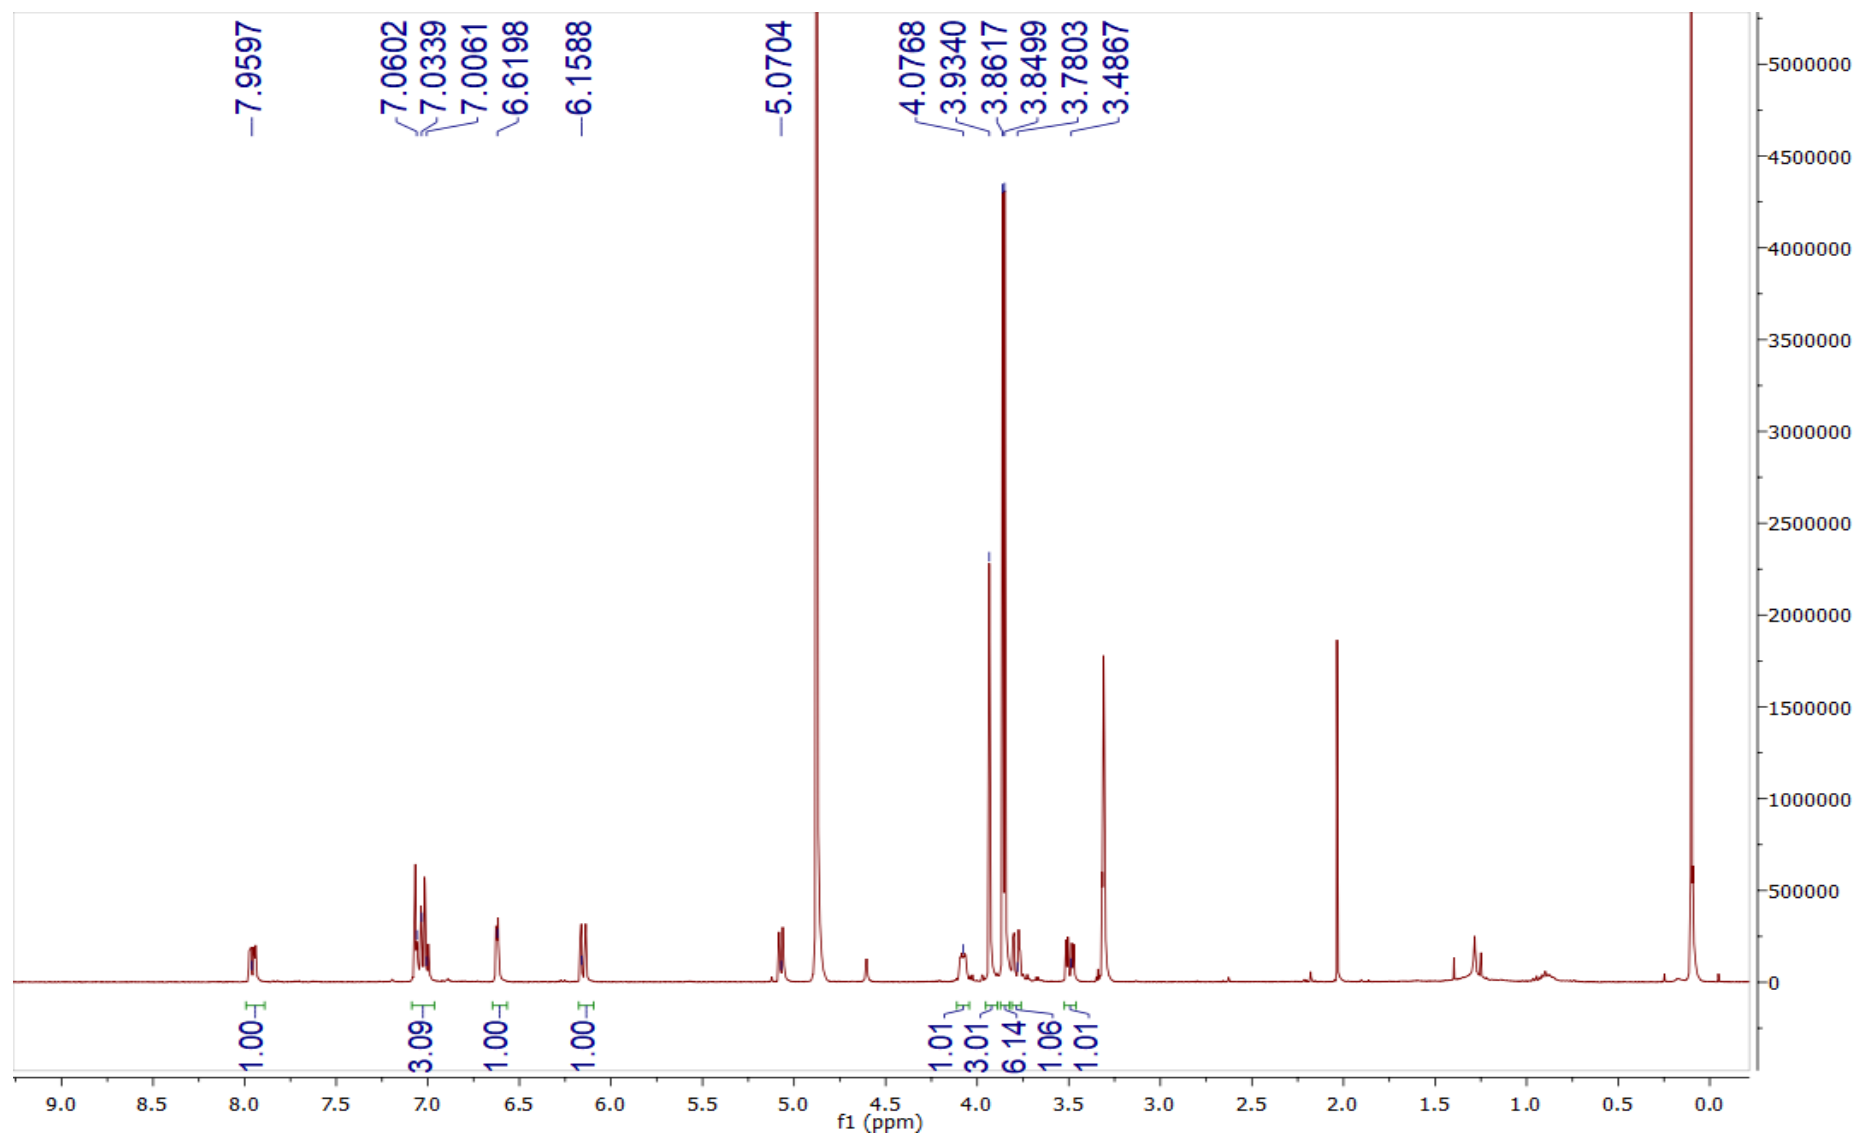

Figure S19. <sup>1</sup>H NMR (400 MHz, MeOD) spectrum of the new compound **2**



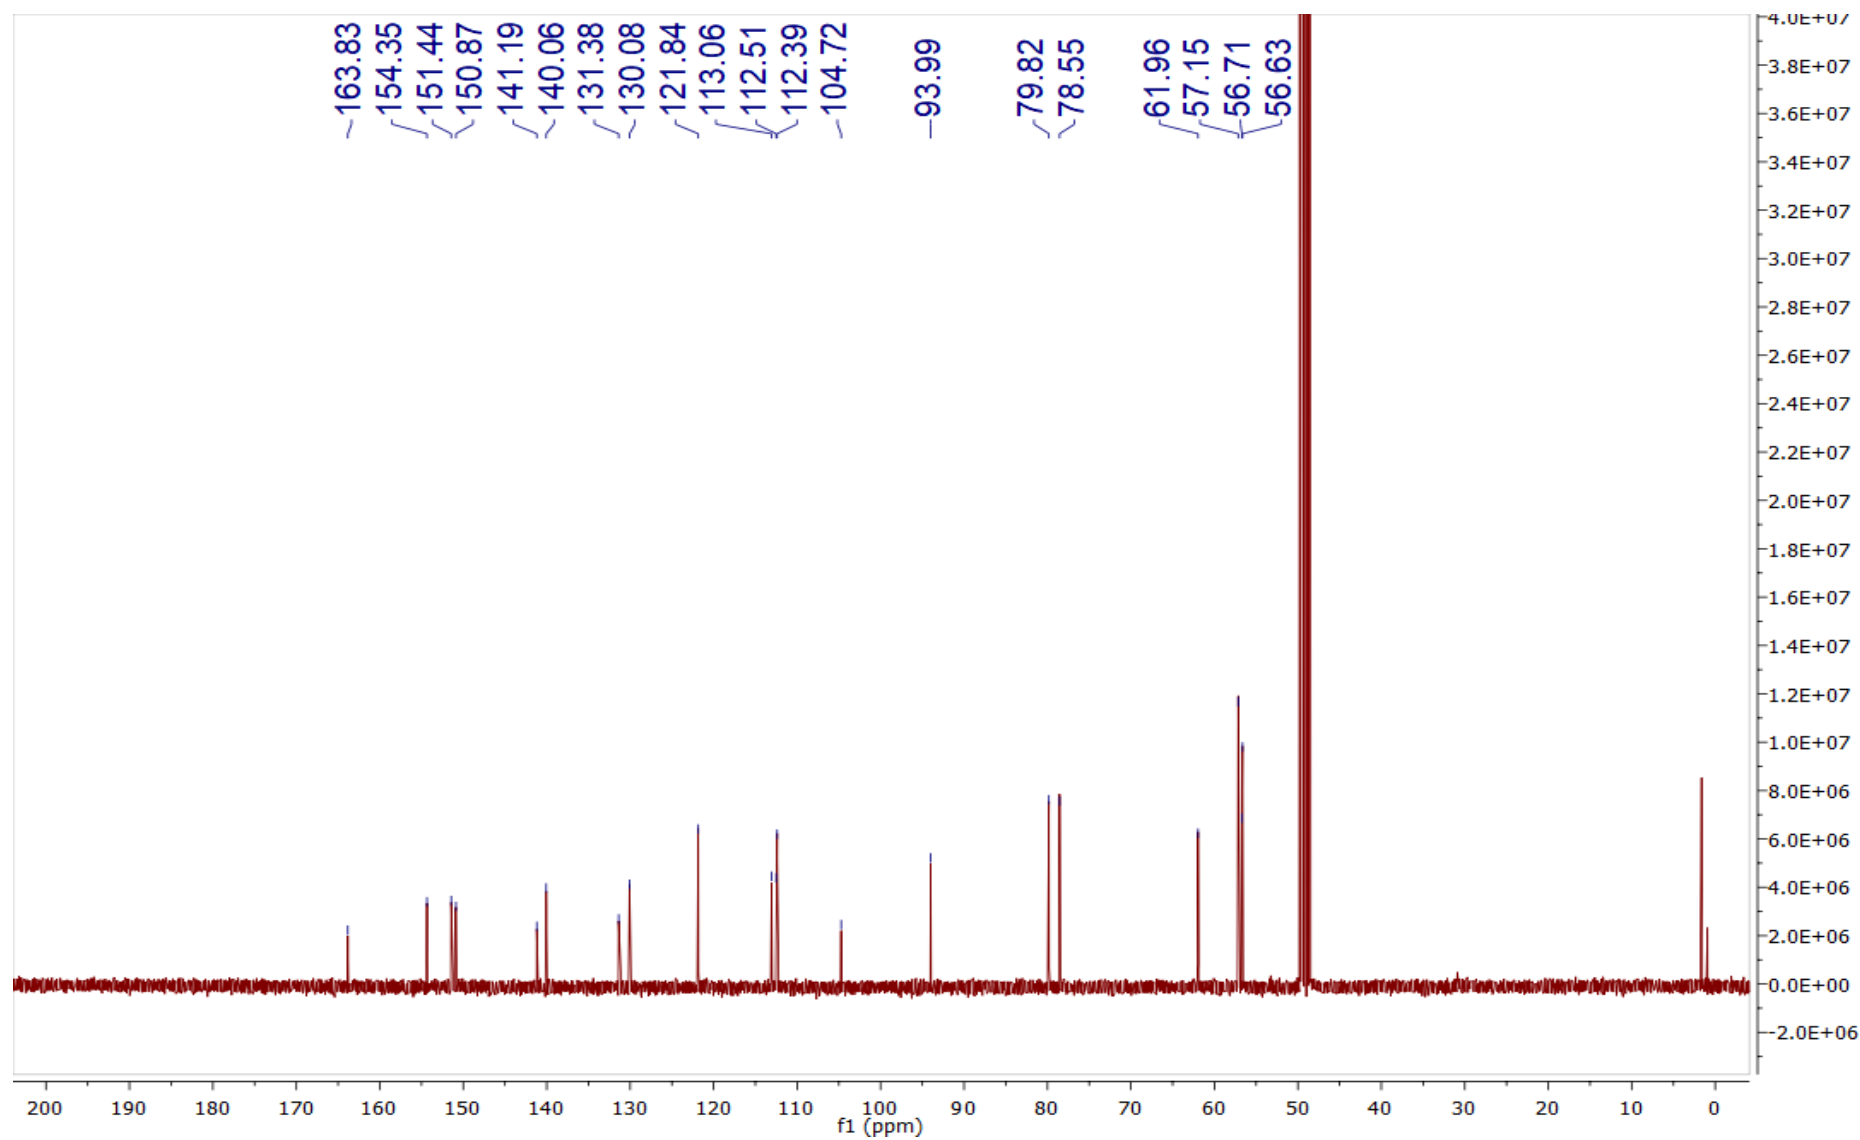

Figure S20.  $^{13}\text{C}$  NMR (100 MHz, MeOD) spectrum of the new compound **2**

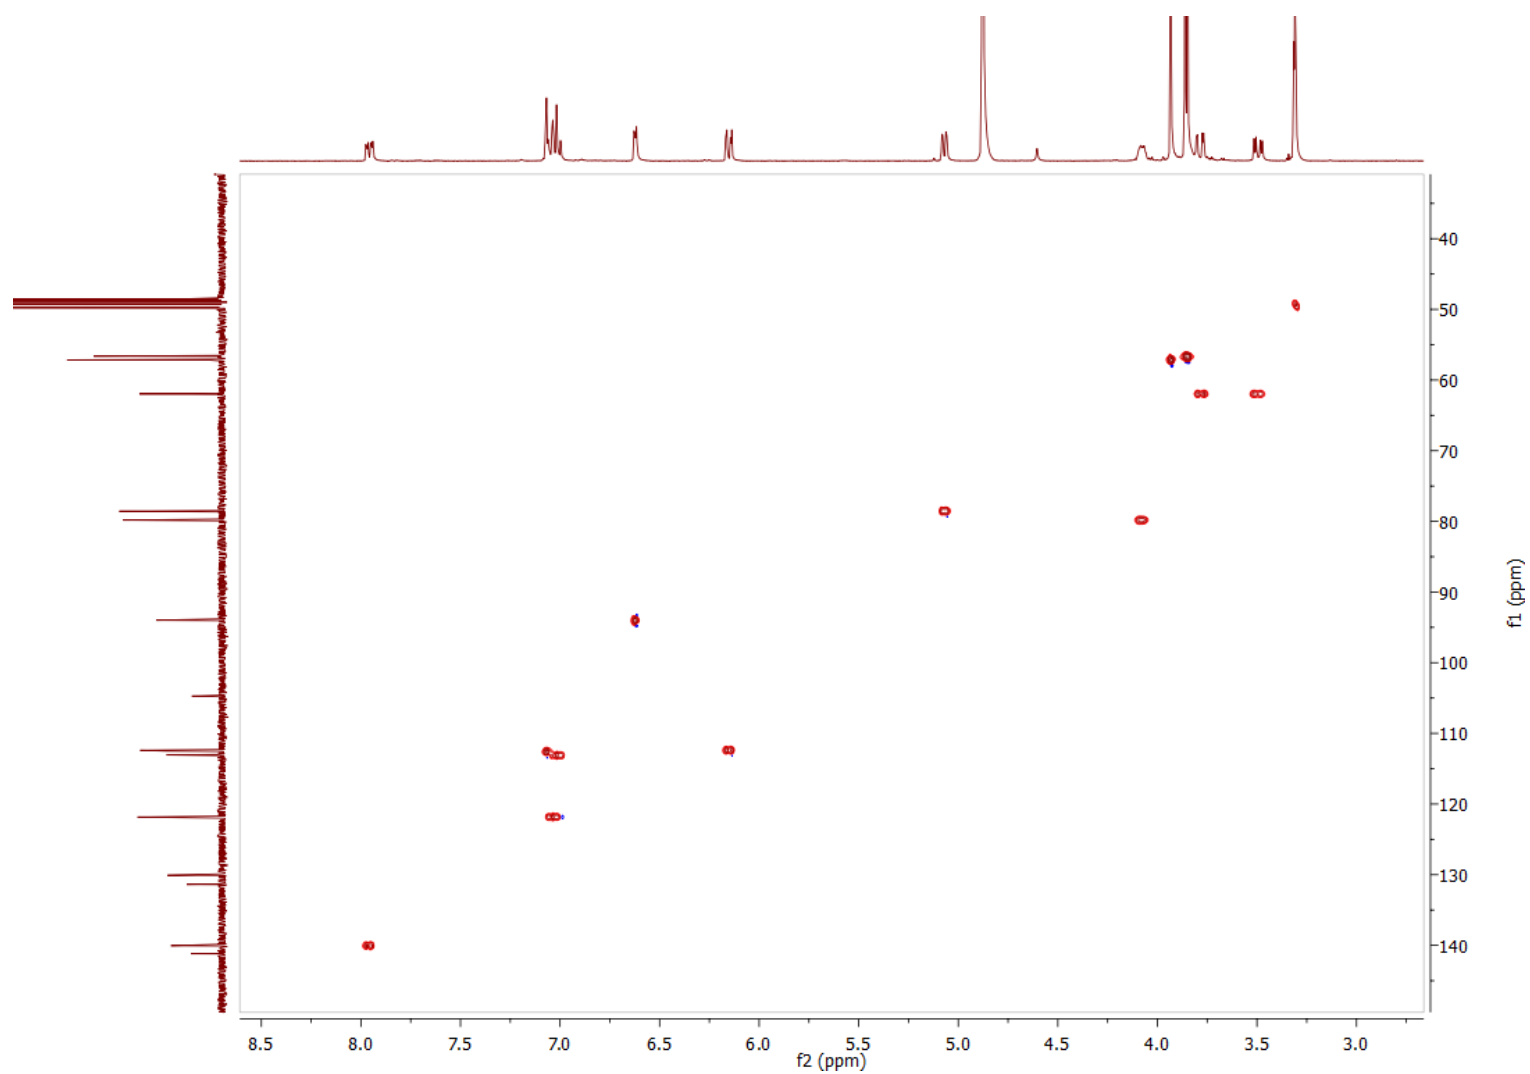

Figure S21. HSQC spectrum of the new compound **2**

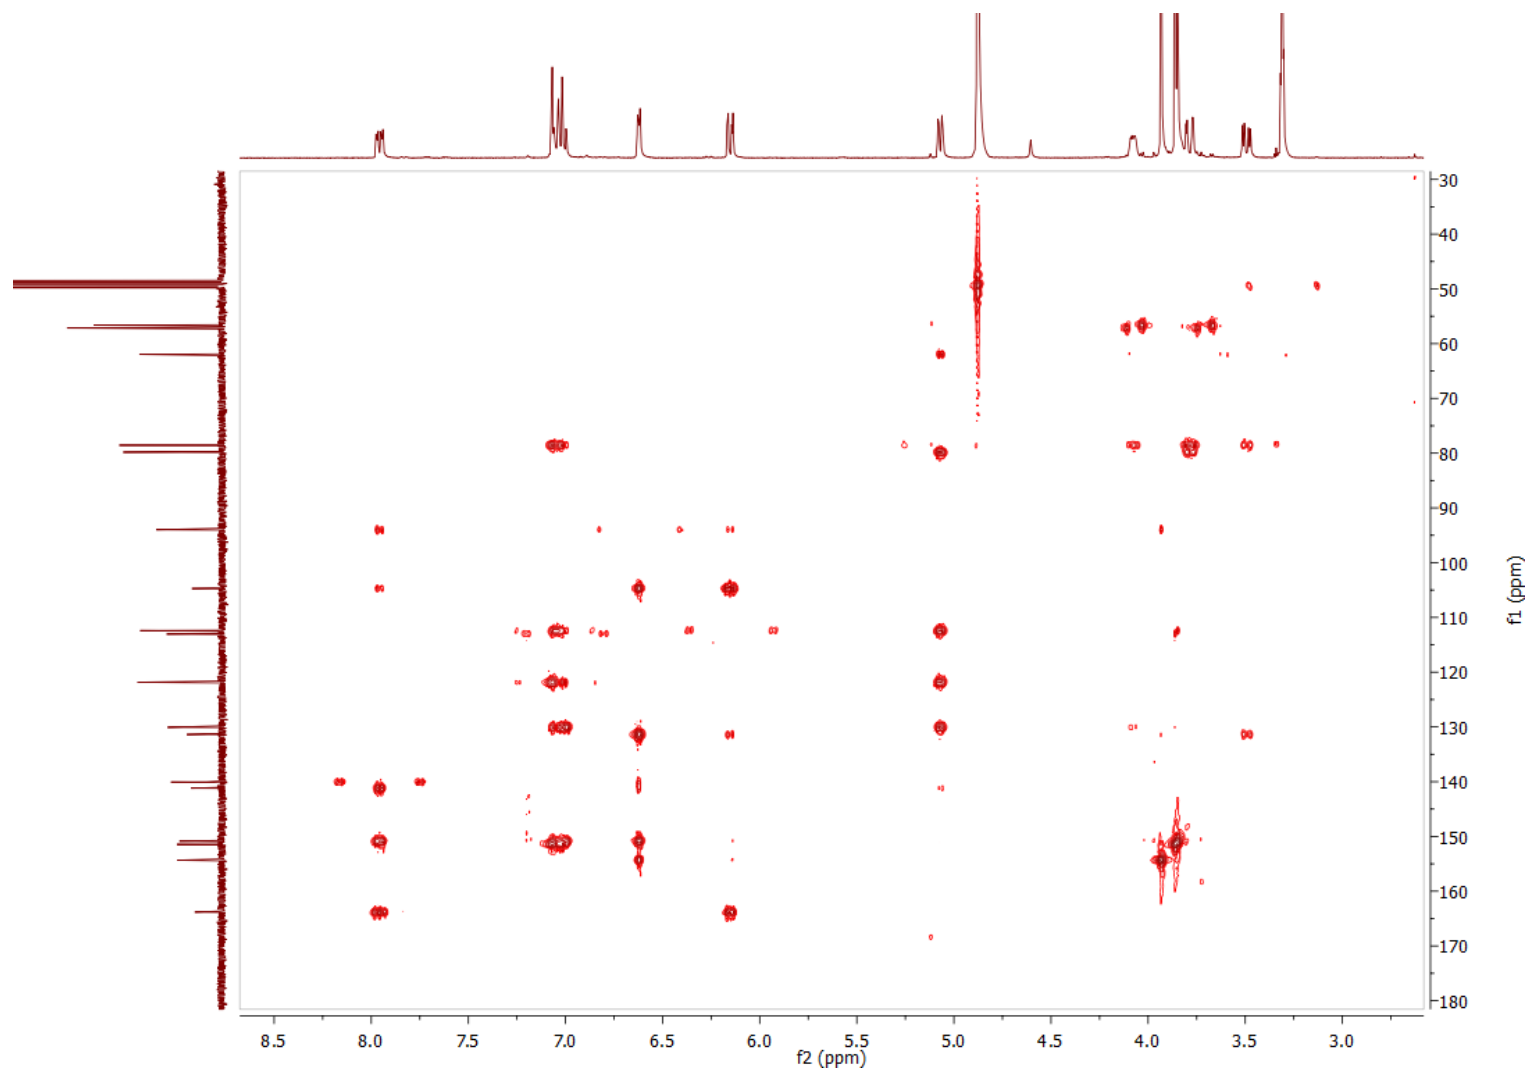

**Figure S22.** HMBC spectrum of the new compound **2**

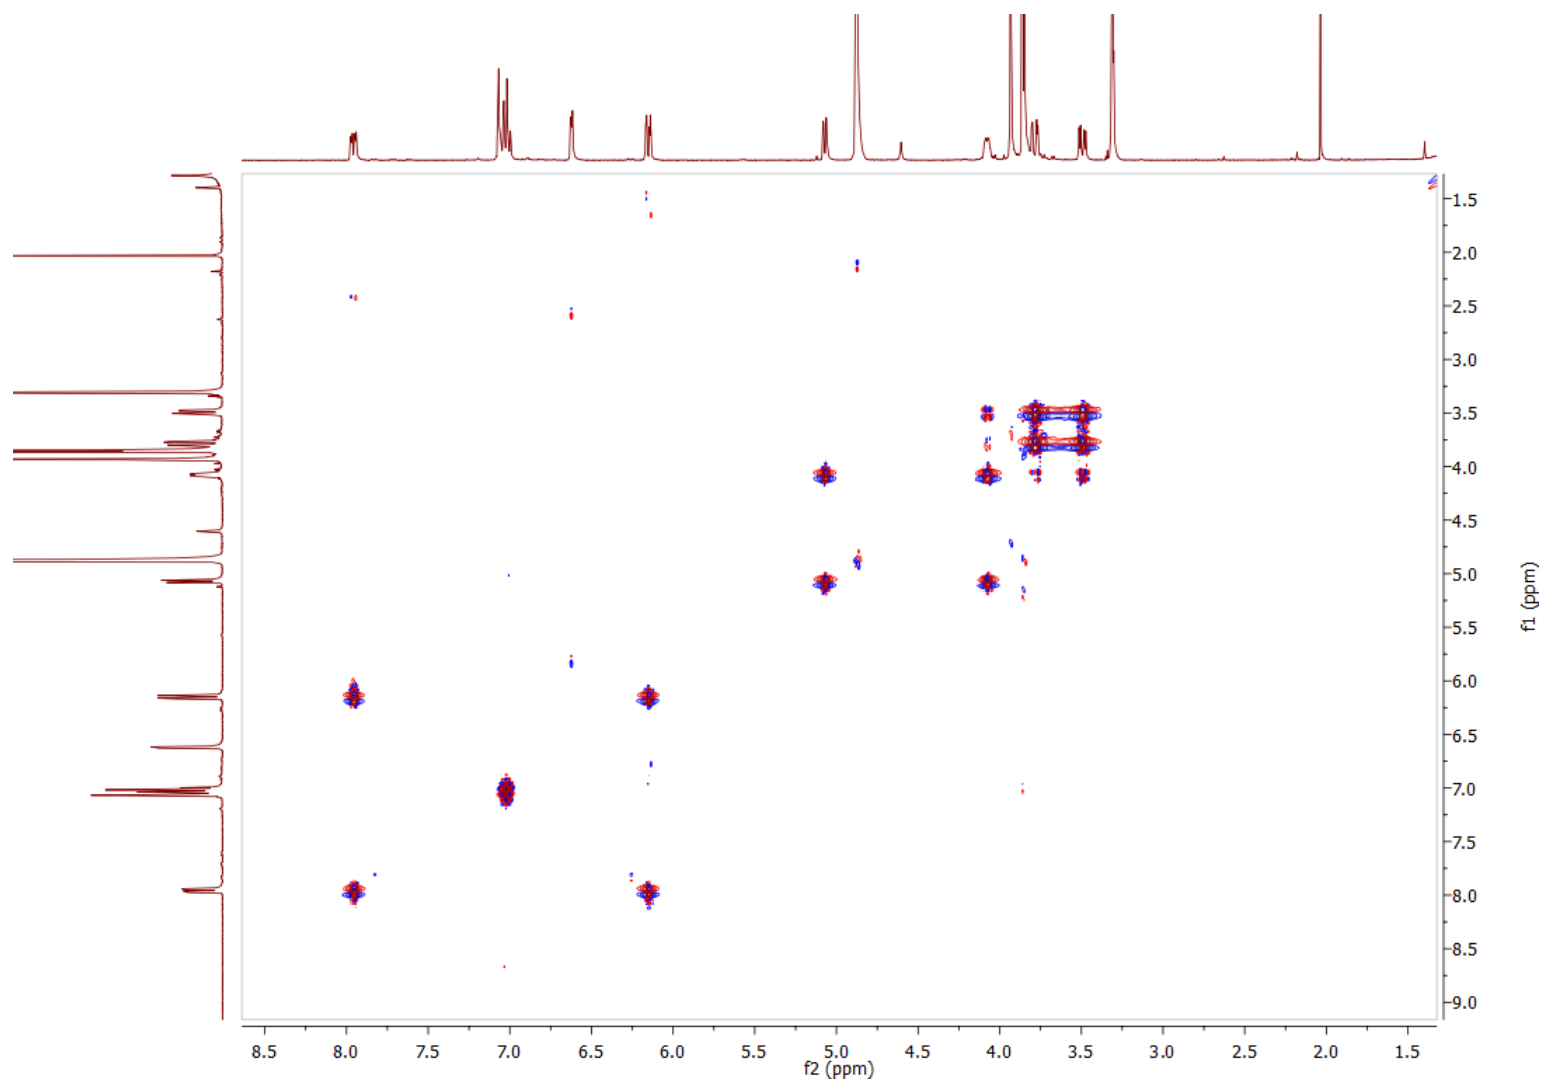

**Figure S23.** COSY spectrum of the new compound **2**

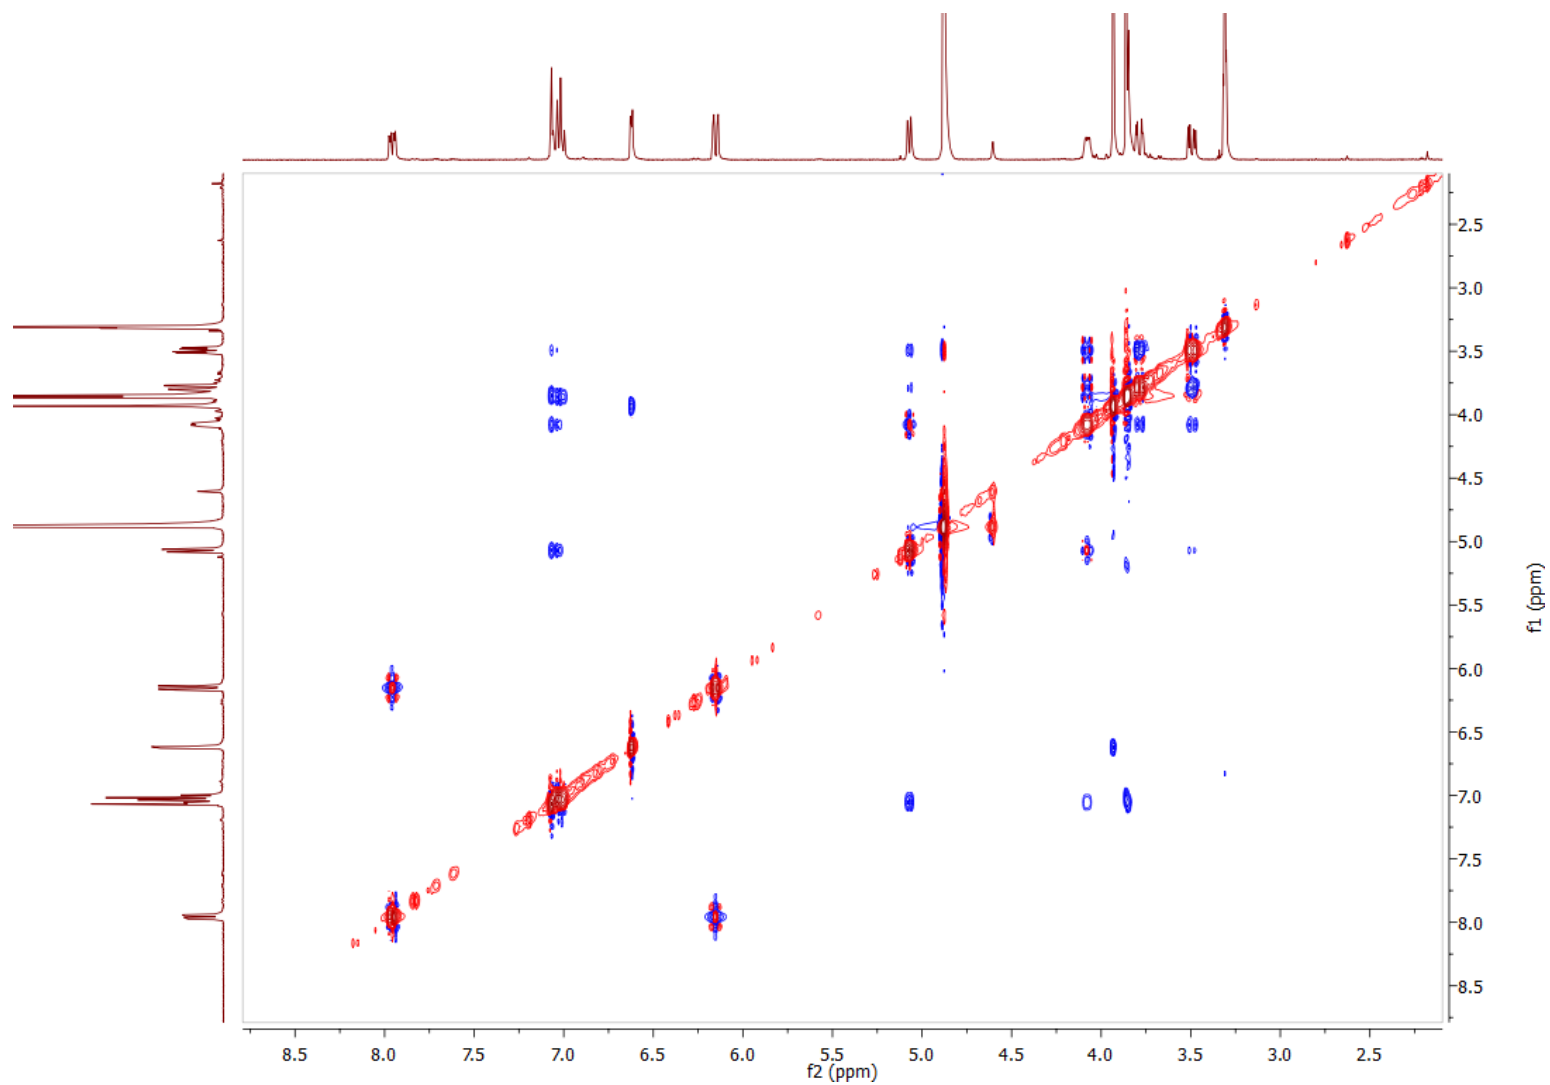

**Figure S24.** NOESY spectrum of the new compound **2**

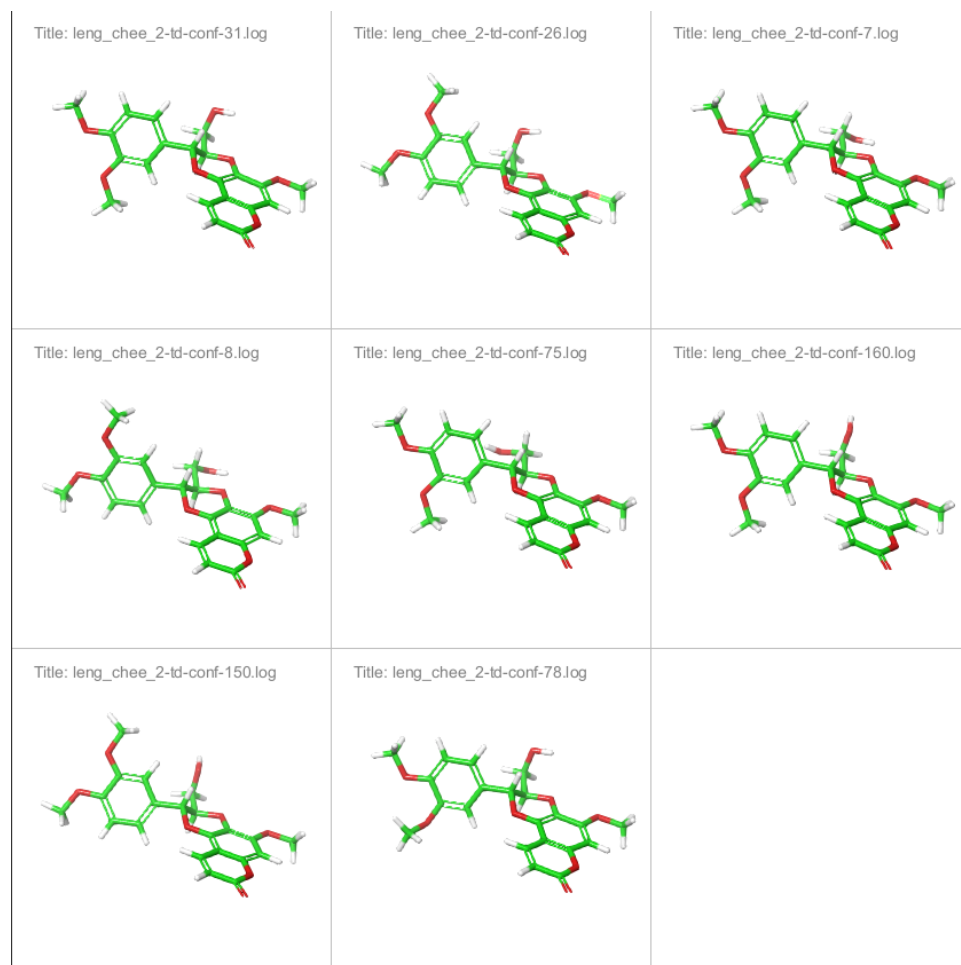

**Figure S25.** Images of conformers (>1%) for the new compound **2**

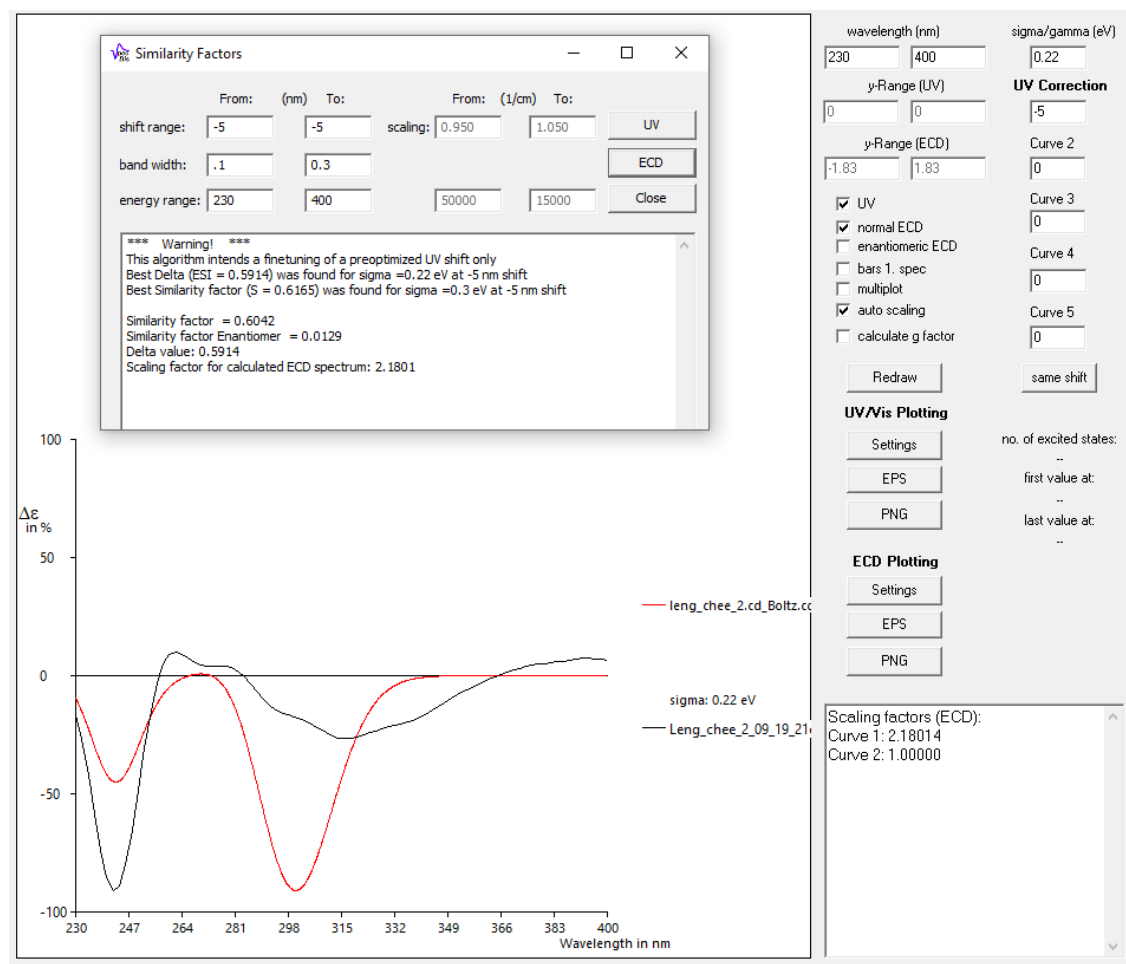

**Figure S26.** CD spectrum (experimental to calculated comparison by SpecDis) of the new compound **2**

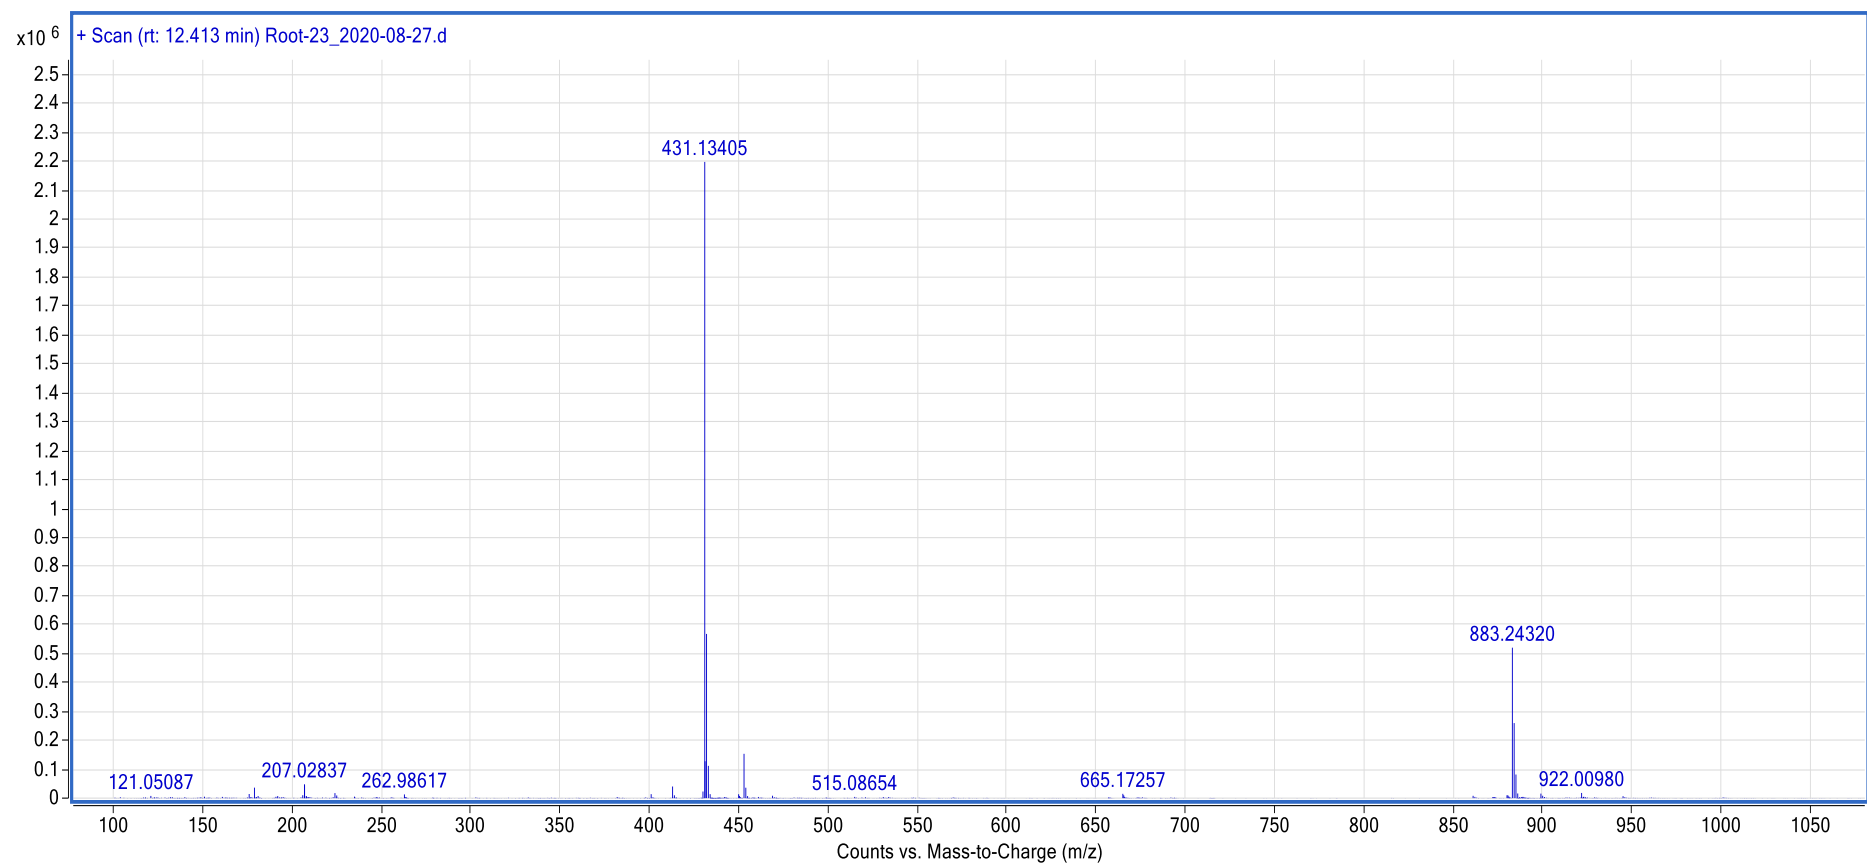

**Figure S27.** HRESI-MS spectrum of the new compound **3**



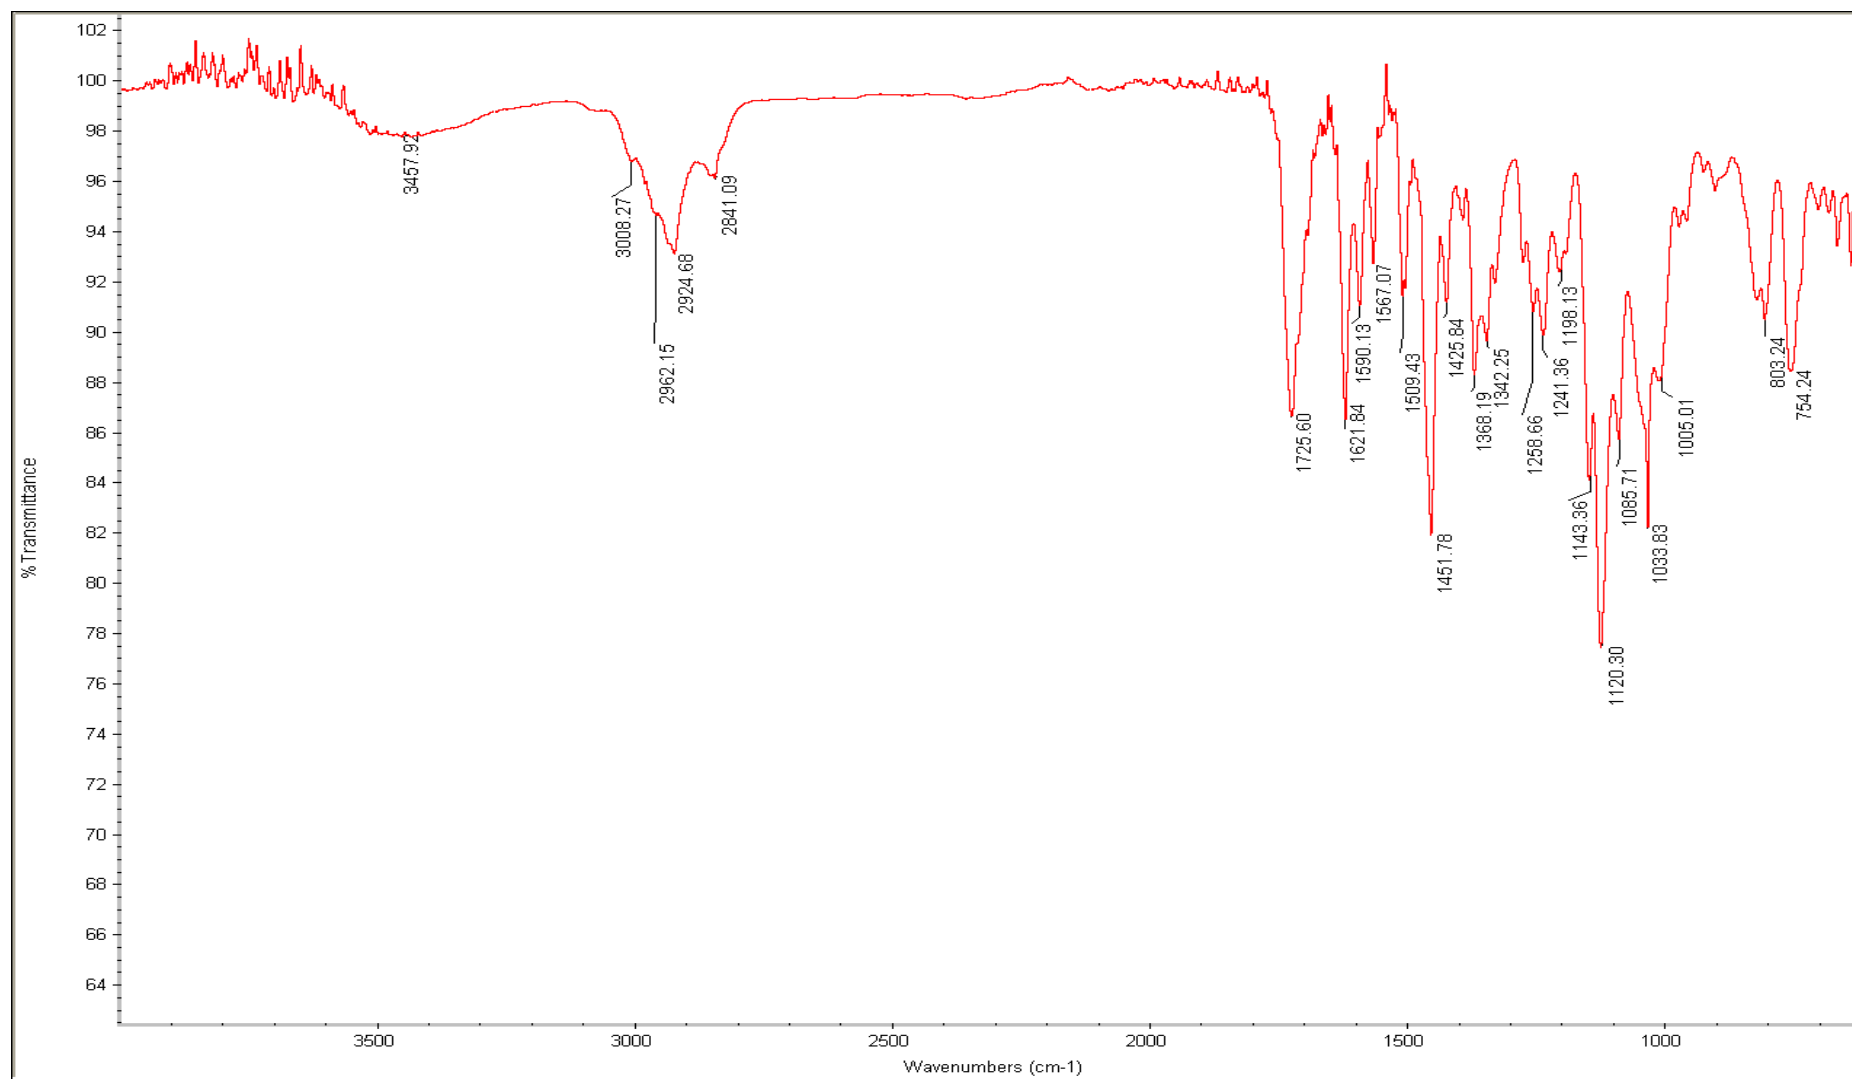

**Figure S28.** IR spectrum of the new compound **3**

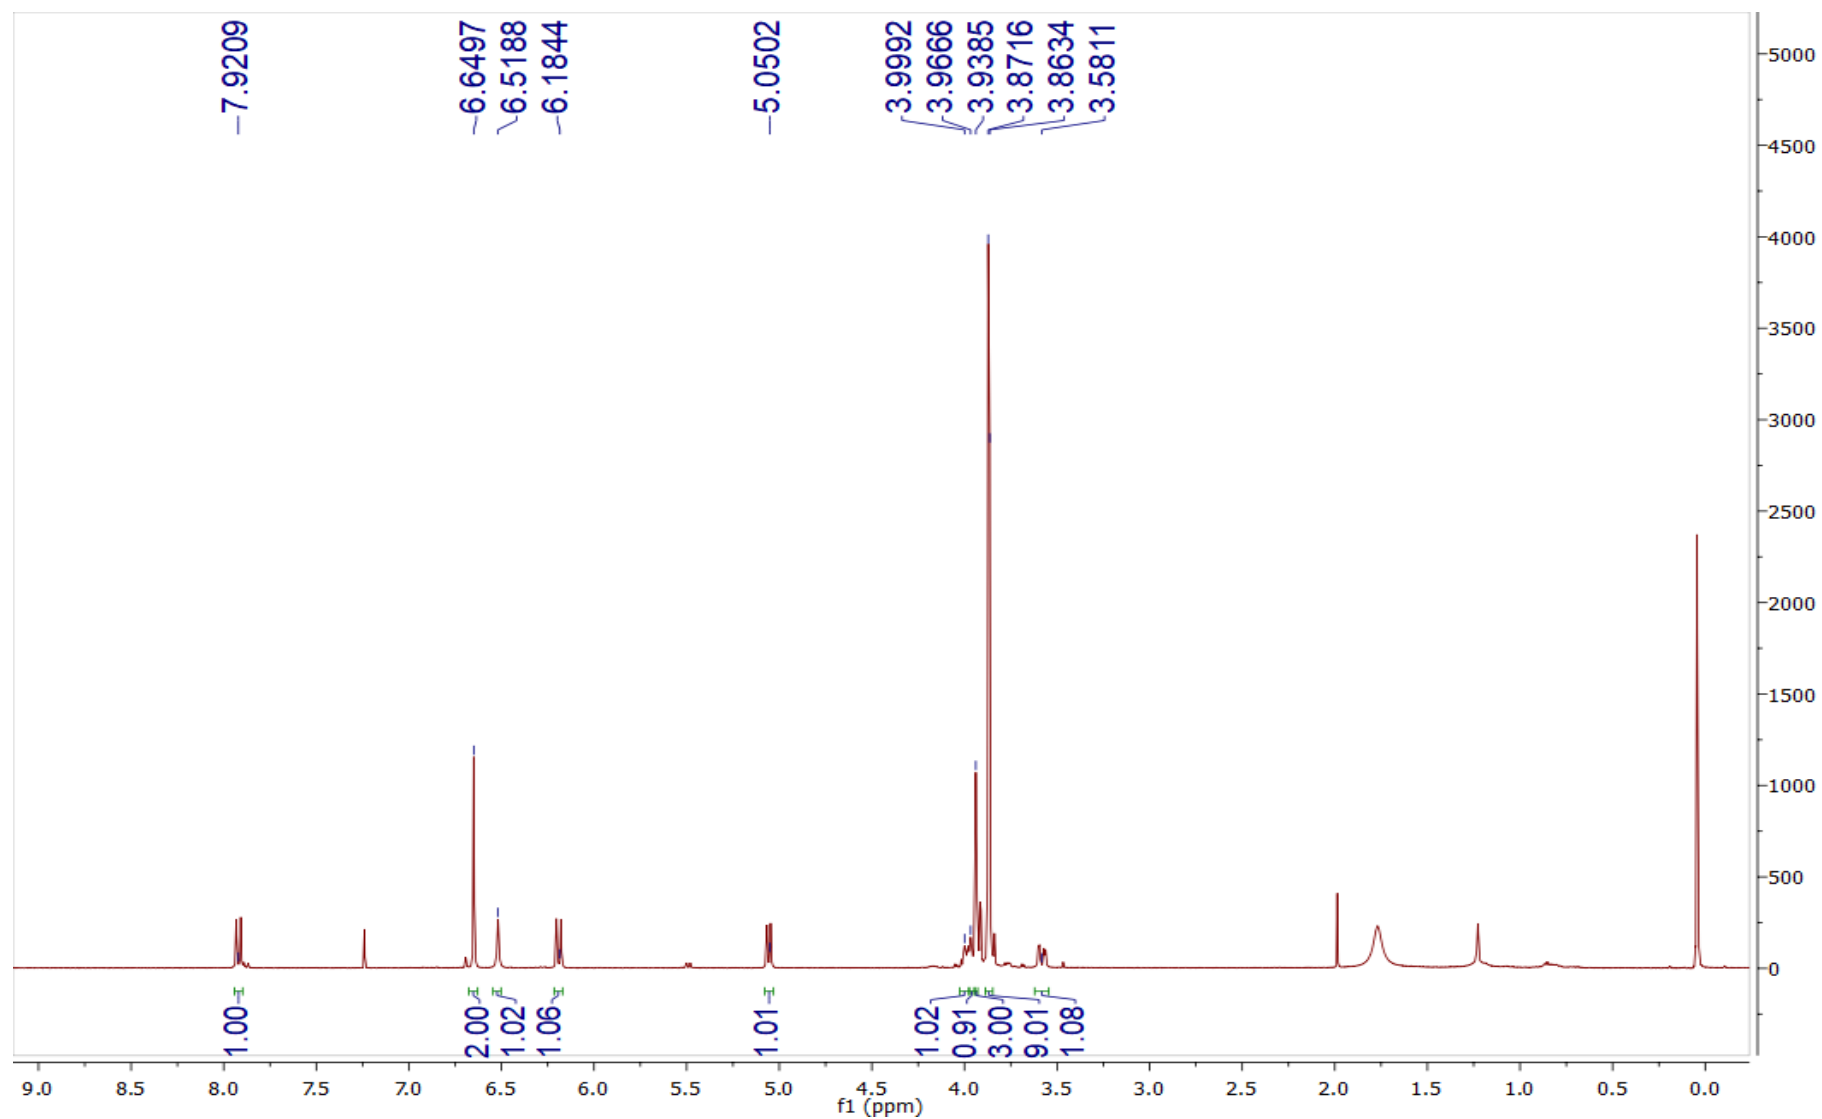

**Figure S29.**  $^1\text{H}$  NMR (400 MHz,  $\text{CDCl}_3$ ) spectrum of the new compound **3**

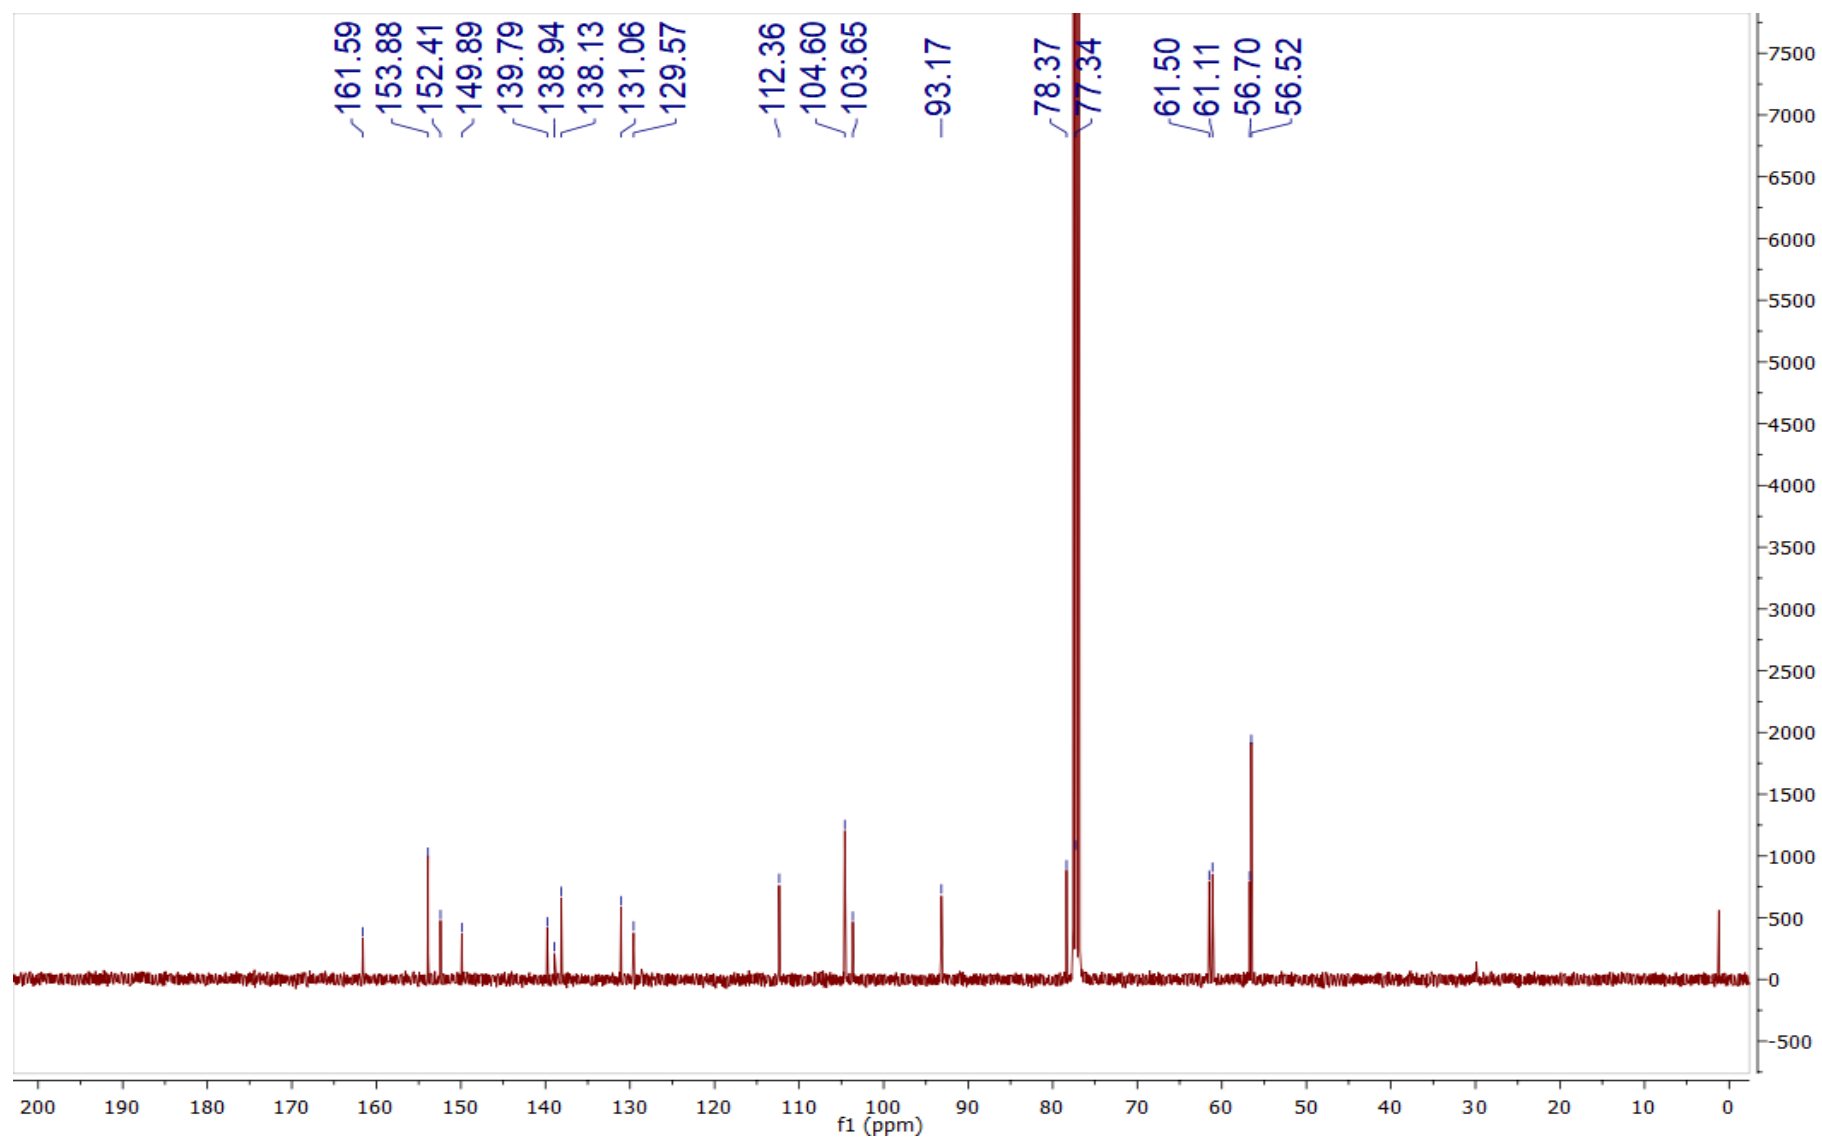

Figure S30. <sup>13</sup>C NMR (100 MHz, CDCl<sub>3</sub>) spectrum of the new compound **3**

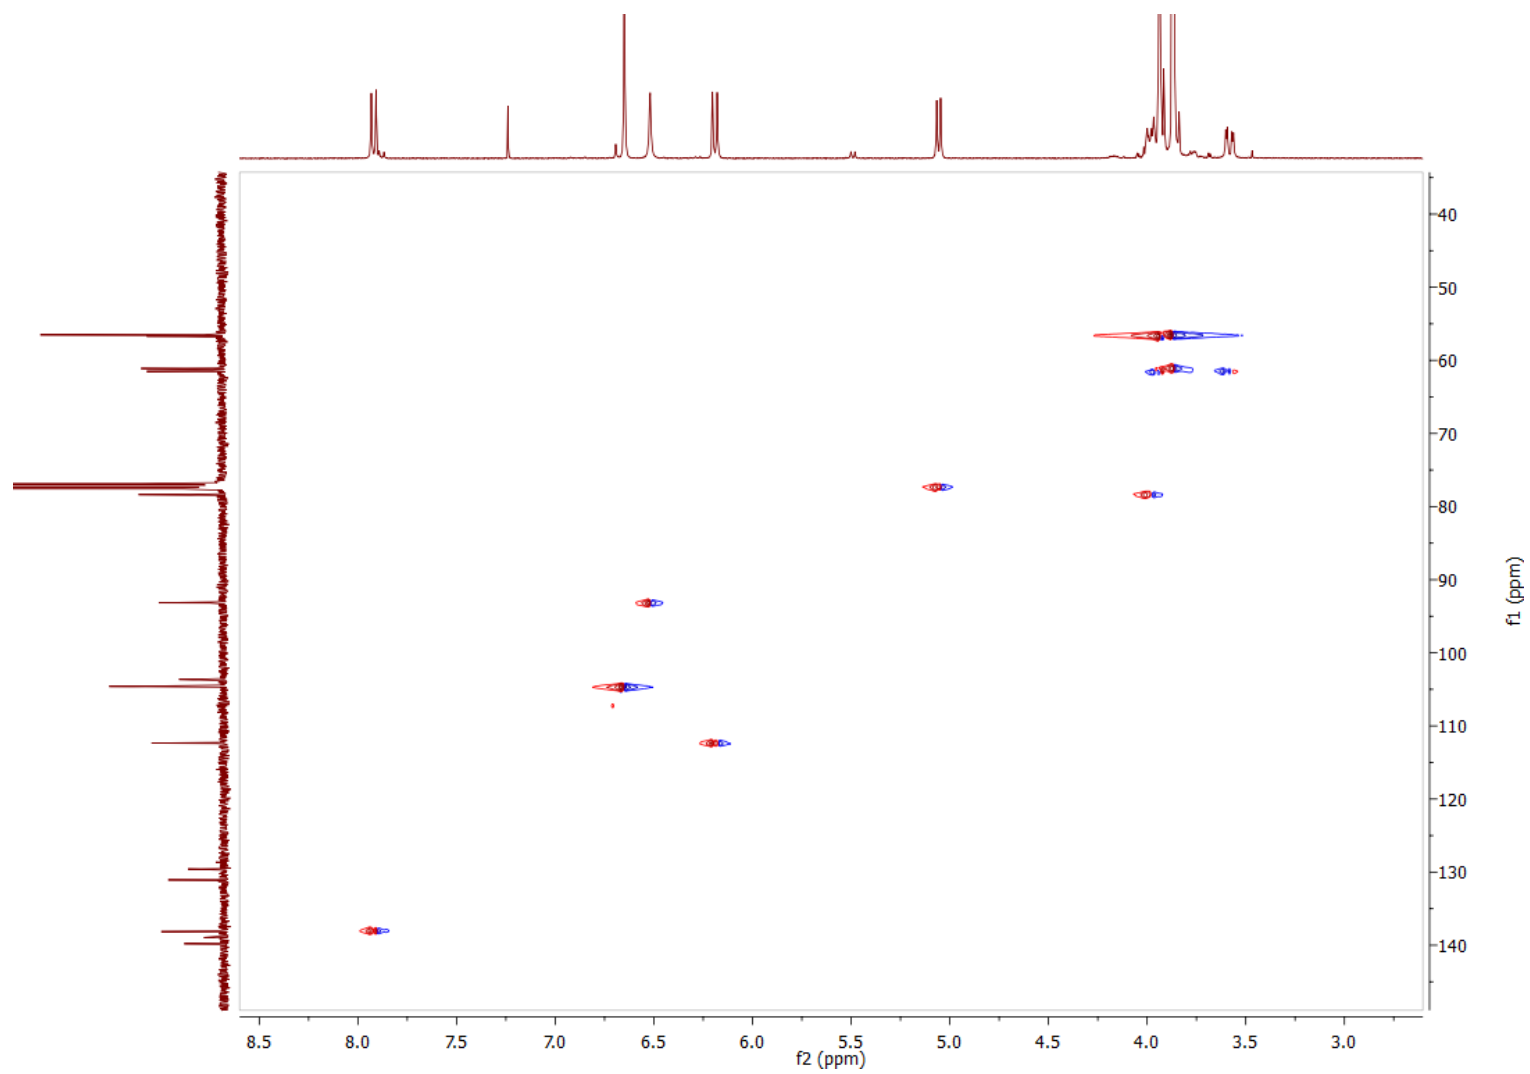

Figure S31. HSQC spectrum of the new compound **3**

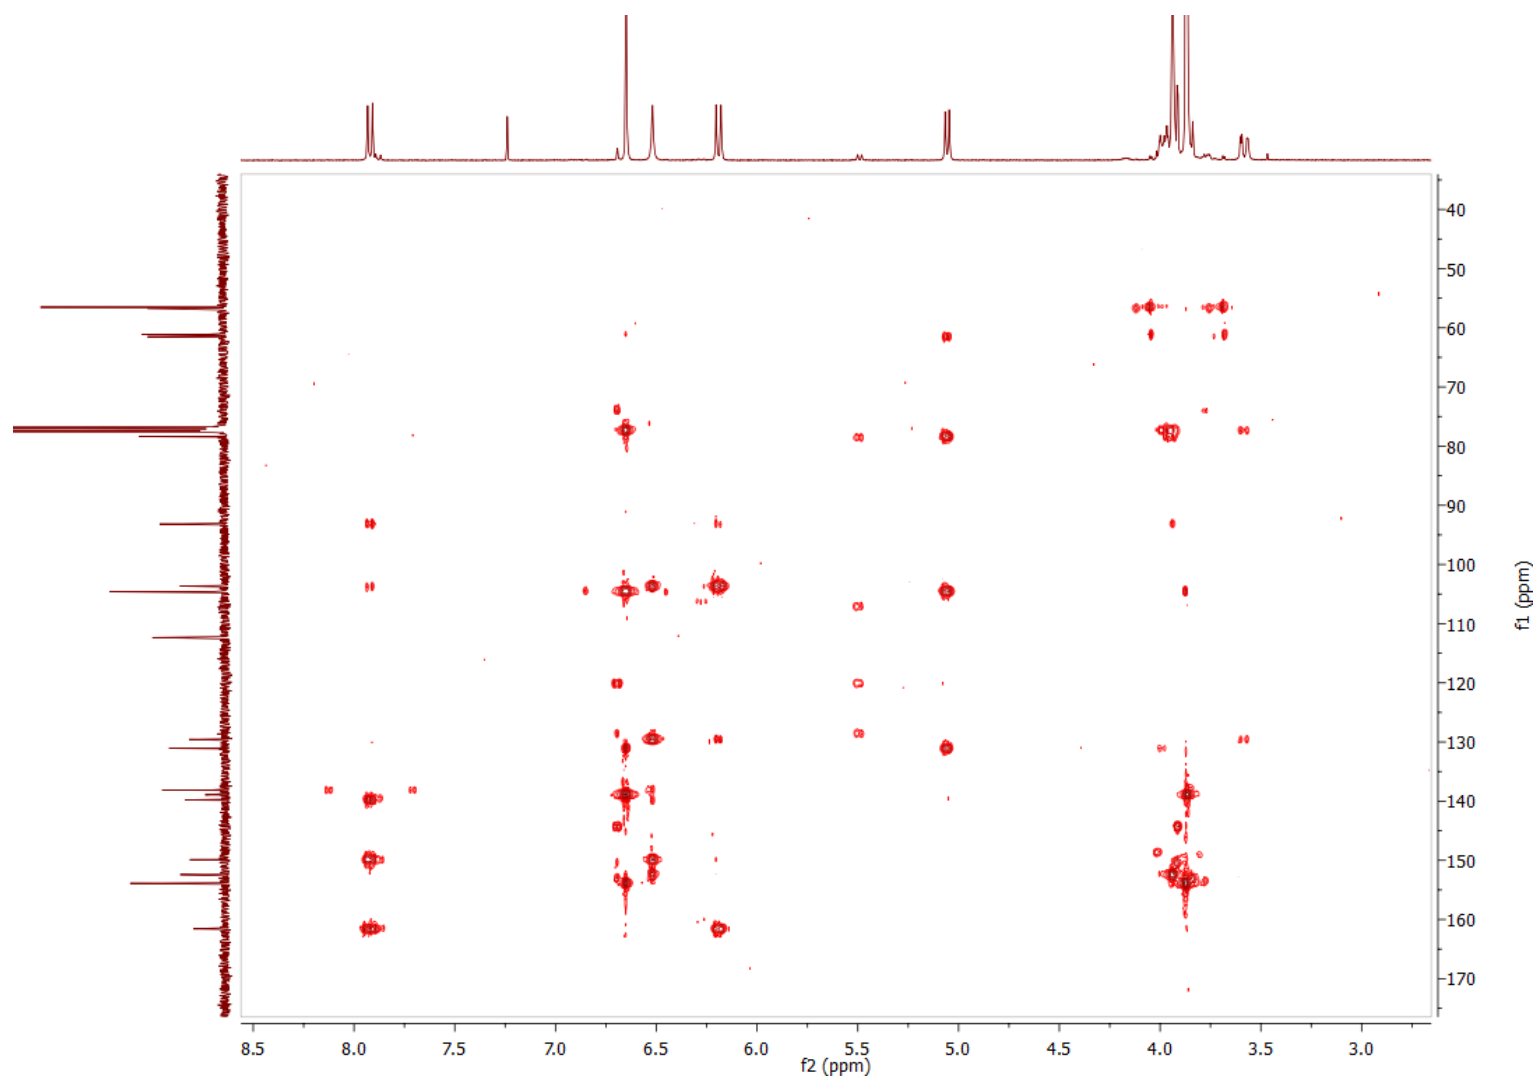

**Figure S32.** HMBC spectrum of the new compound **3**

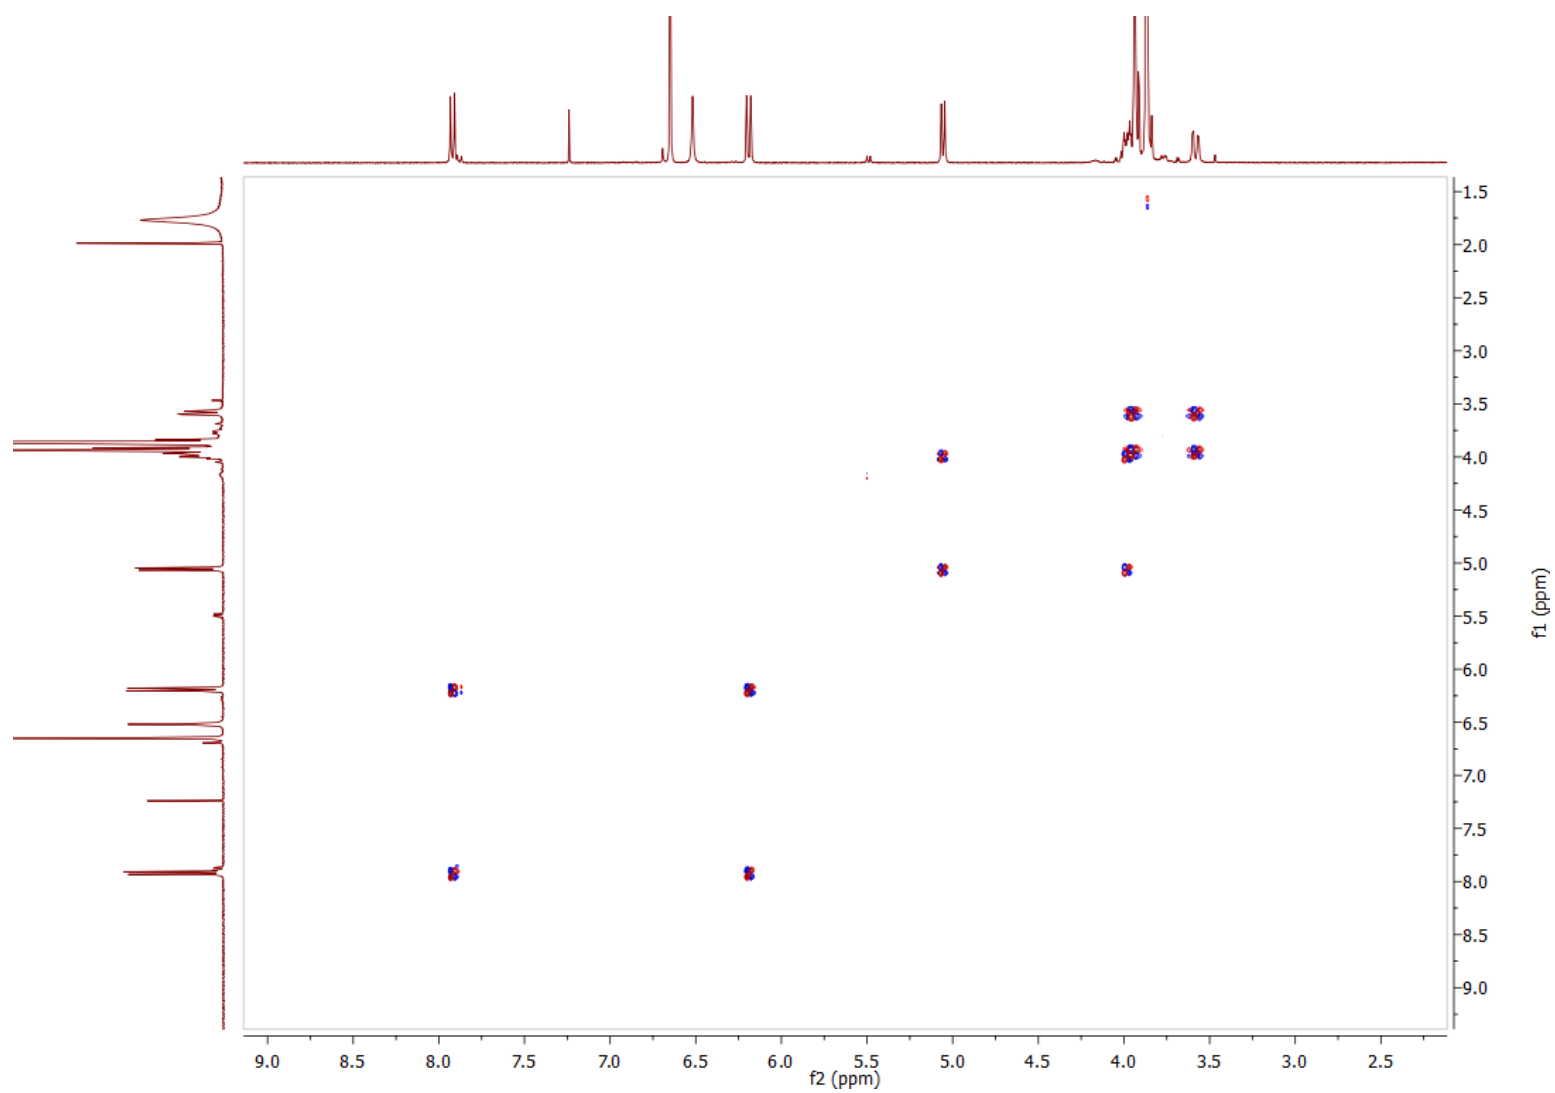

**Figure S33.** COSY spectrum of the new compound **3**

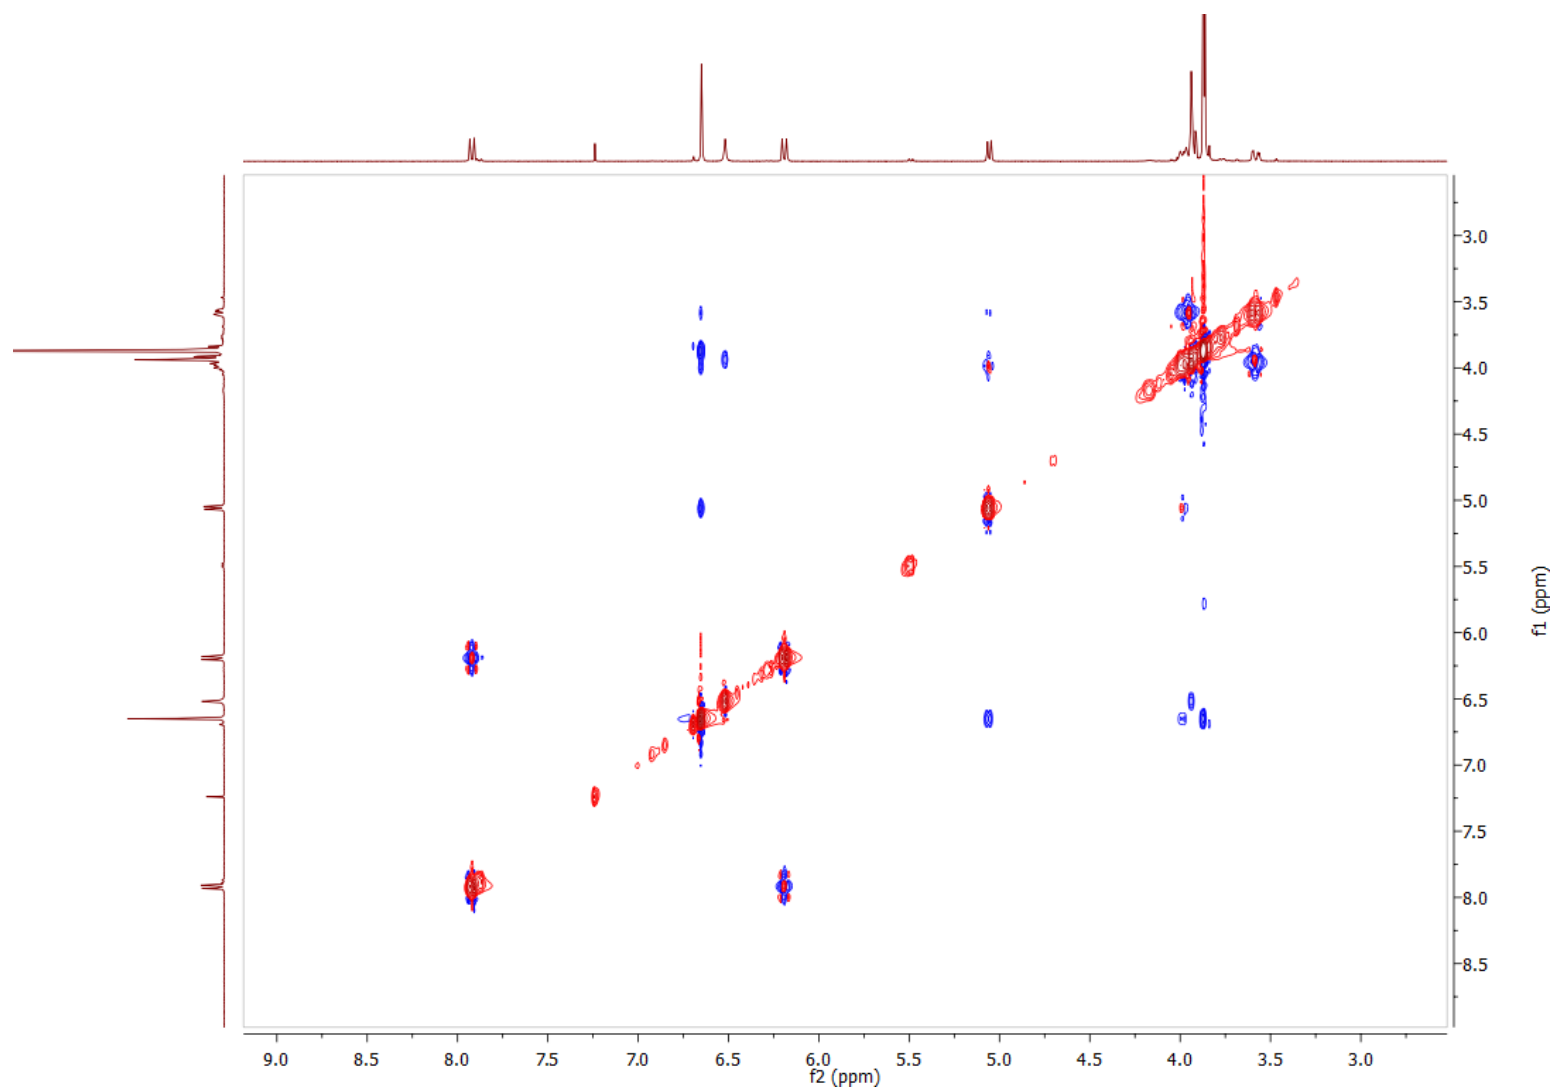

**Figure S34.** NOESY spectrum of the new compound **3**

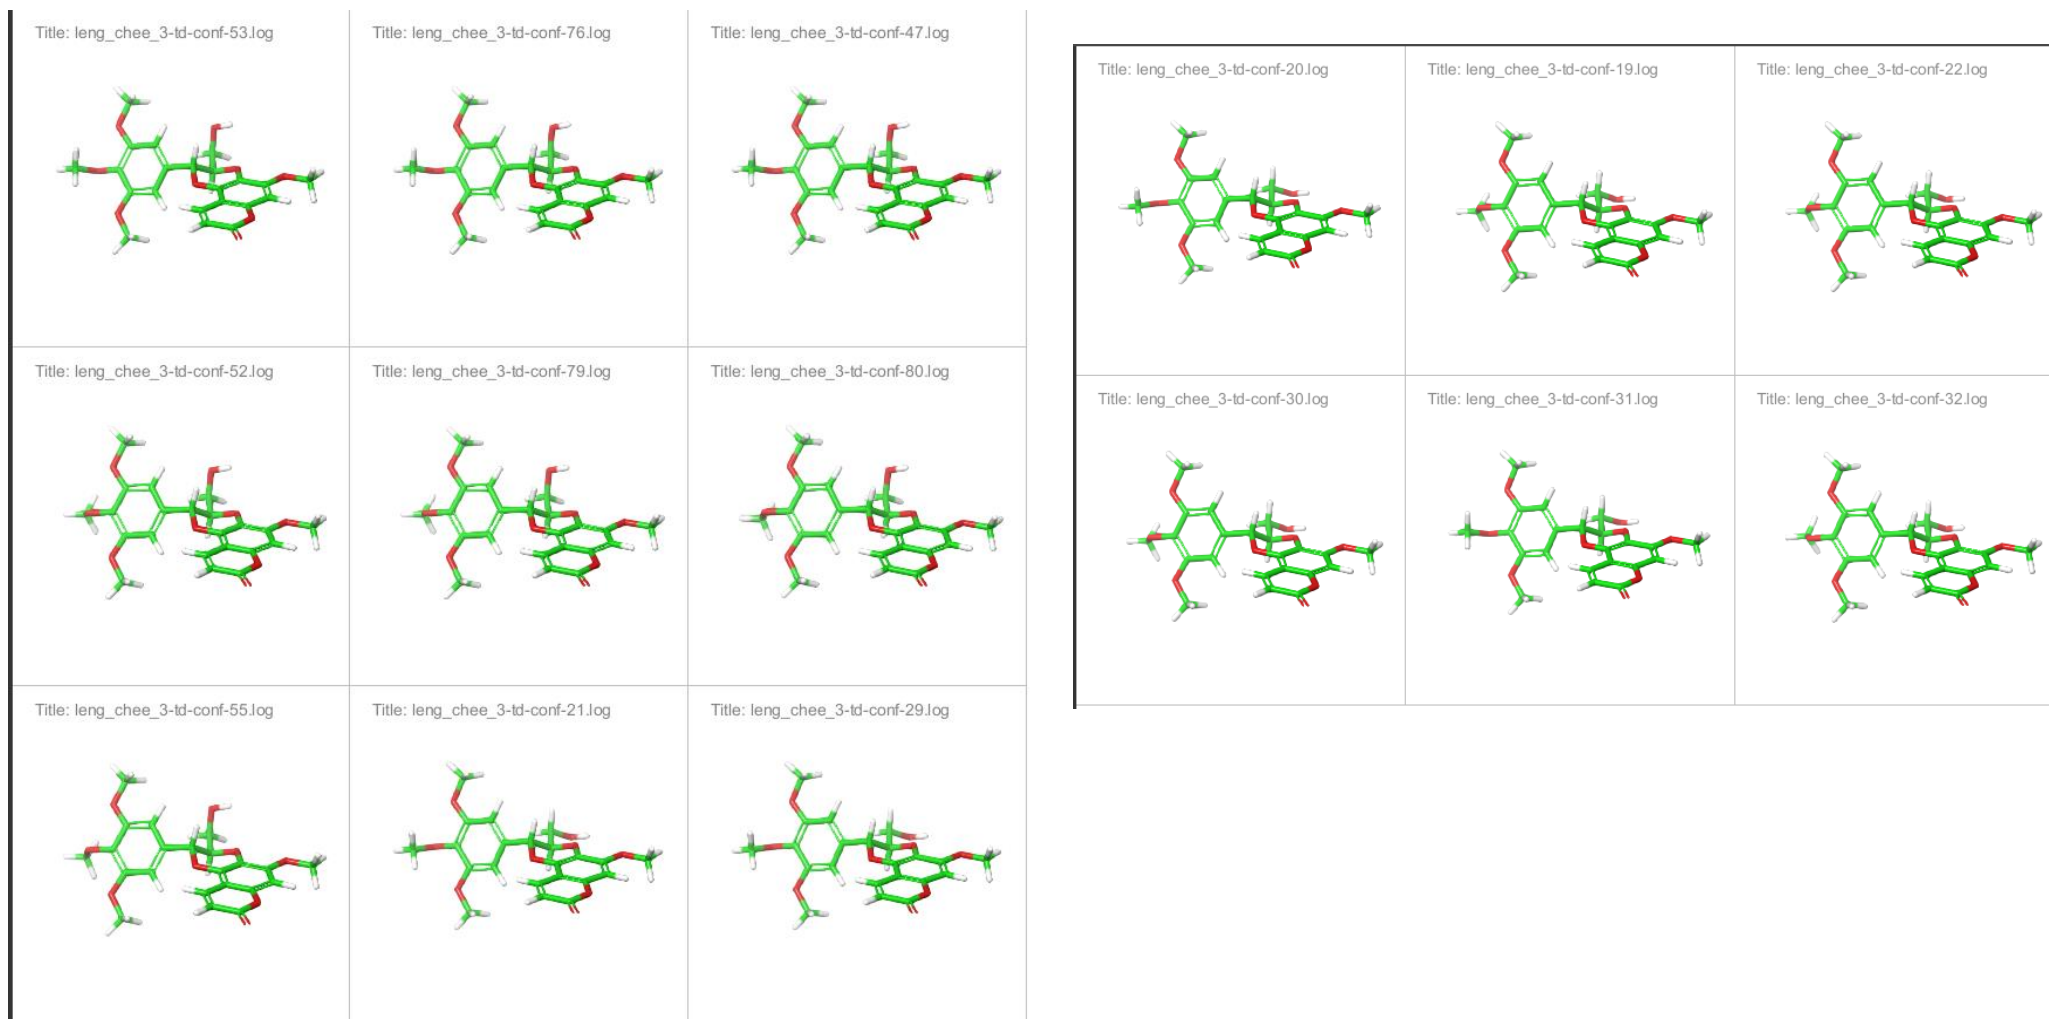

**Figure S35.** Images of Conformers (>1%) for the new compound **3**



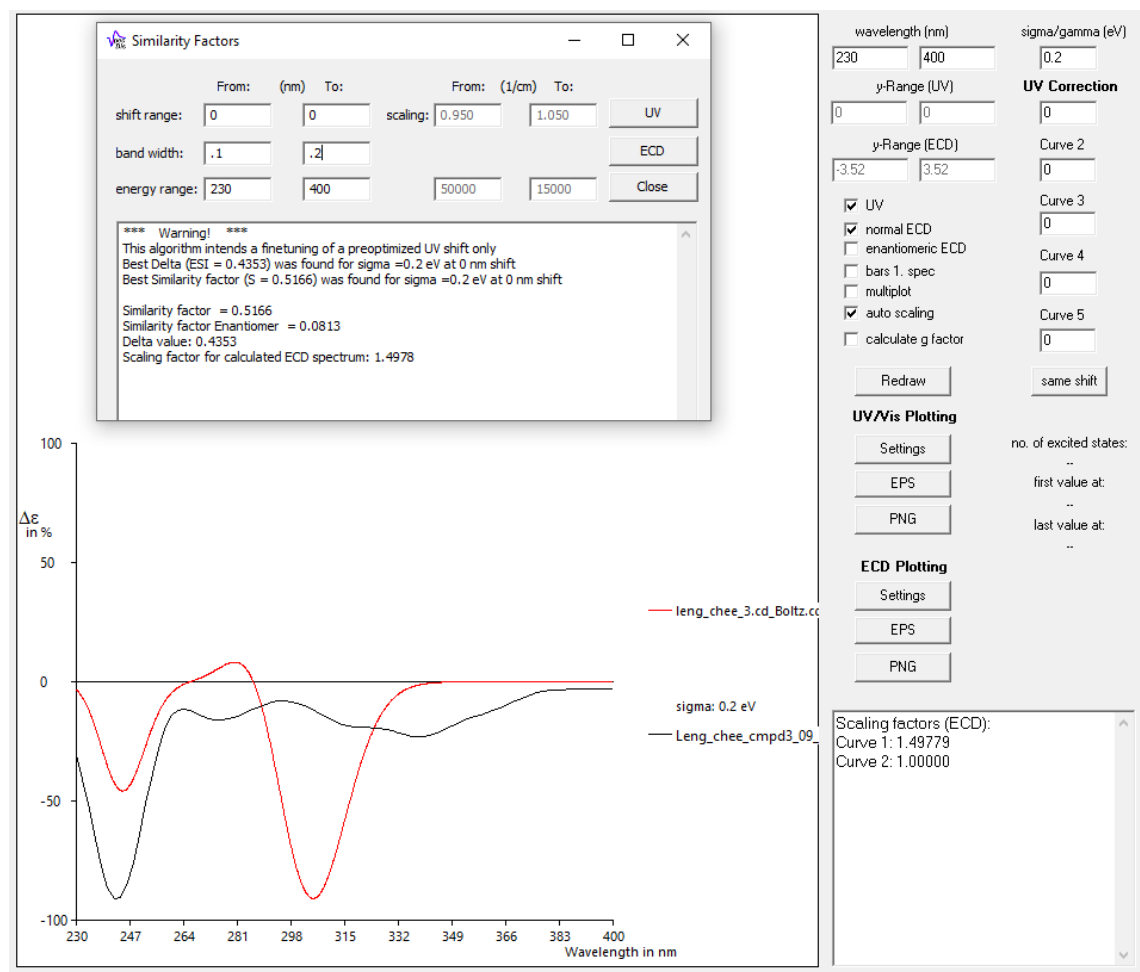

**Figure S36.** CD spectrum (experimental to calculated comparison by SpecDis) of the new compound **3**

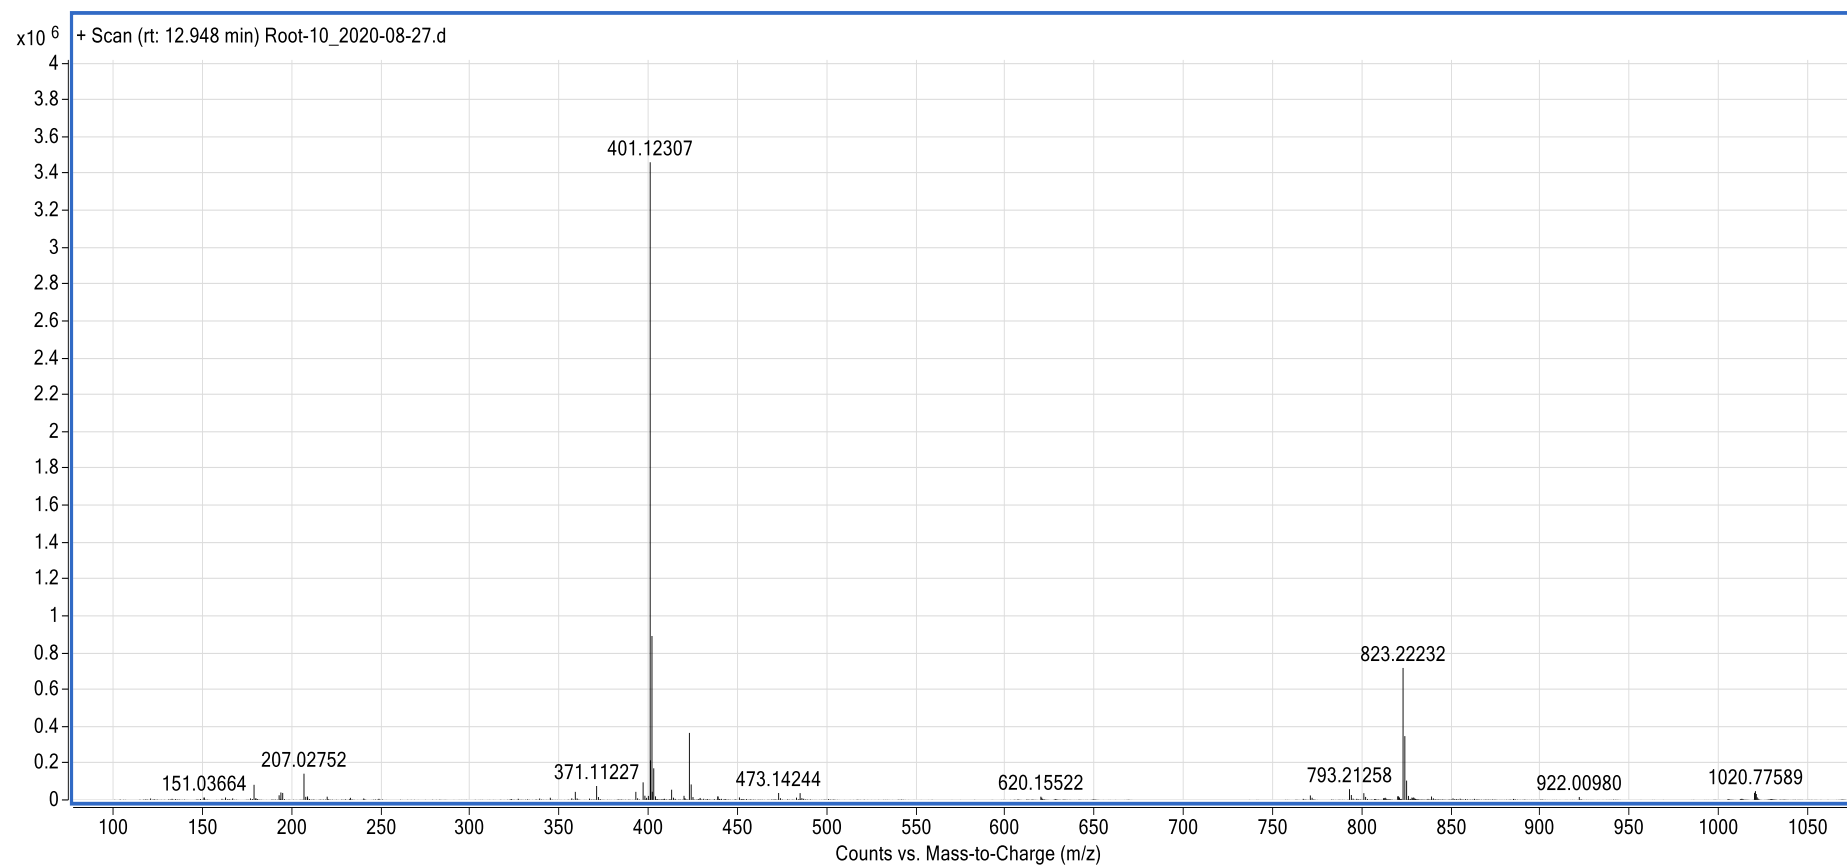

**Figure S37.** HRESI-MS spectrum of the new compound **4**

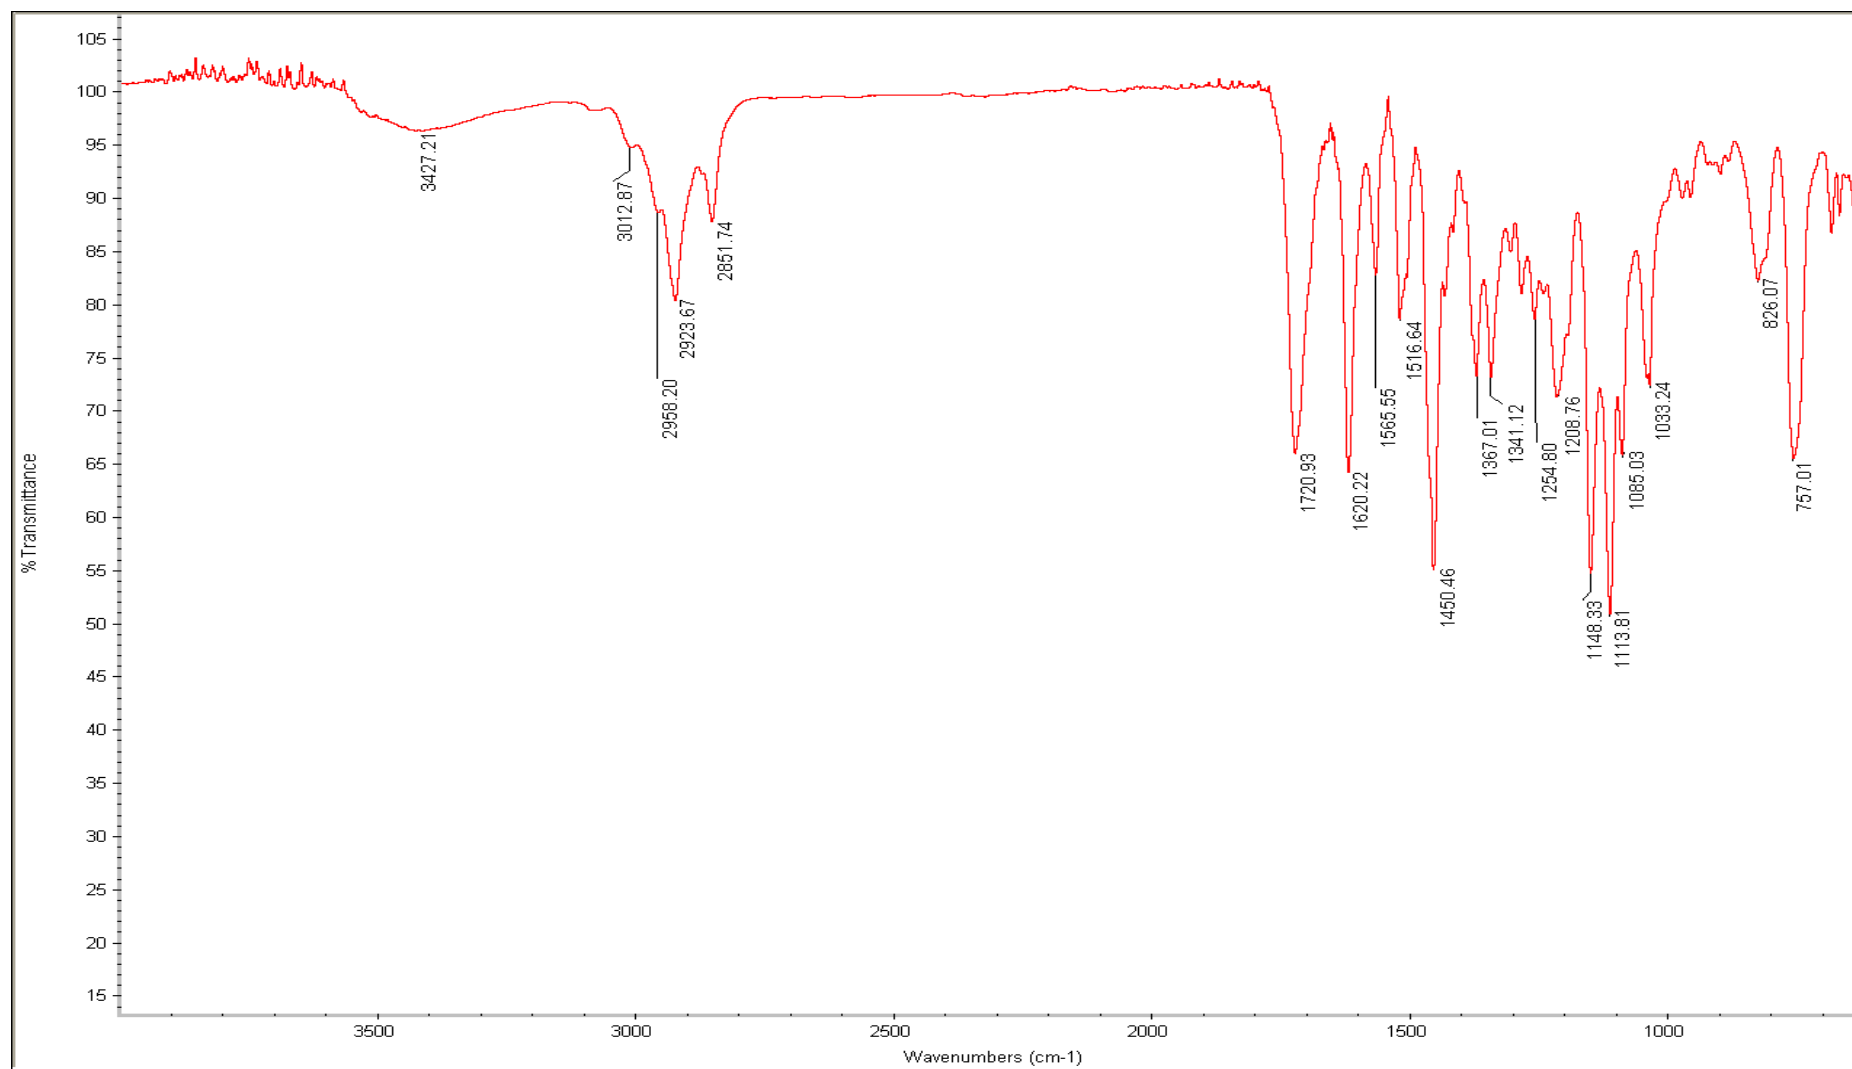

**Figure S38.** IR spectrum of the new compound **4**

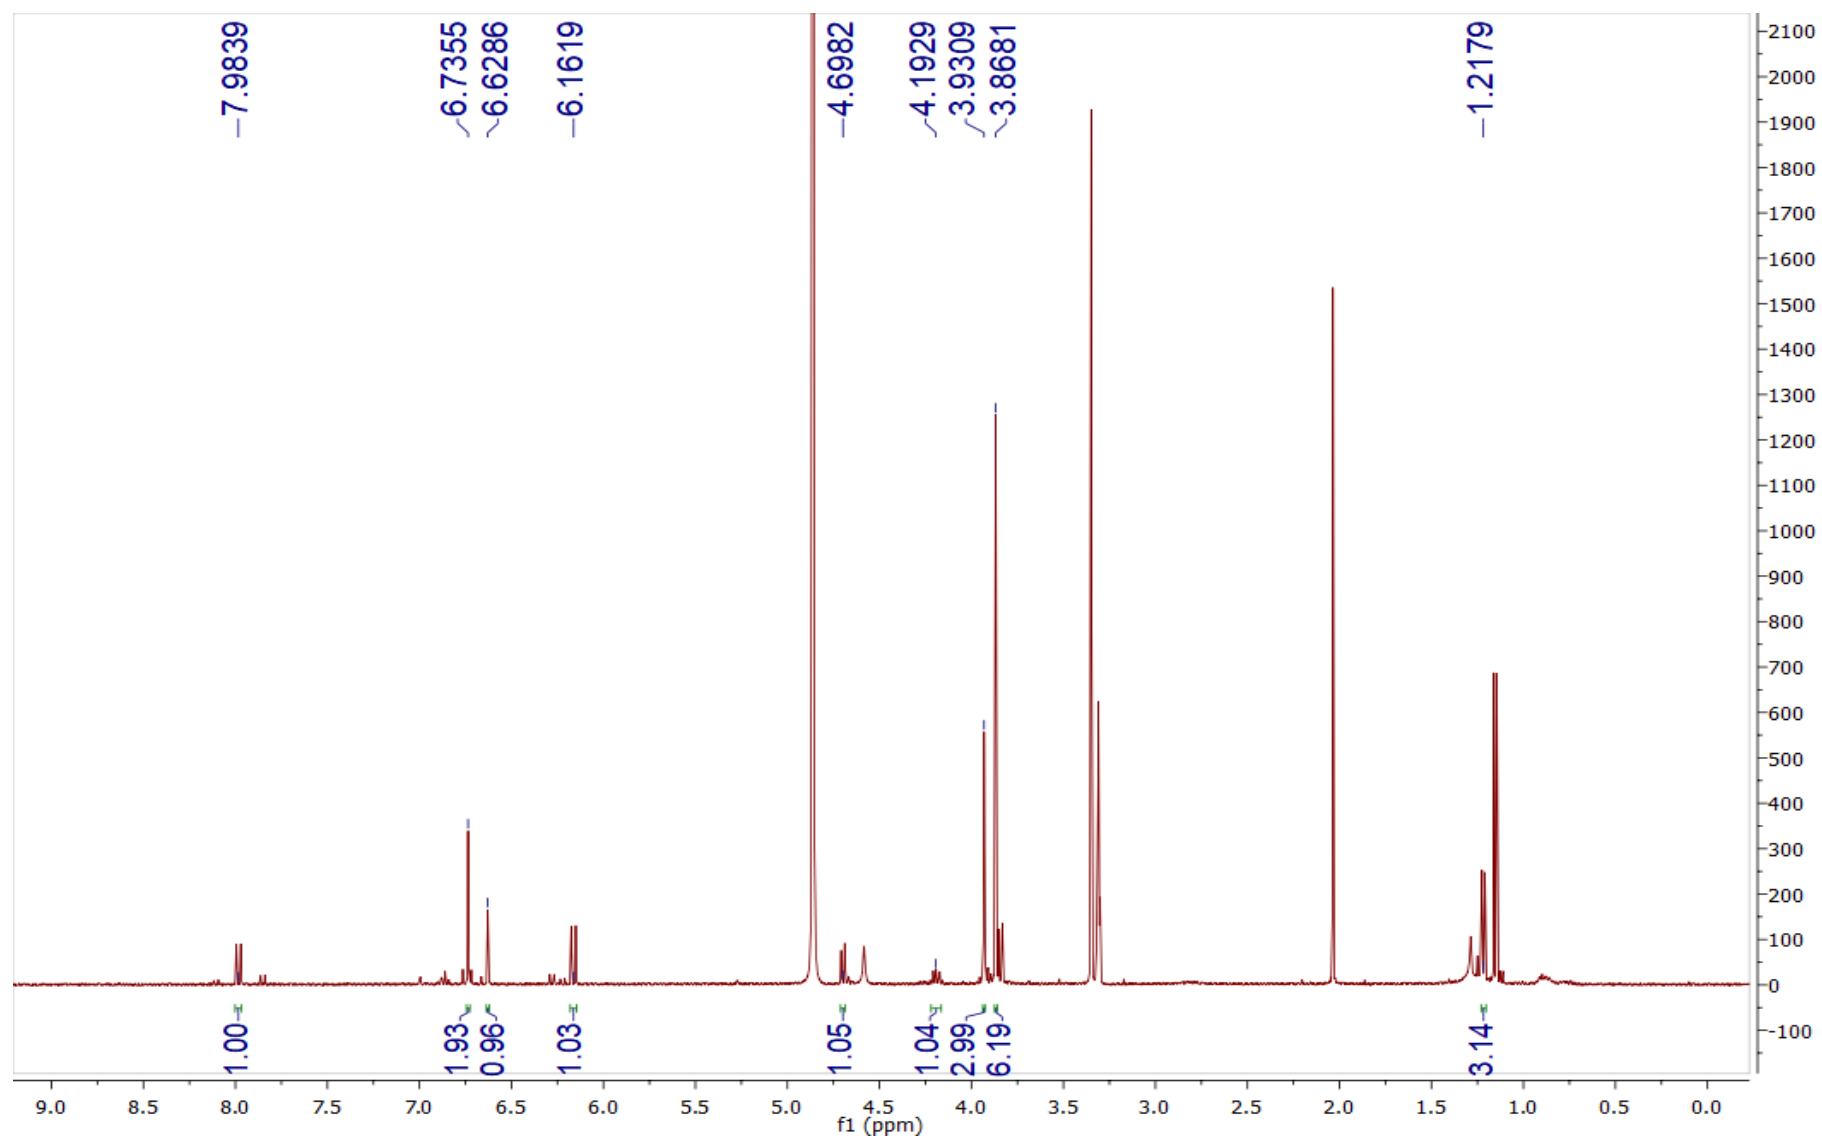

**Figure S39.**  $^1\text{H}$  NMR (400 MHz, MeOD) spectrum of the new compound **4**

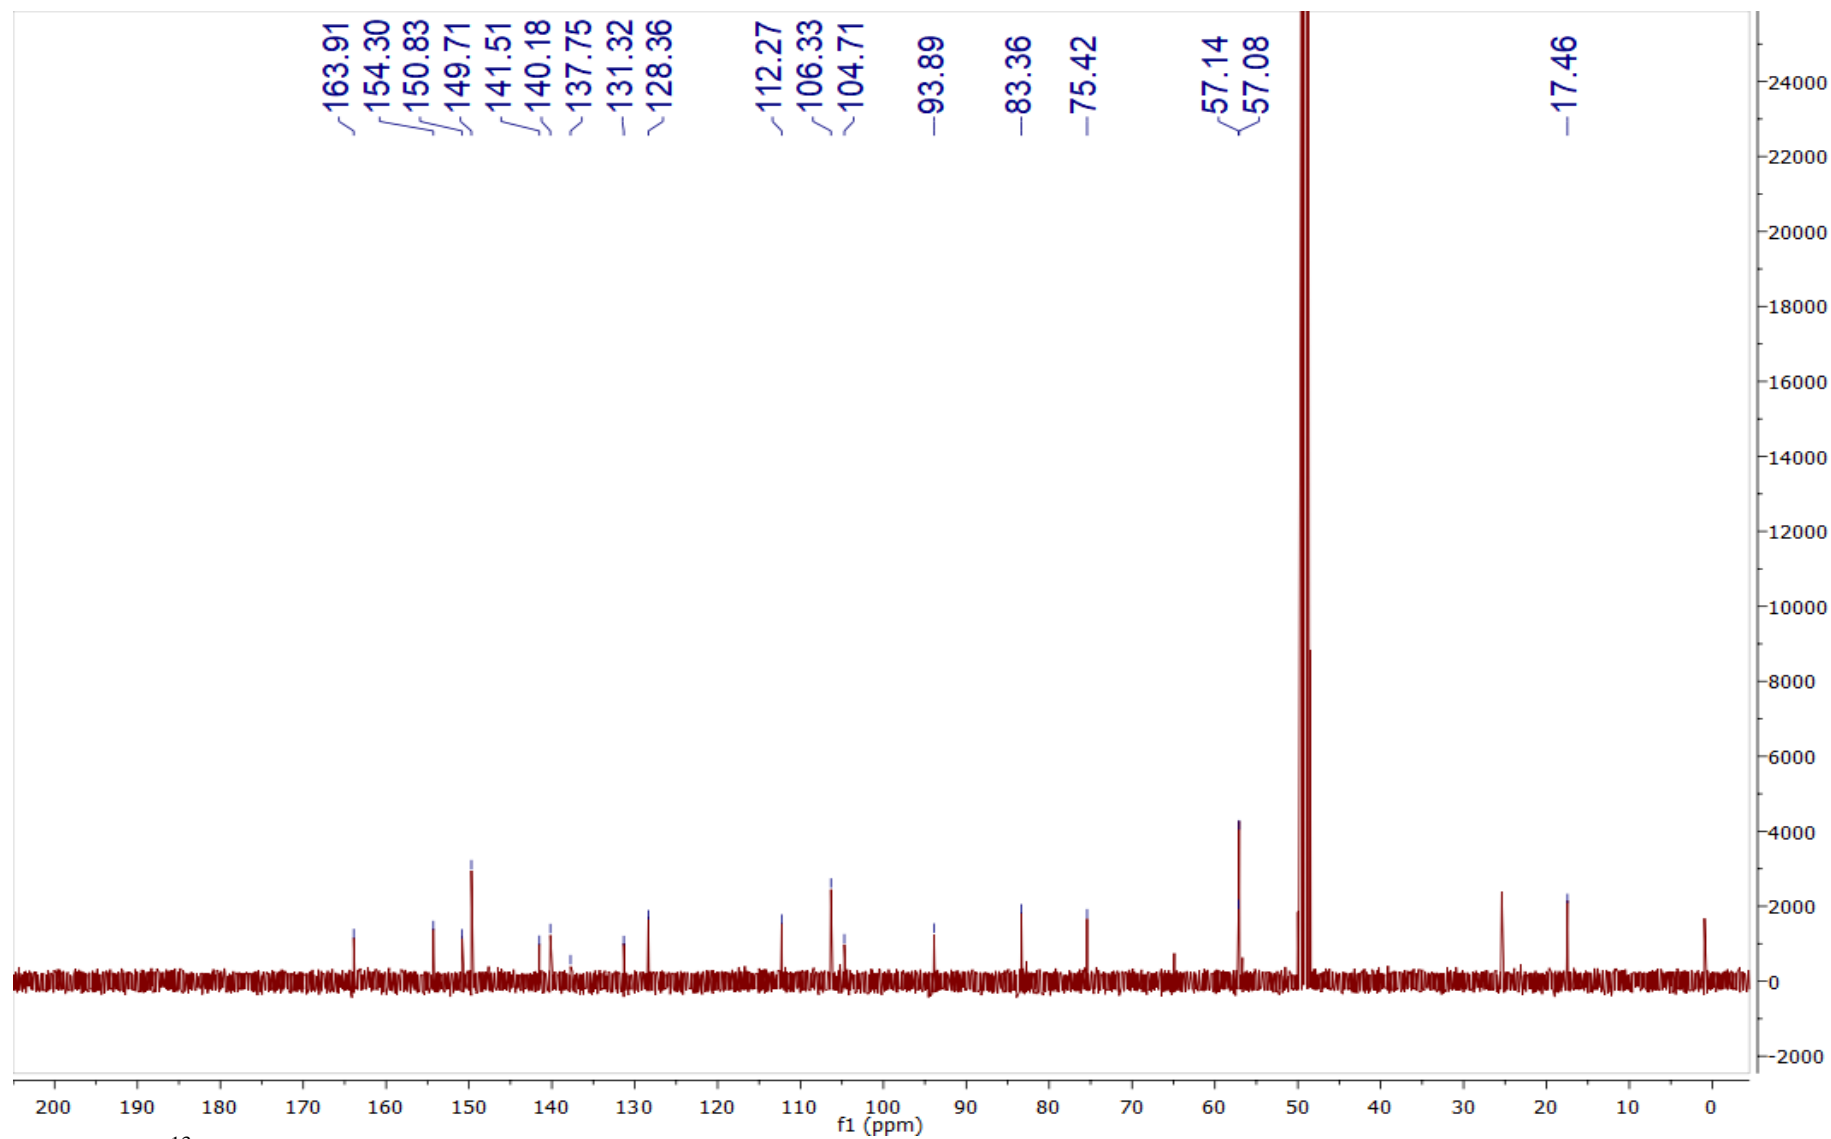

**Figure S40.** <sup>13</sup>C NMR (100 MHz, MeOD) spectrum of the new compound **4**

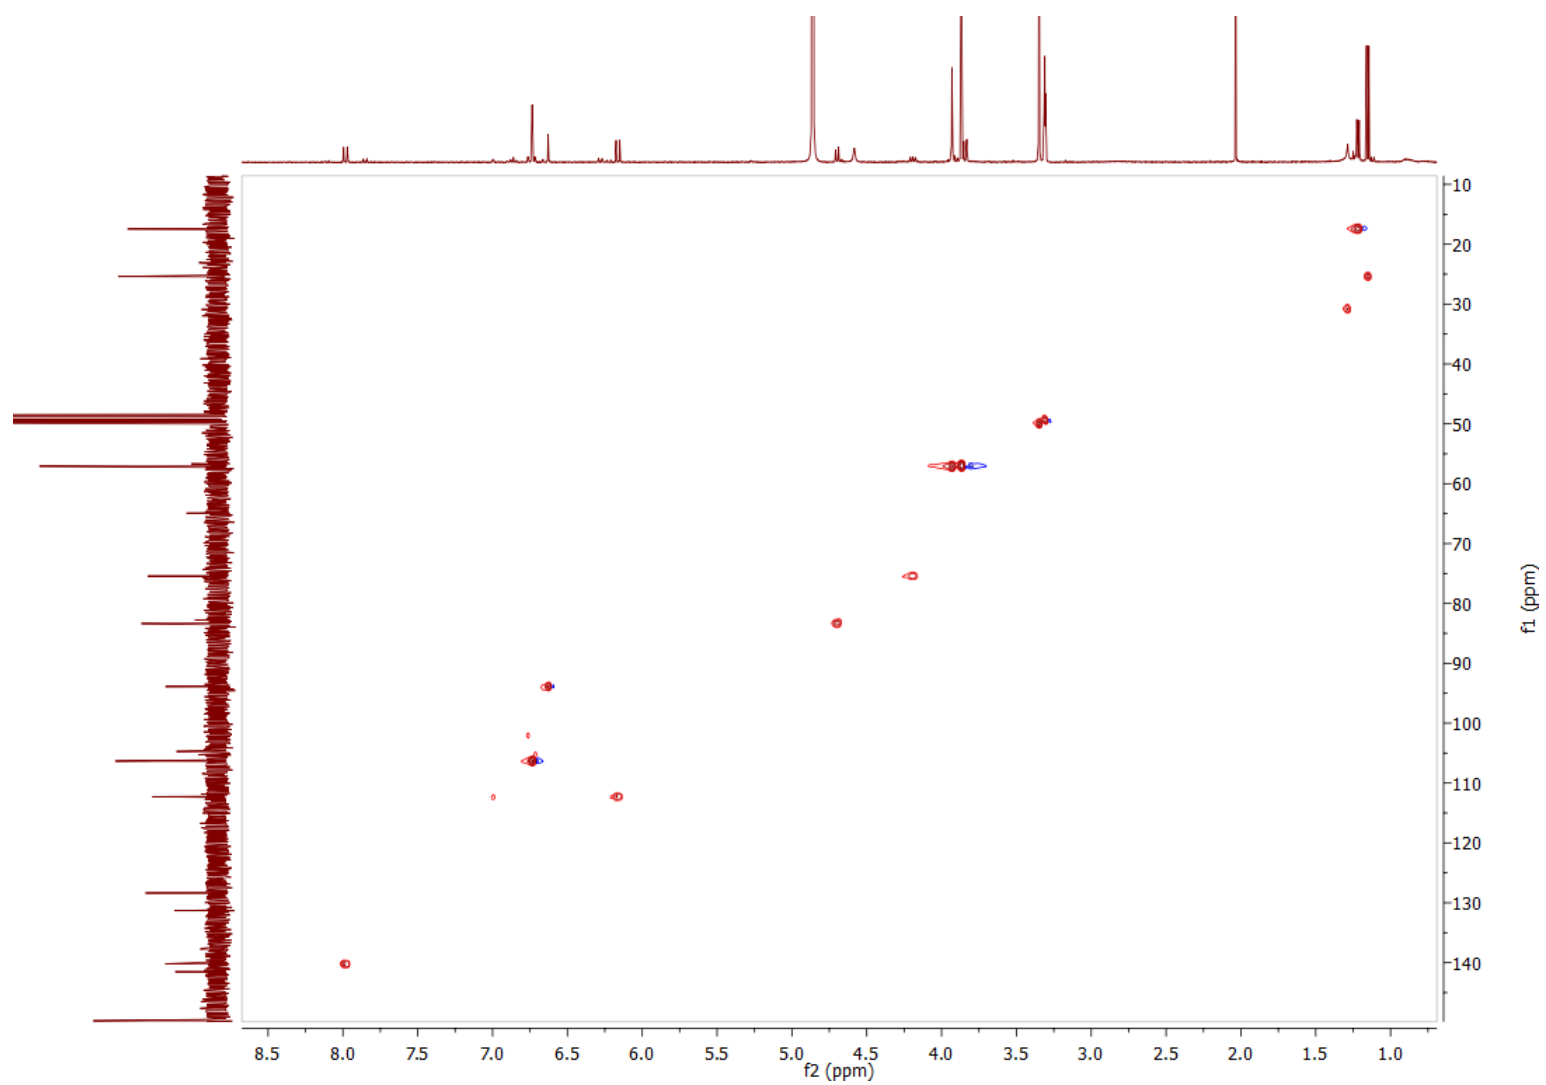

Figure S41. HSQC spectrum of the new compound **4**

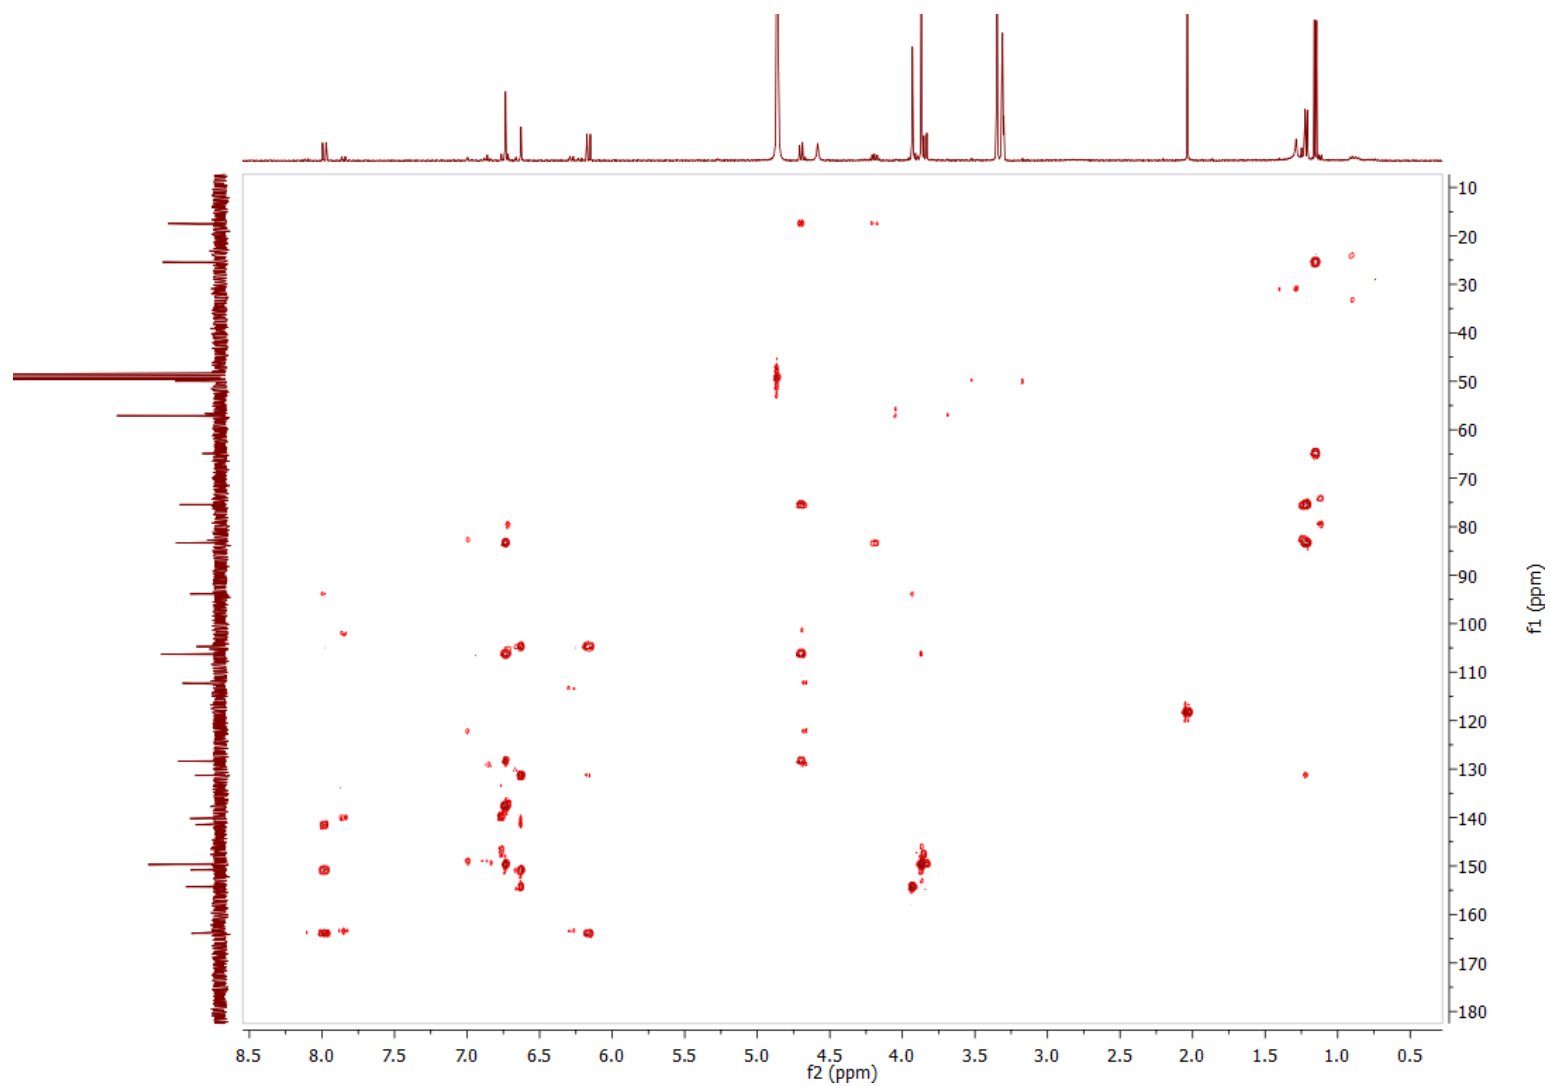

Figure S42. HMBC spectrum of the new compound **4**

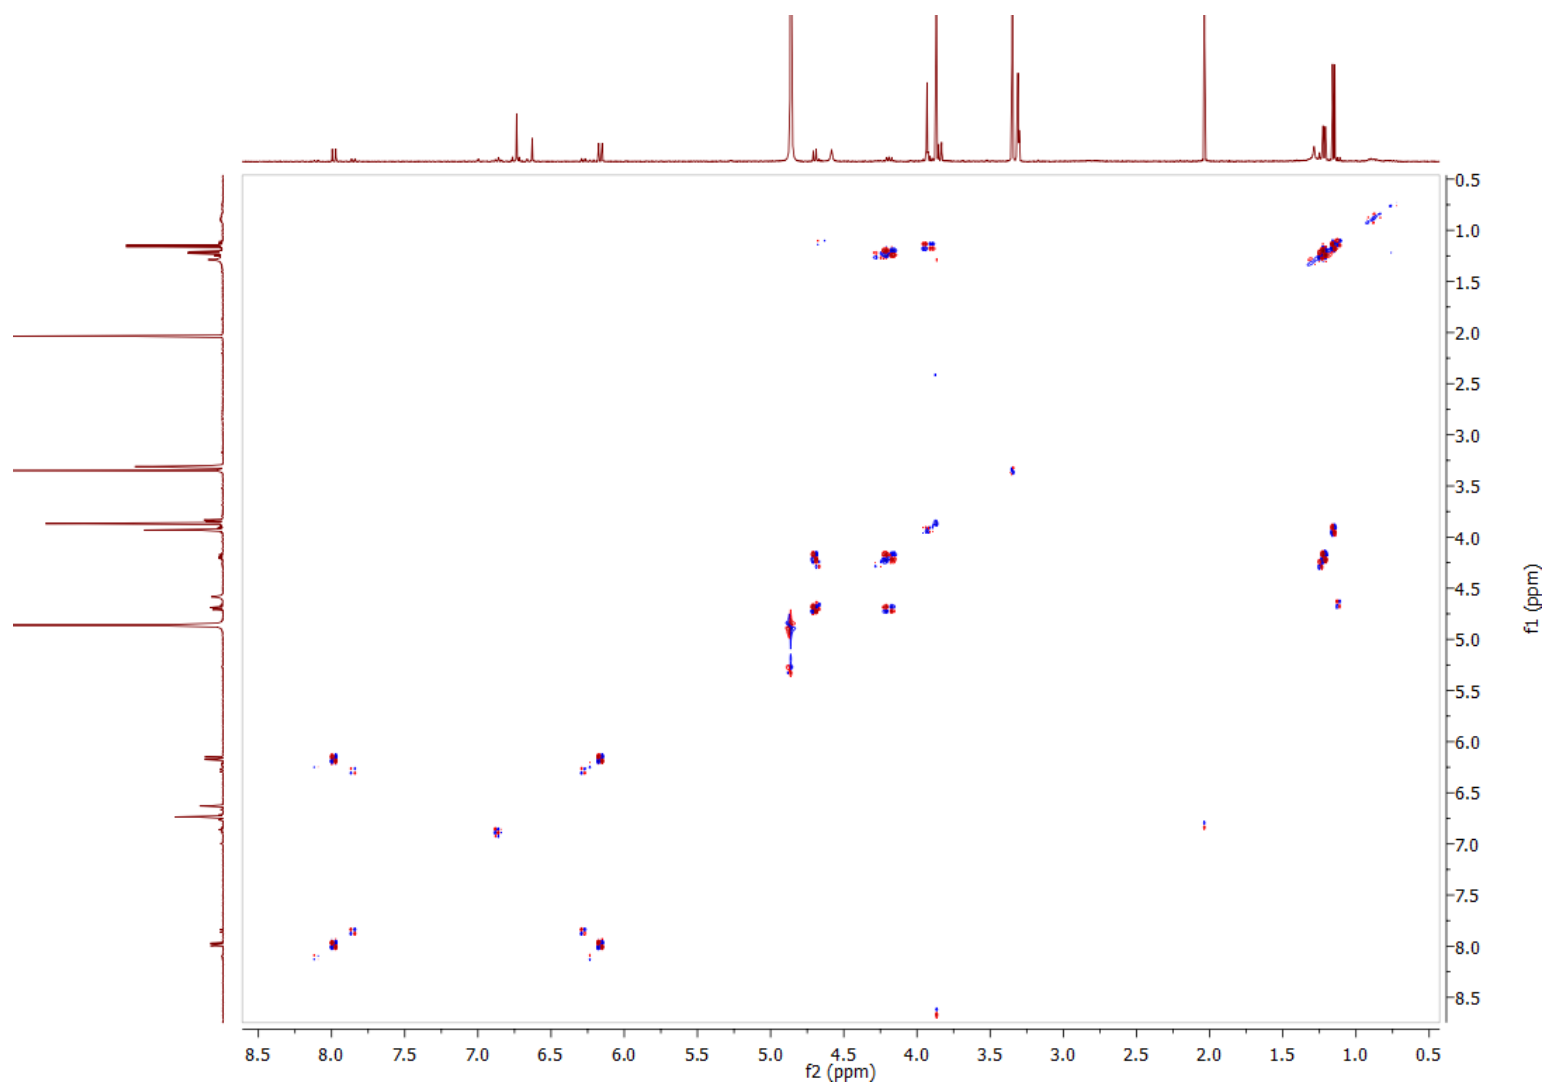

Figure S43. COSY spectrum of the new compound **4**



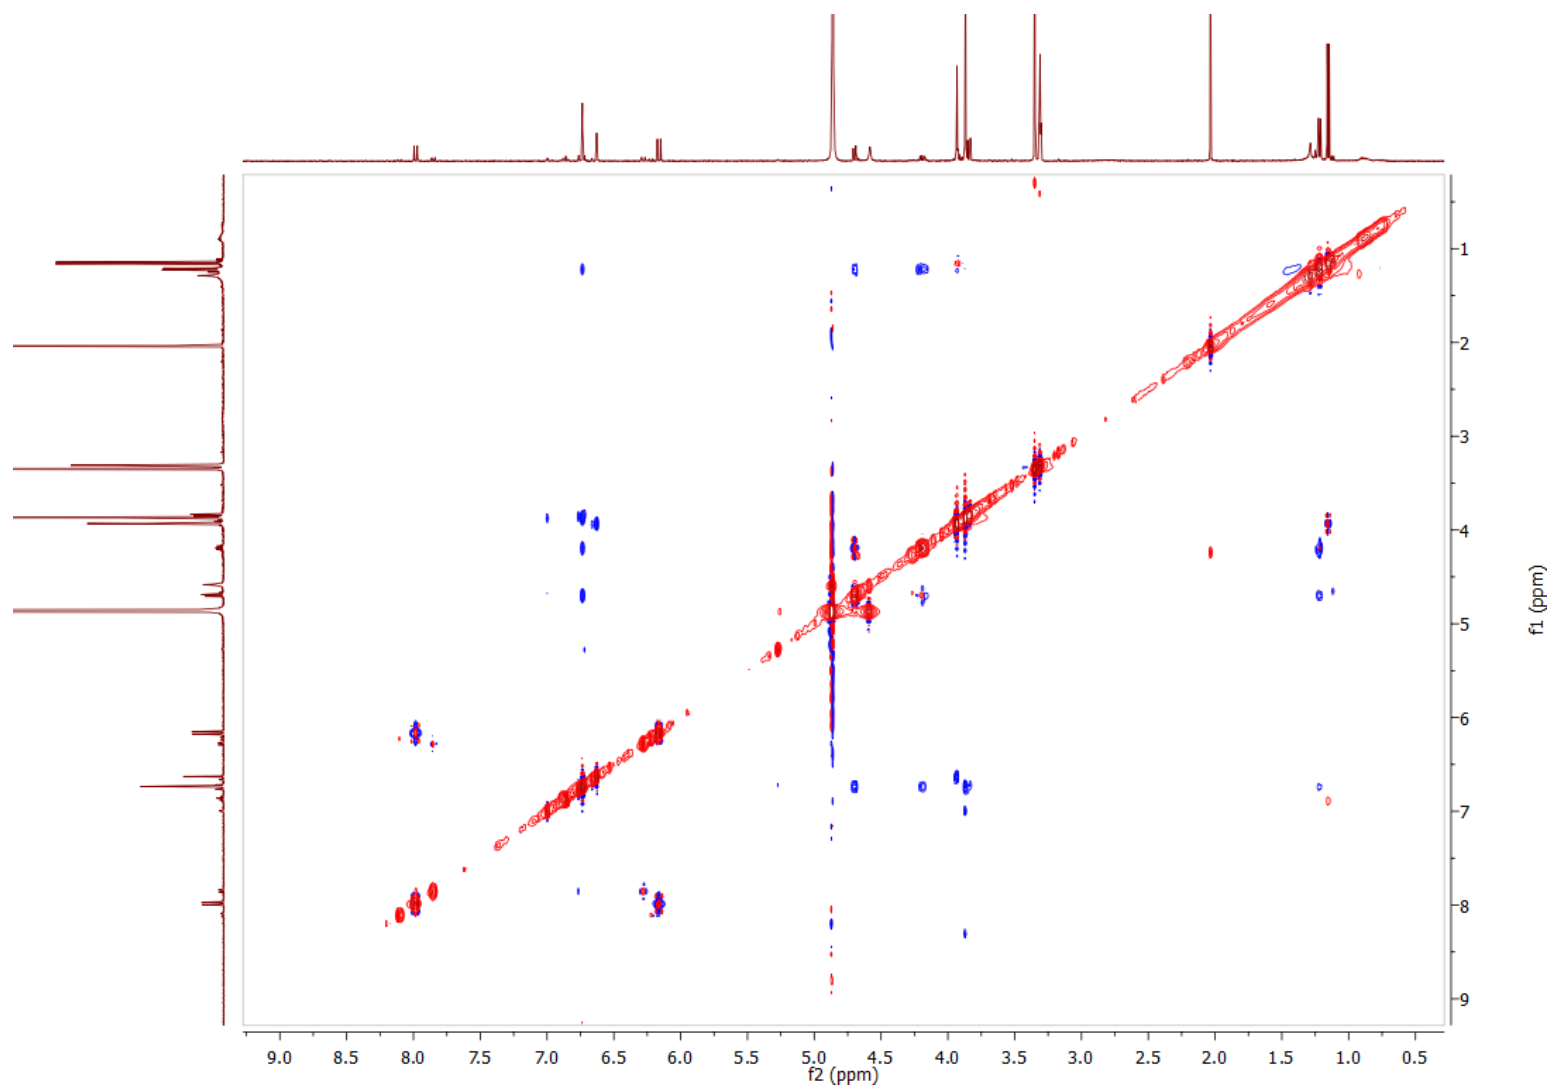

**Figure S44.** NOESY spectrum of the new compound **4**

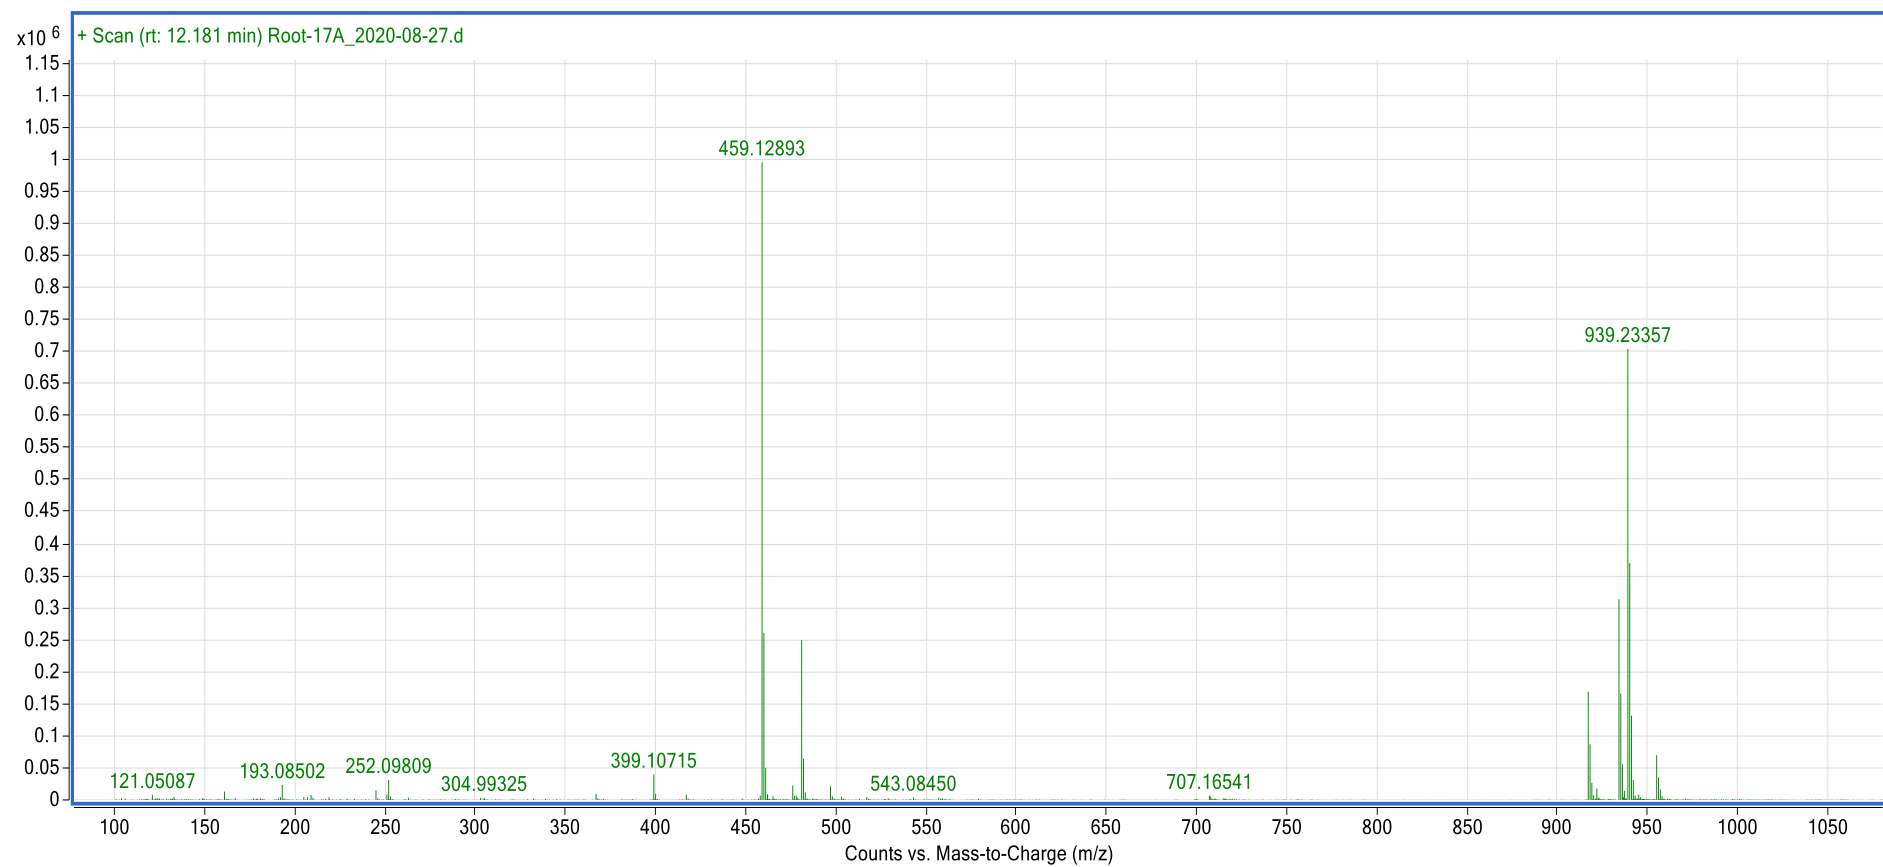

**Figure S45.** HRESI-MS spectrum of the new compound **5**

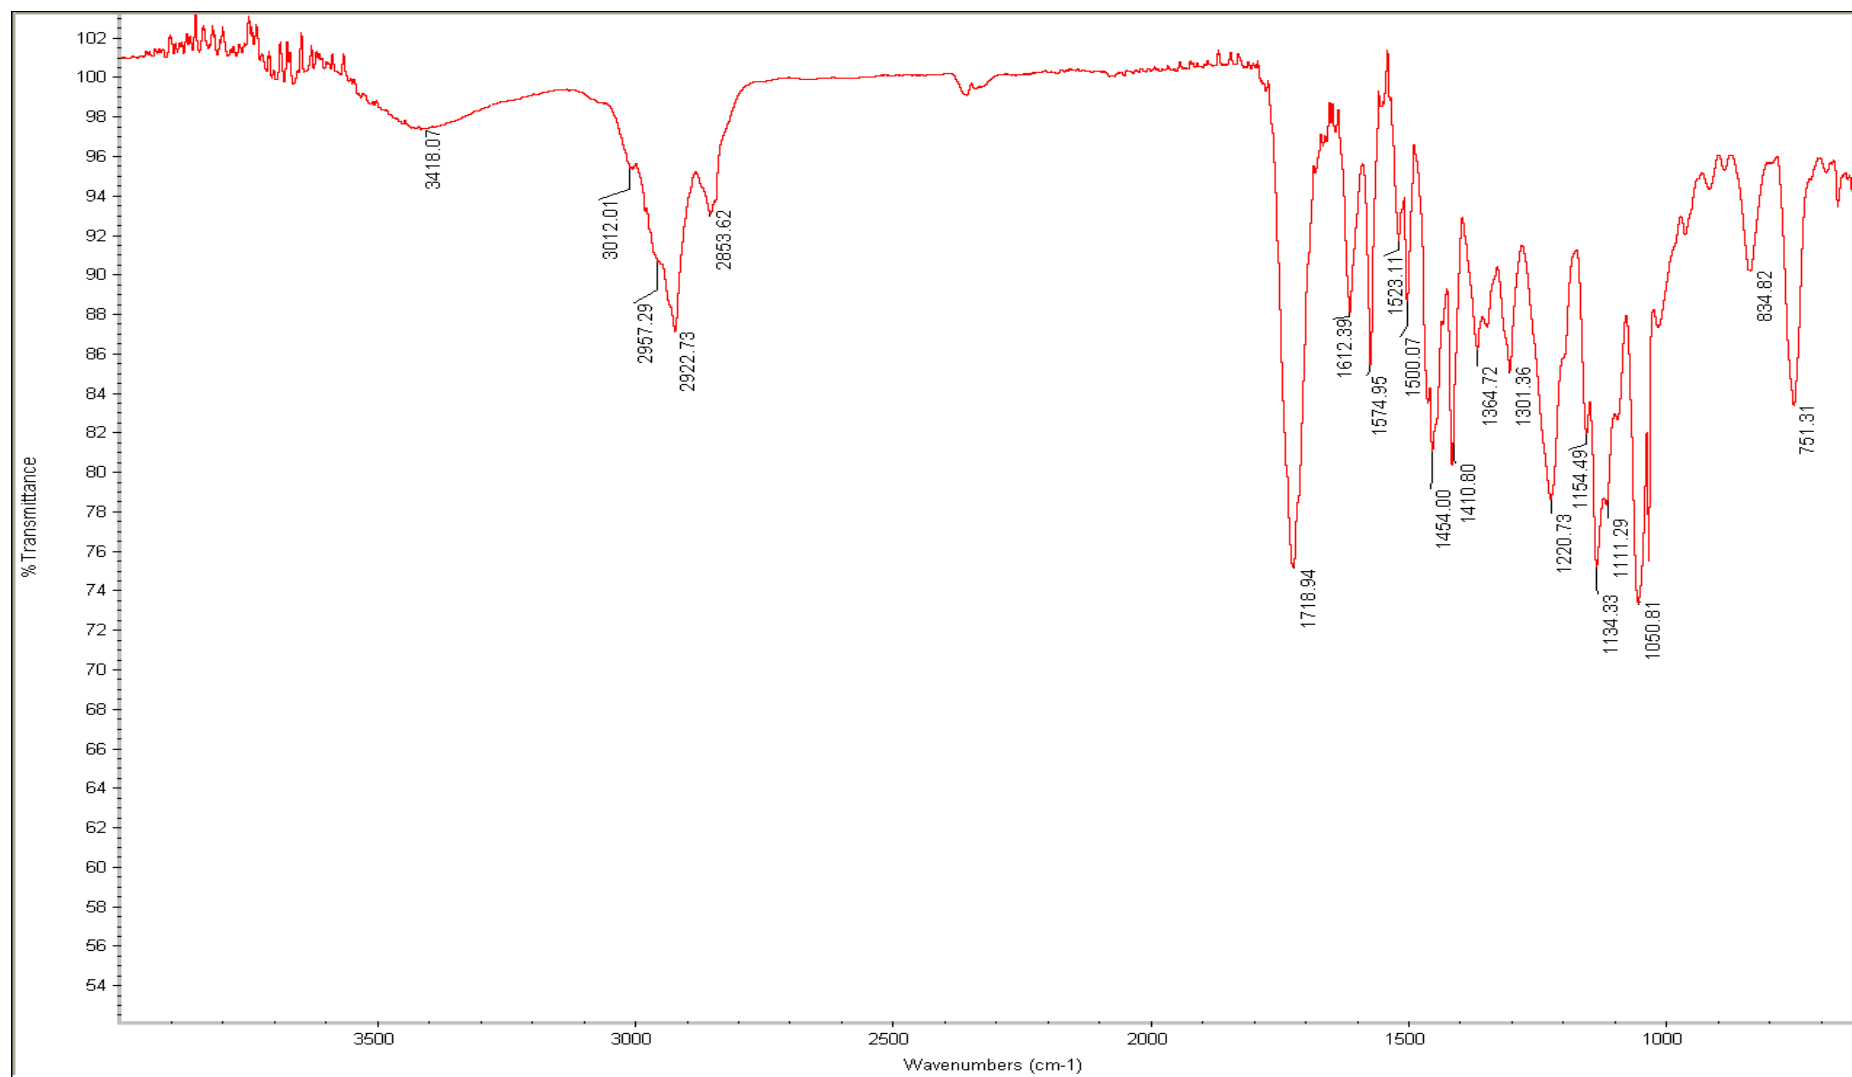

Figure S46. IR spectrum of the new compound **5**

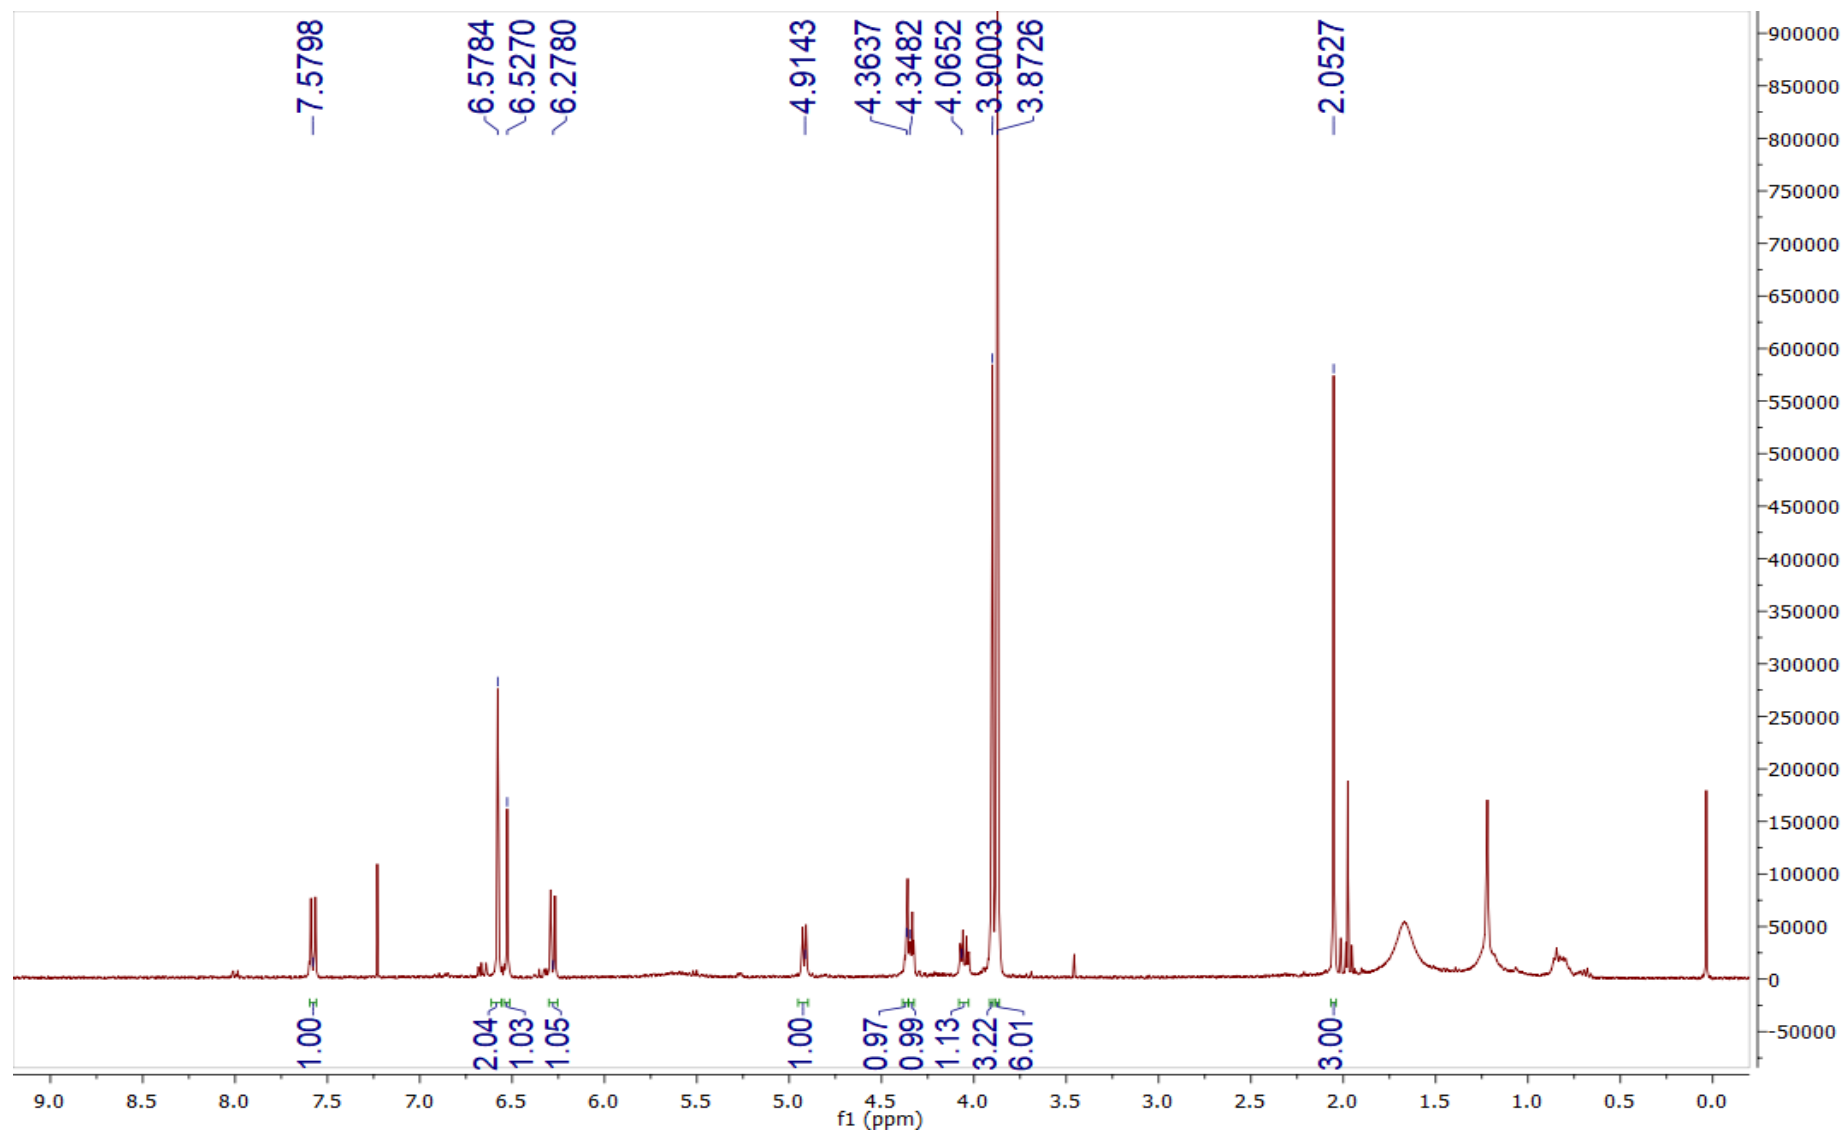

**Figure S47.**  $^1\text{H}$  NMR (400 MHz,  $\text{CDCl}_3$ ) spectrum of the new compound **5**

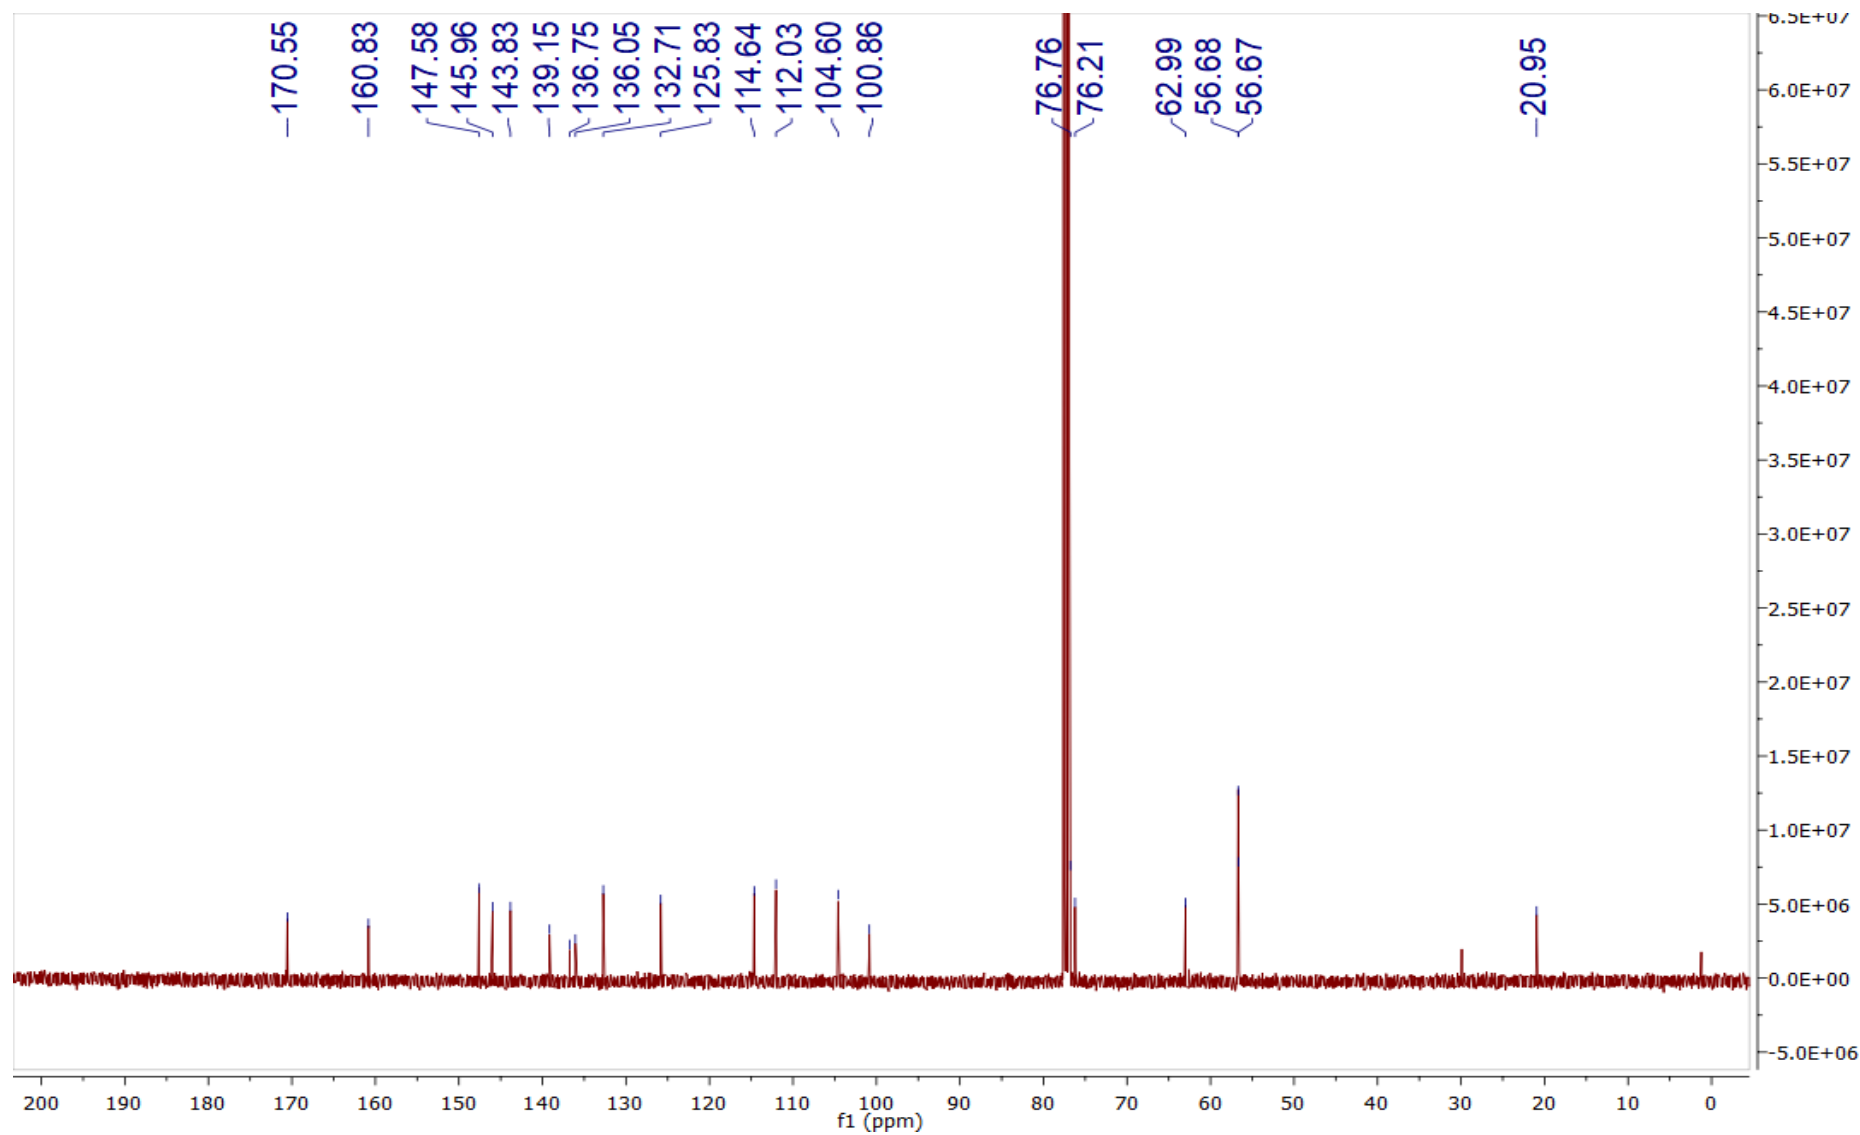

Figure S48. <sup>13</sup>C NMR (100 MHz, CDCl<sub>3</sub>) spectrum of the new compound **5**

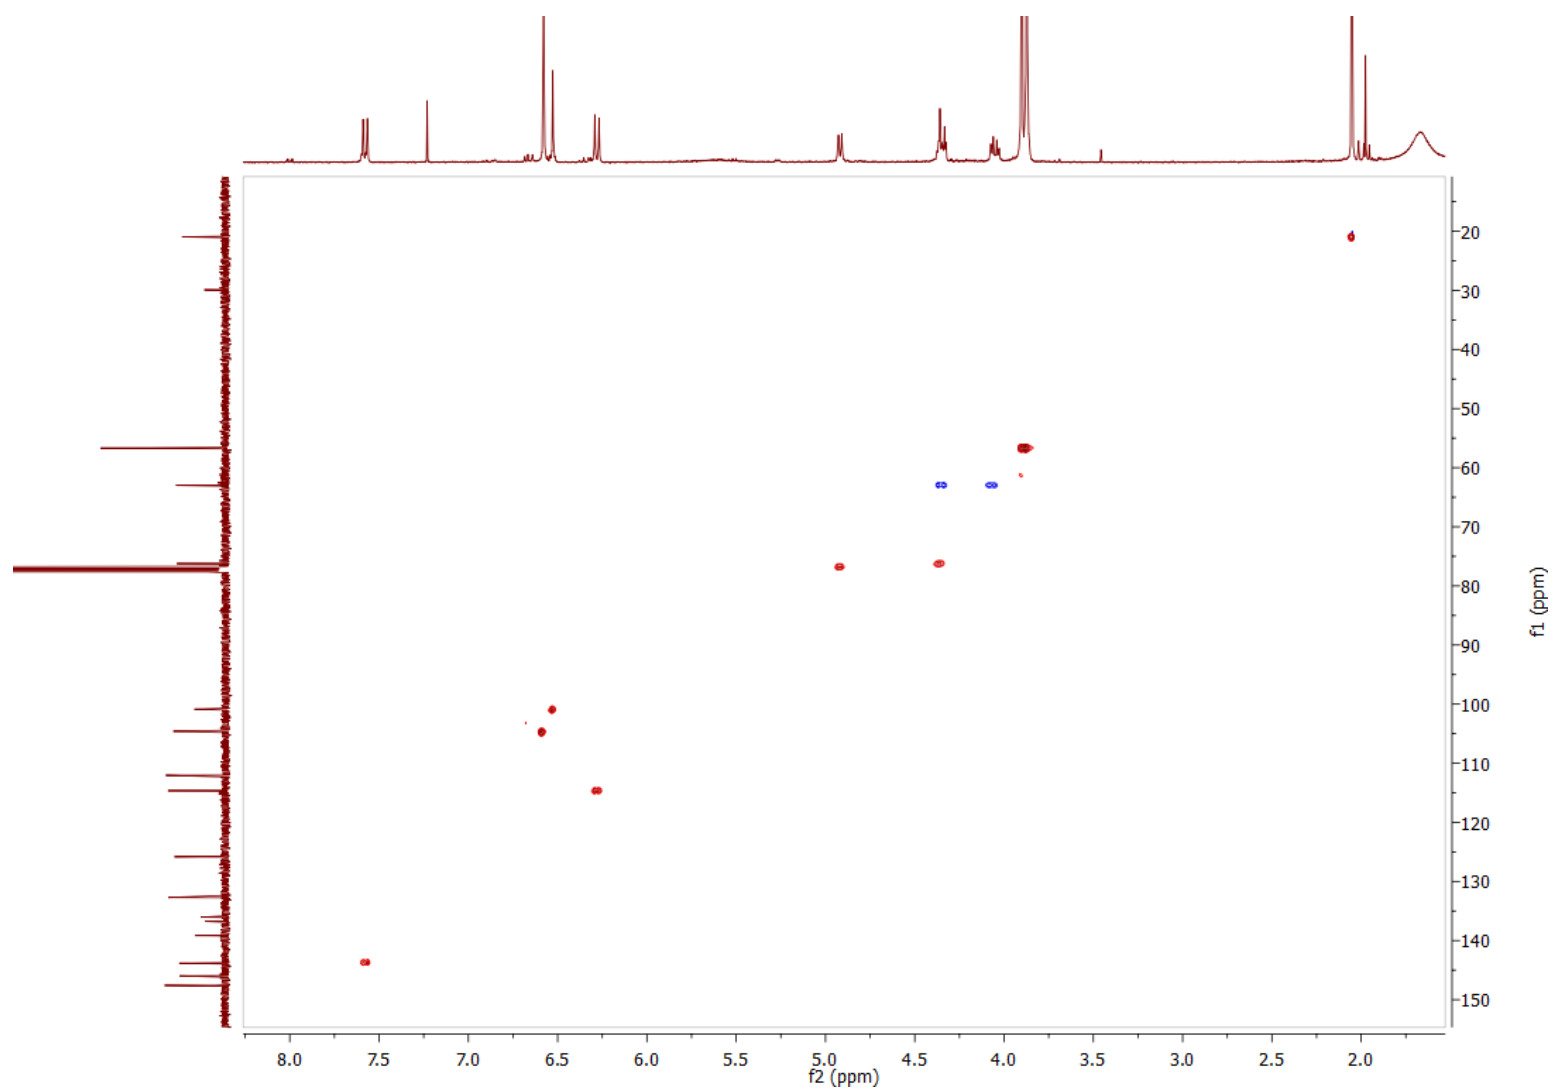

Figure S49. HSQC spectrum of the new compound **5**

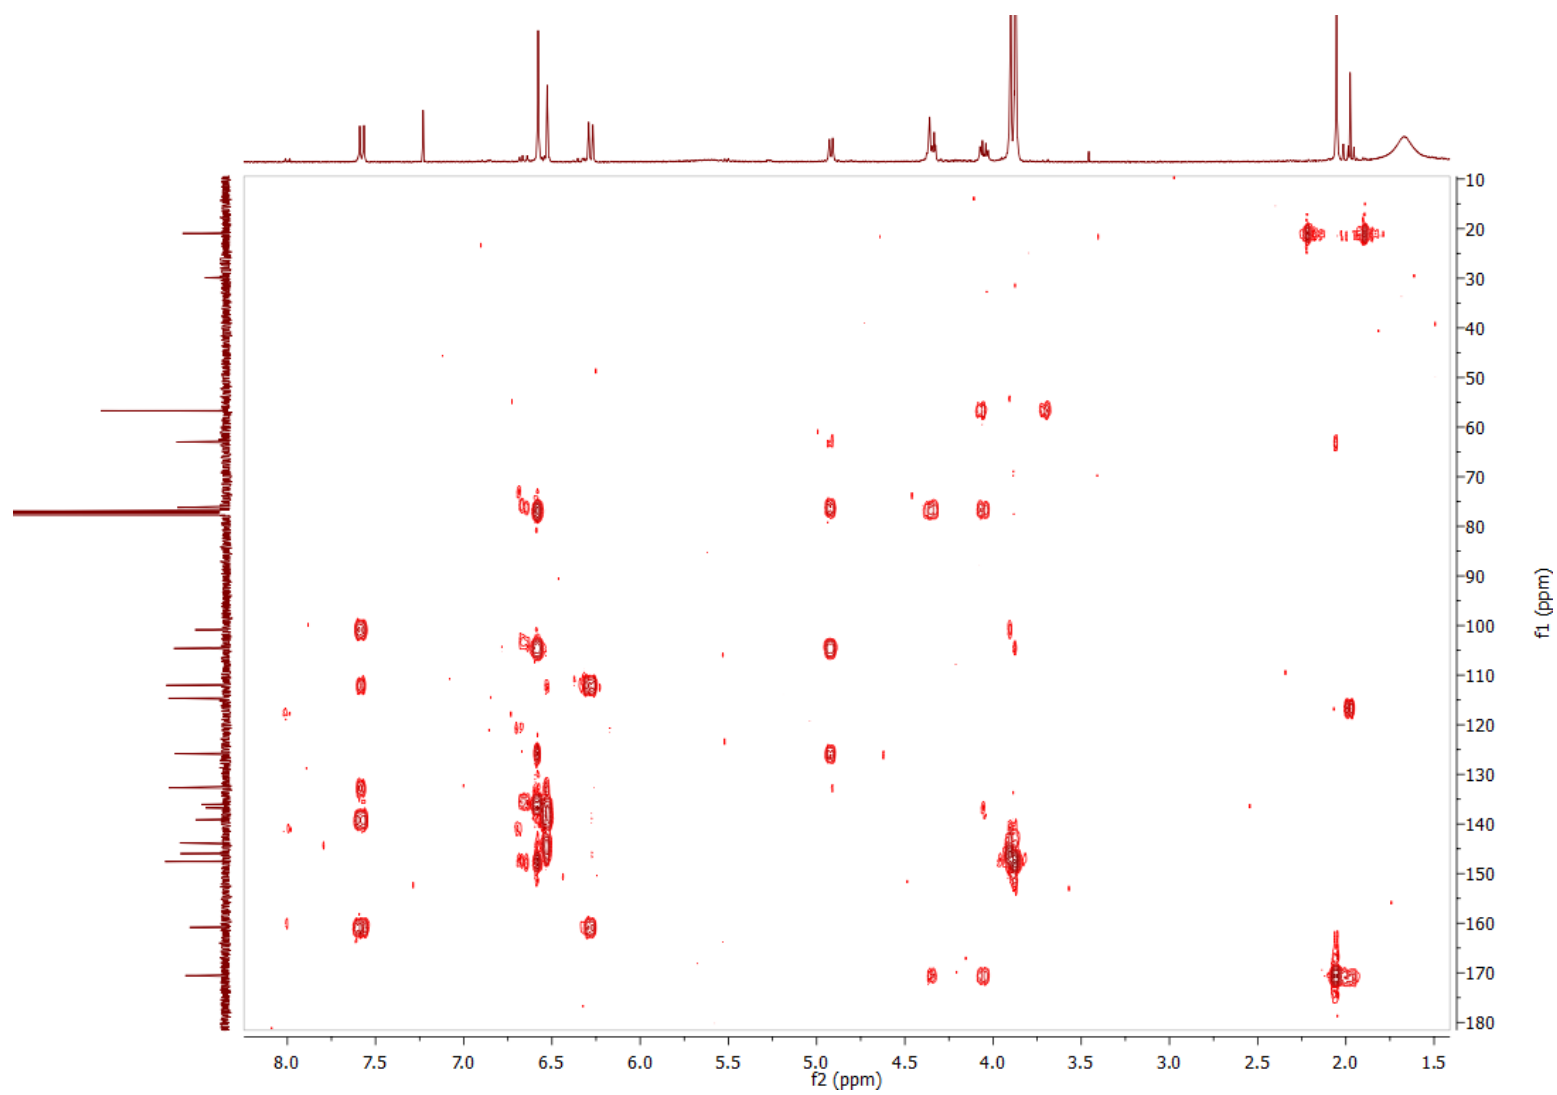

Figure S50. HMBC spectrum of the new compound **5**

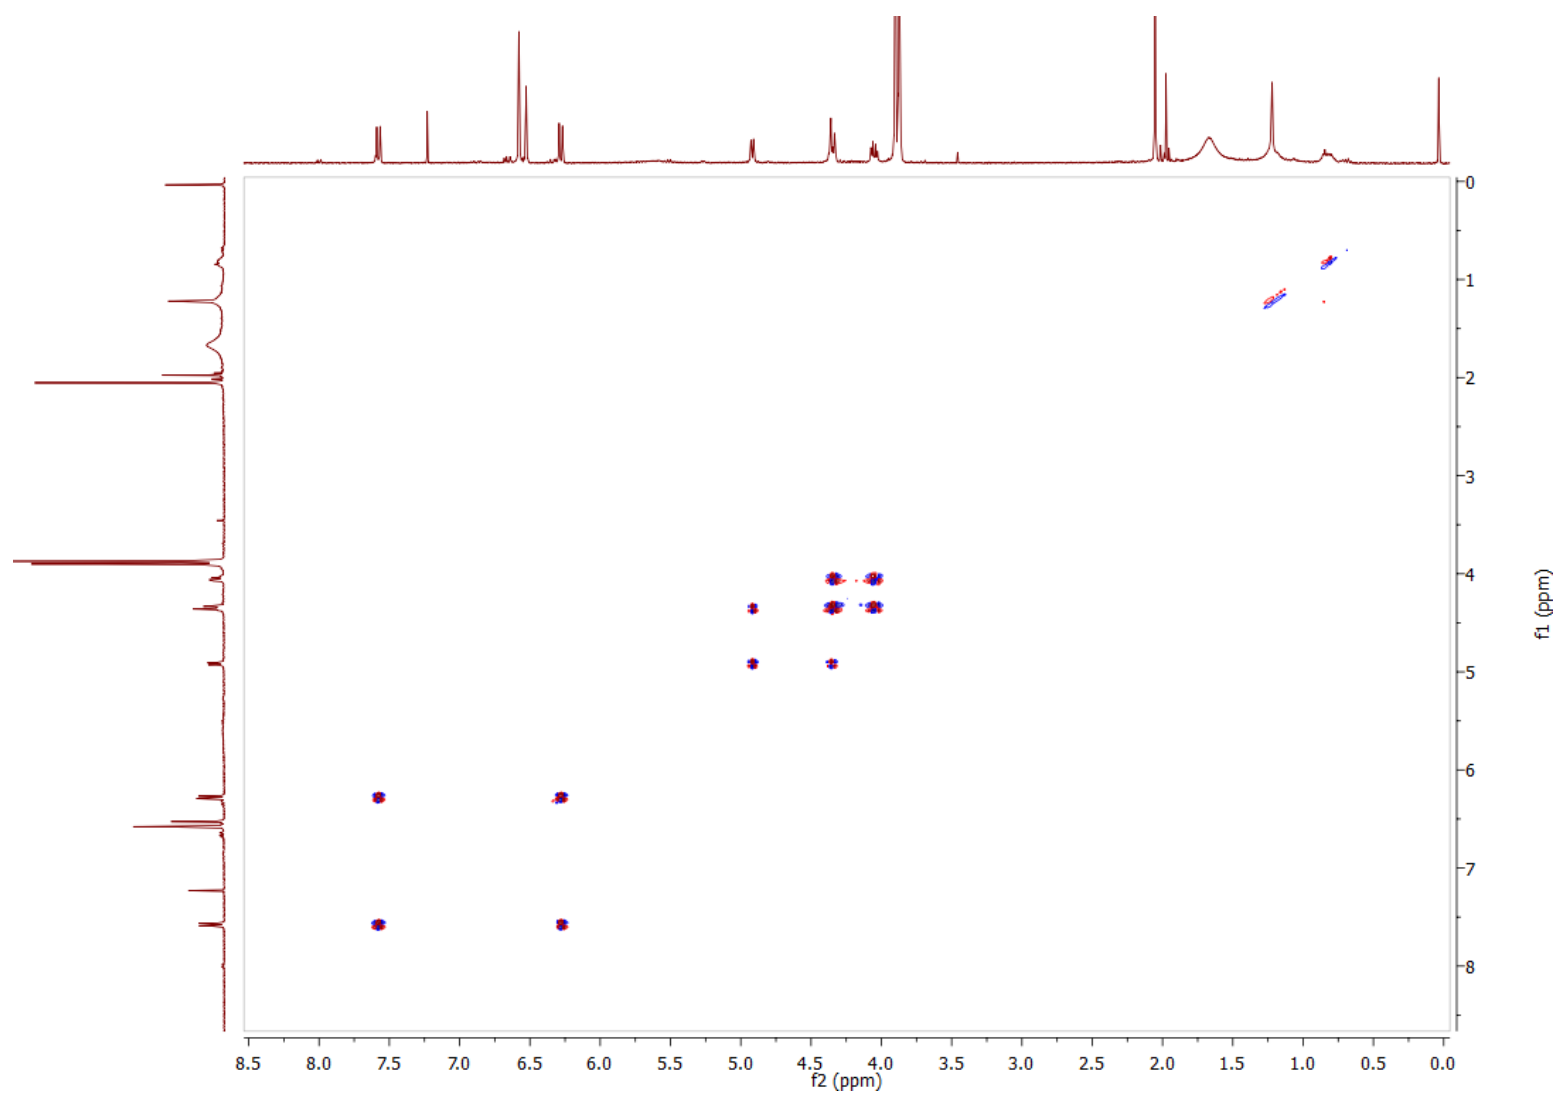

**Figure S51.** COSY spectrum of the new compound **5**



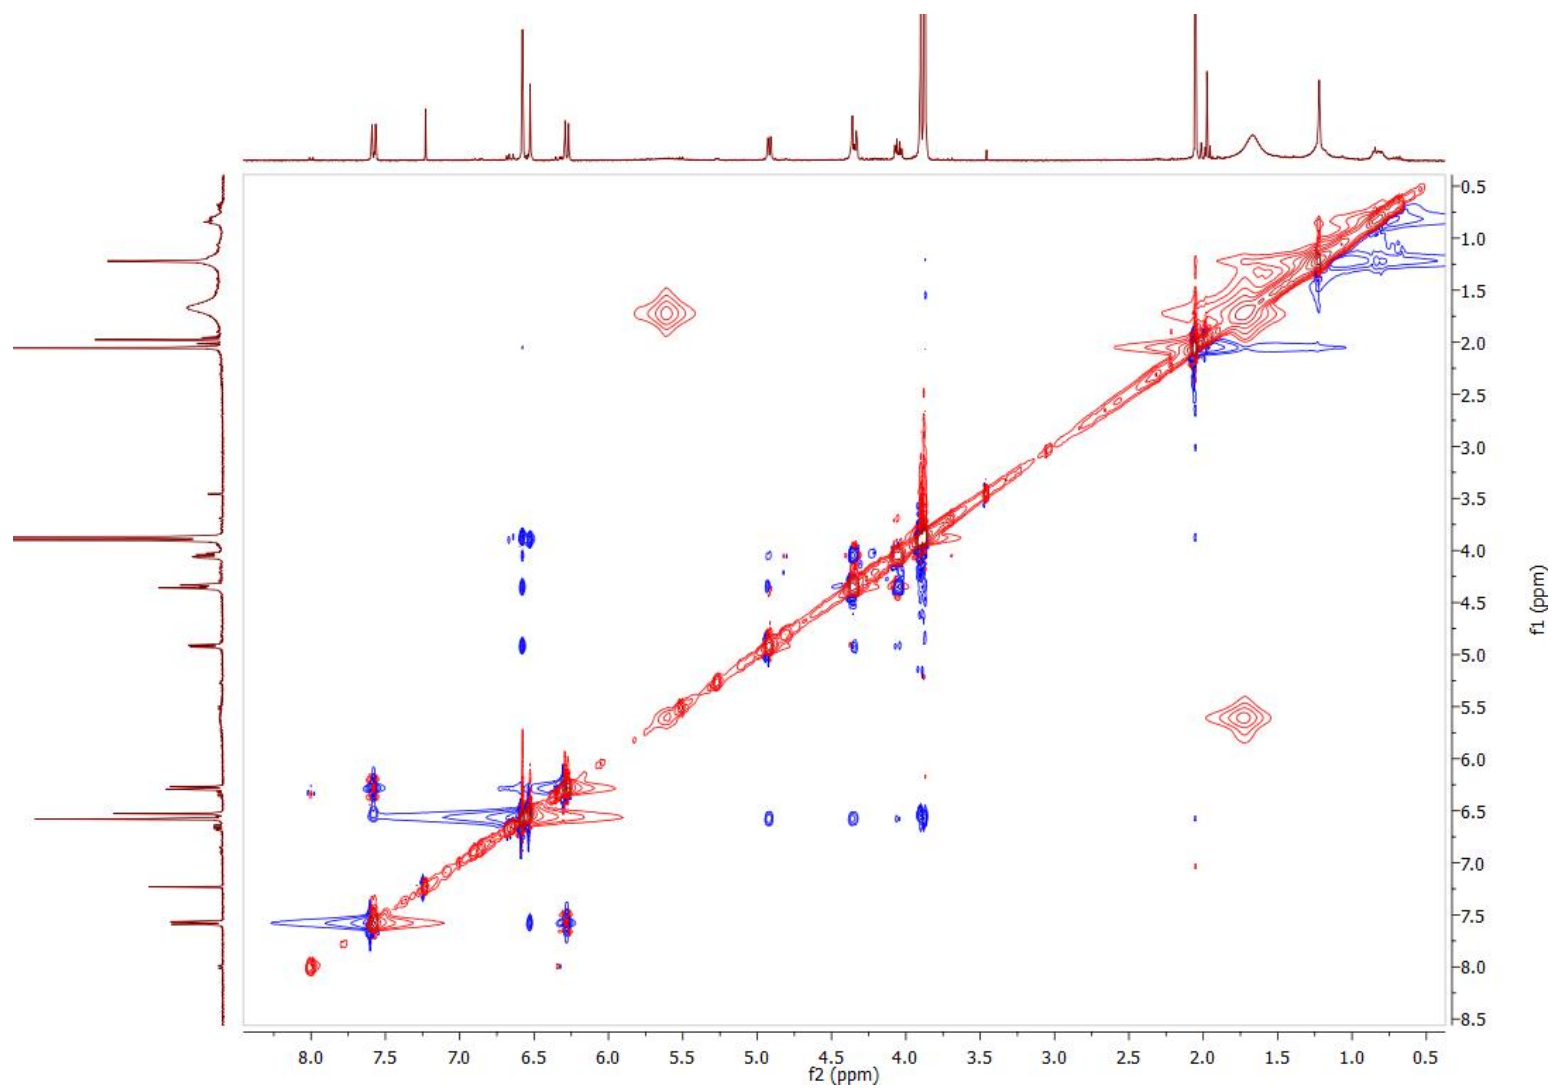

**Figure S52.** NOESY spectrum of the new compound **5**

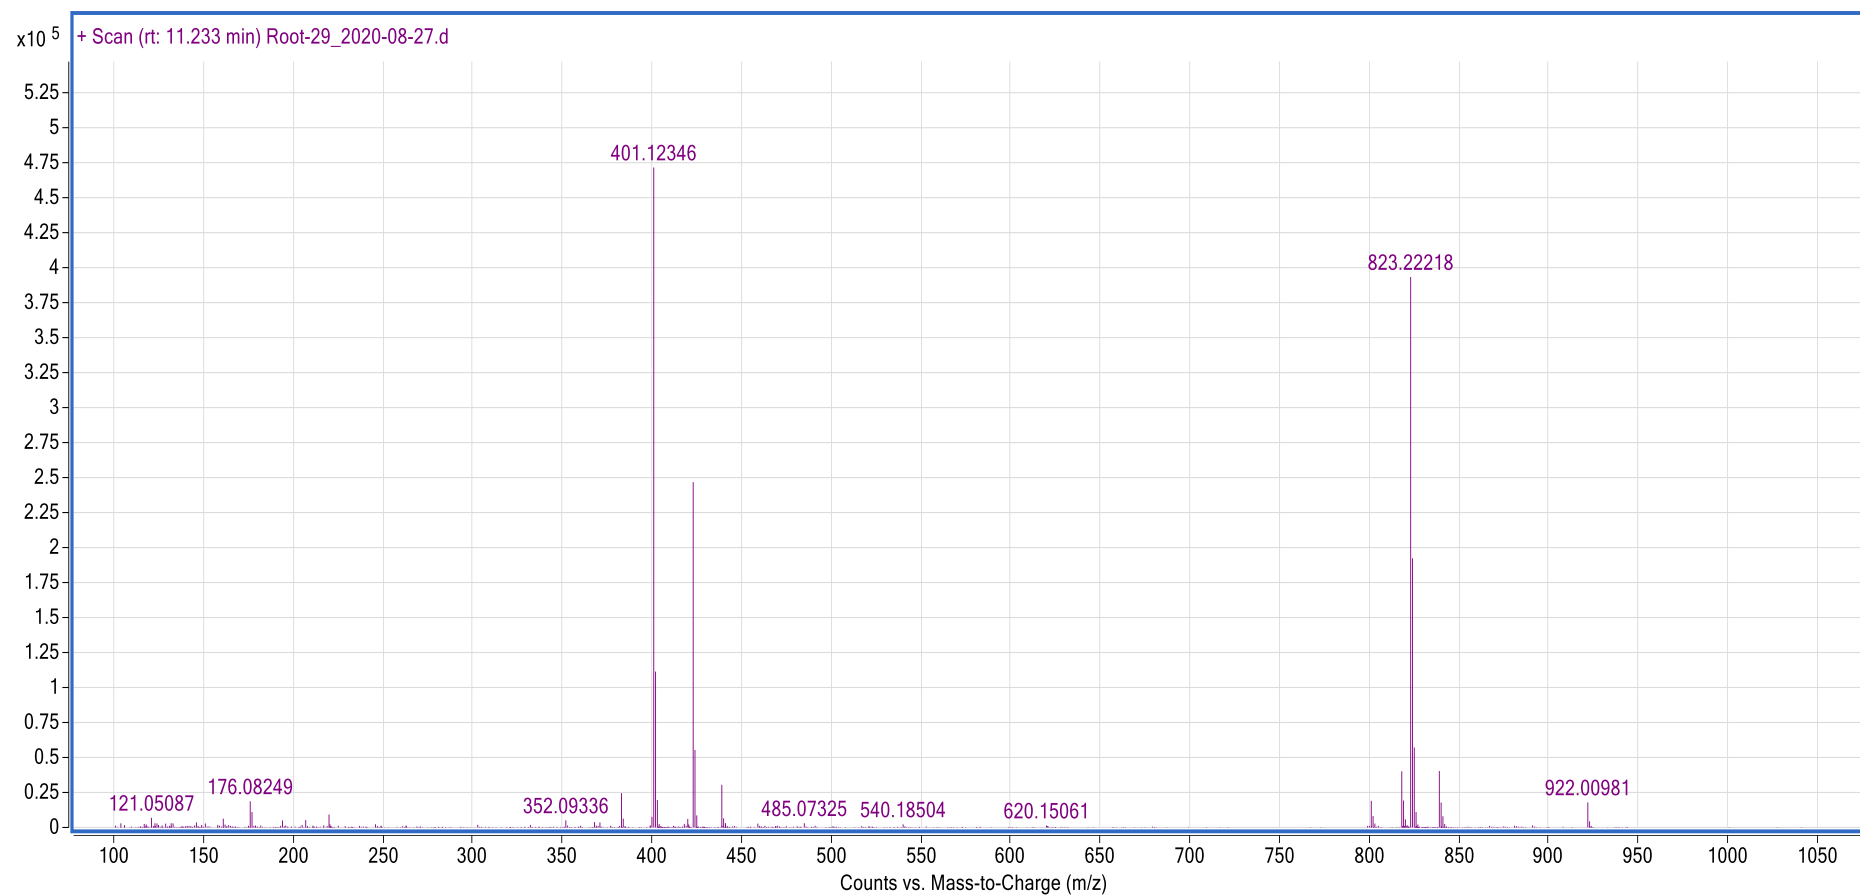

**Figure S53.** HRESI-MS spectrum of the new compound **7**

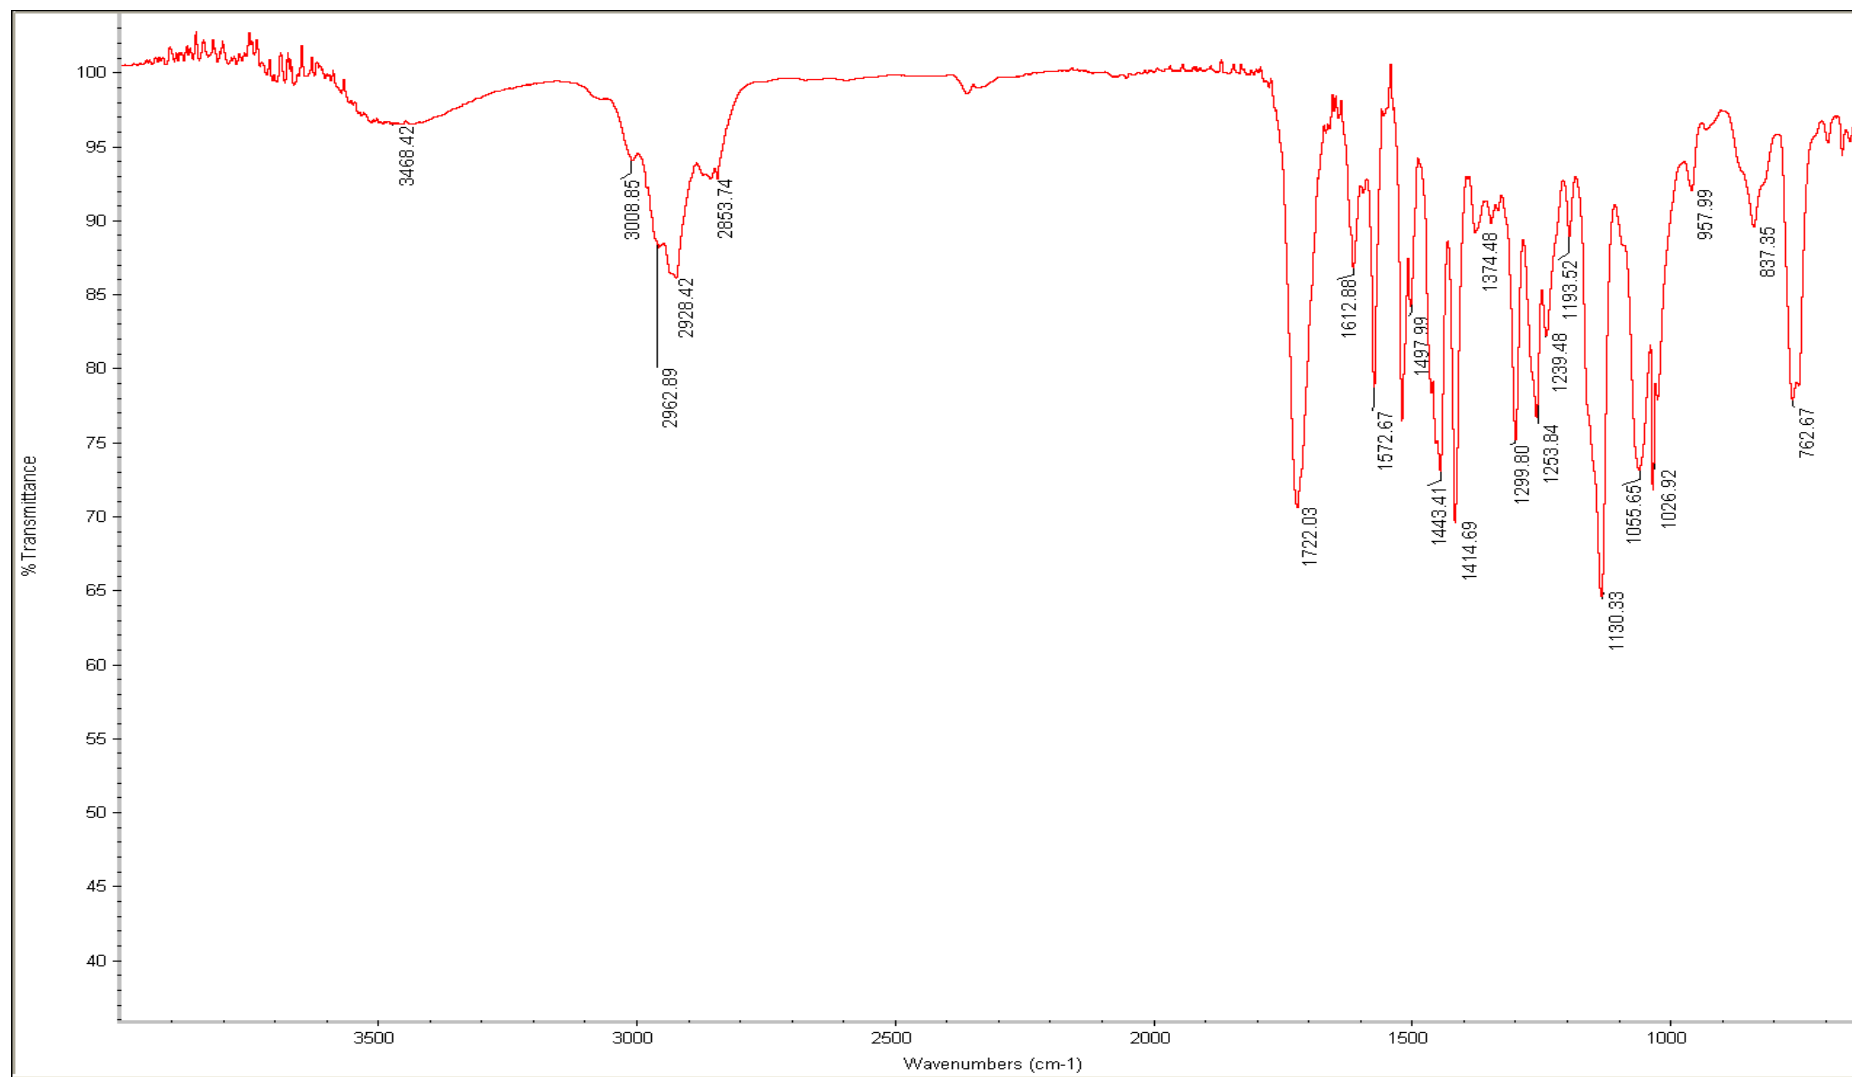

Figure S54. IR spectrum of the new compound **7**

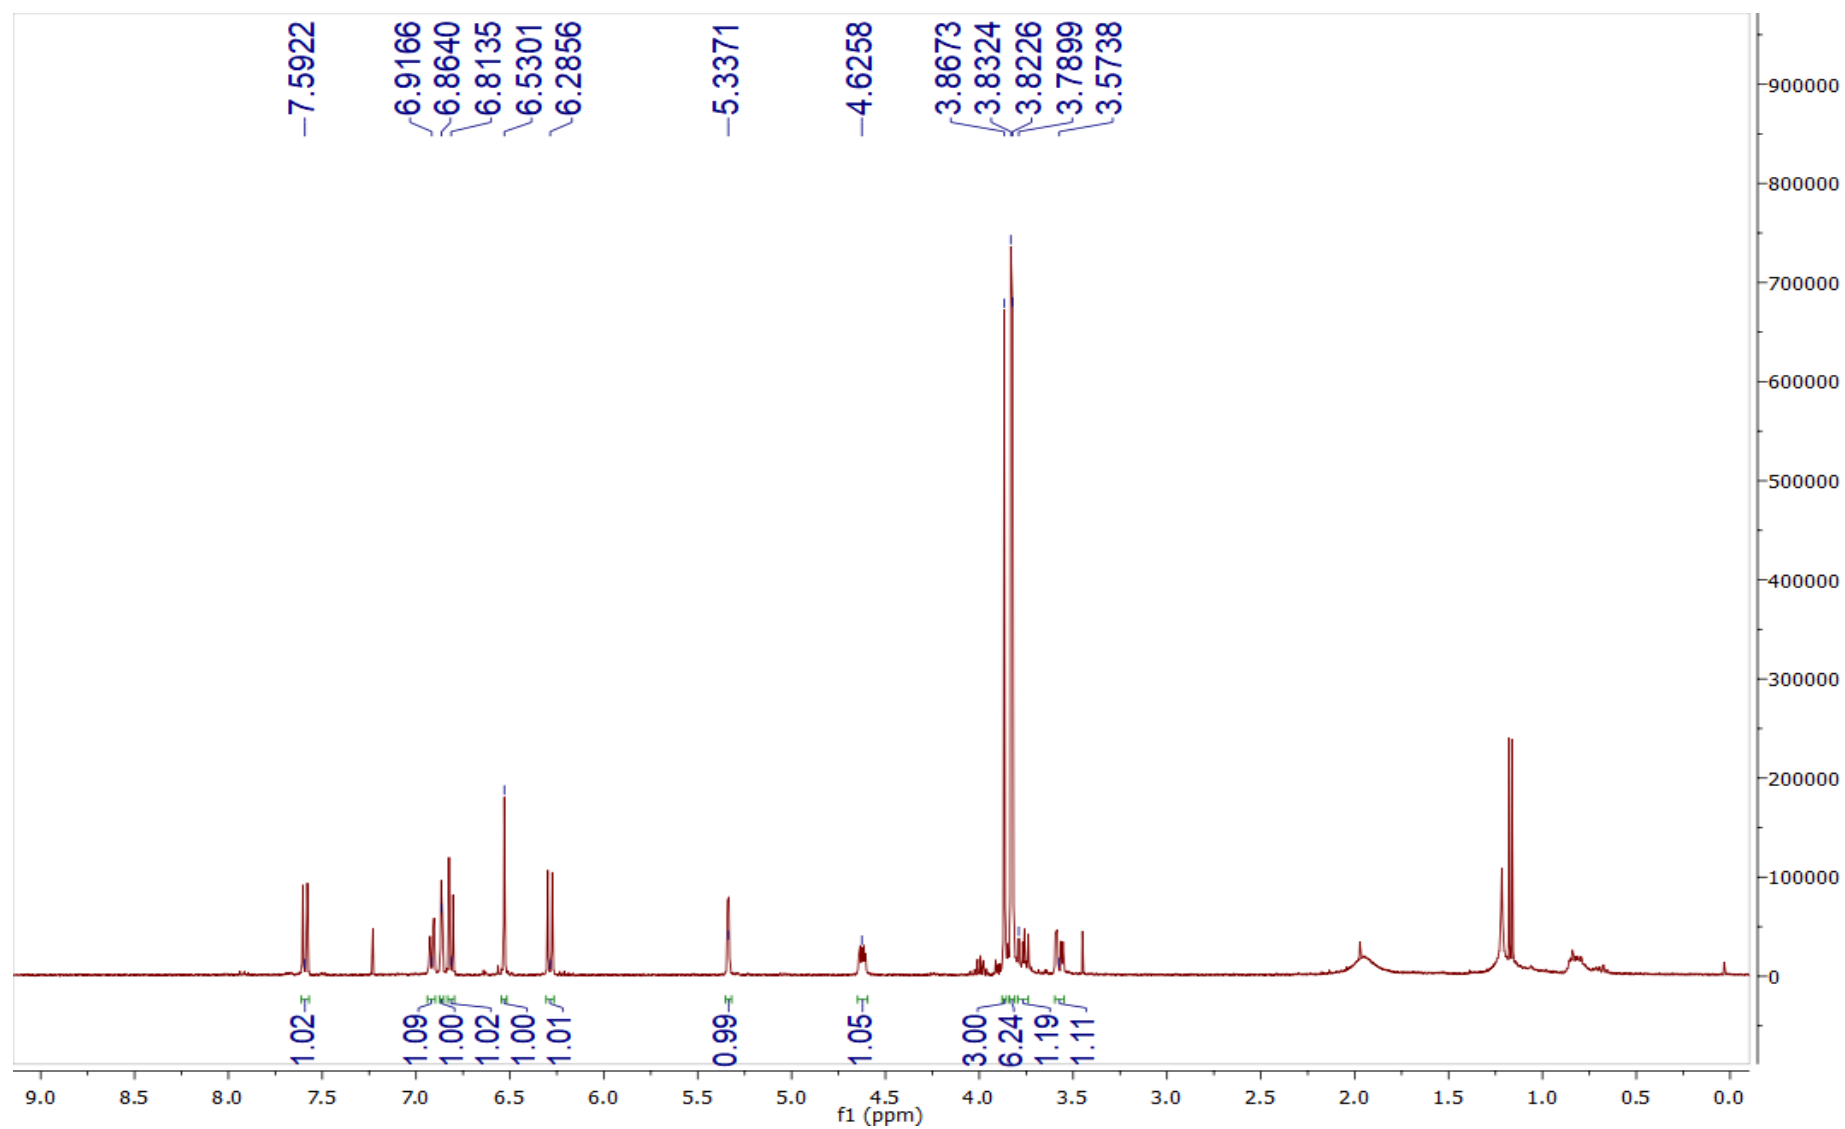

**Figure S55.**  $^1\text{H}$  NMR (400 MHz,  $\text{CDCl}_3$ ) spectrum of the new compound **7**

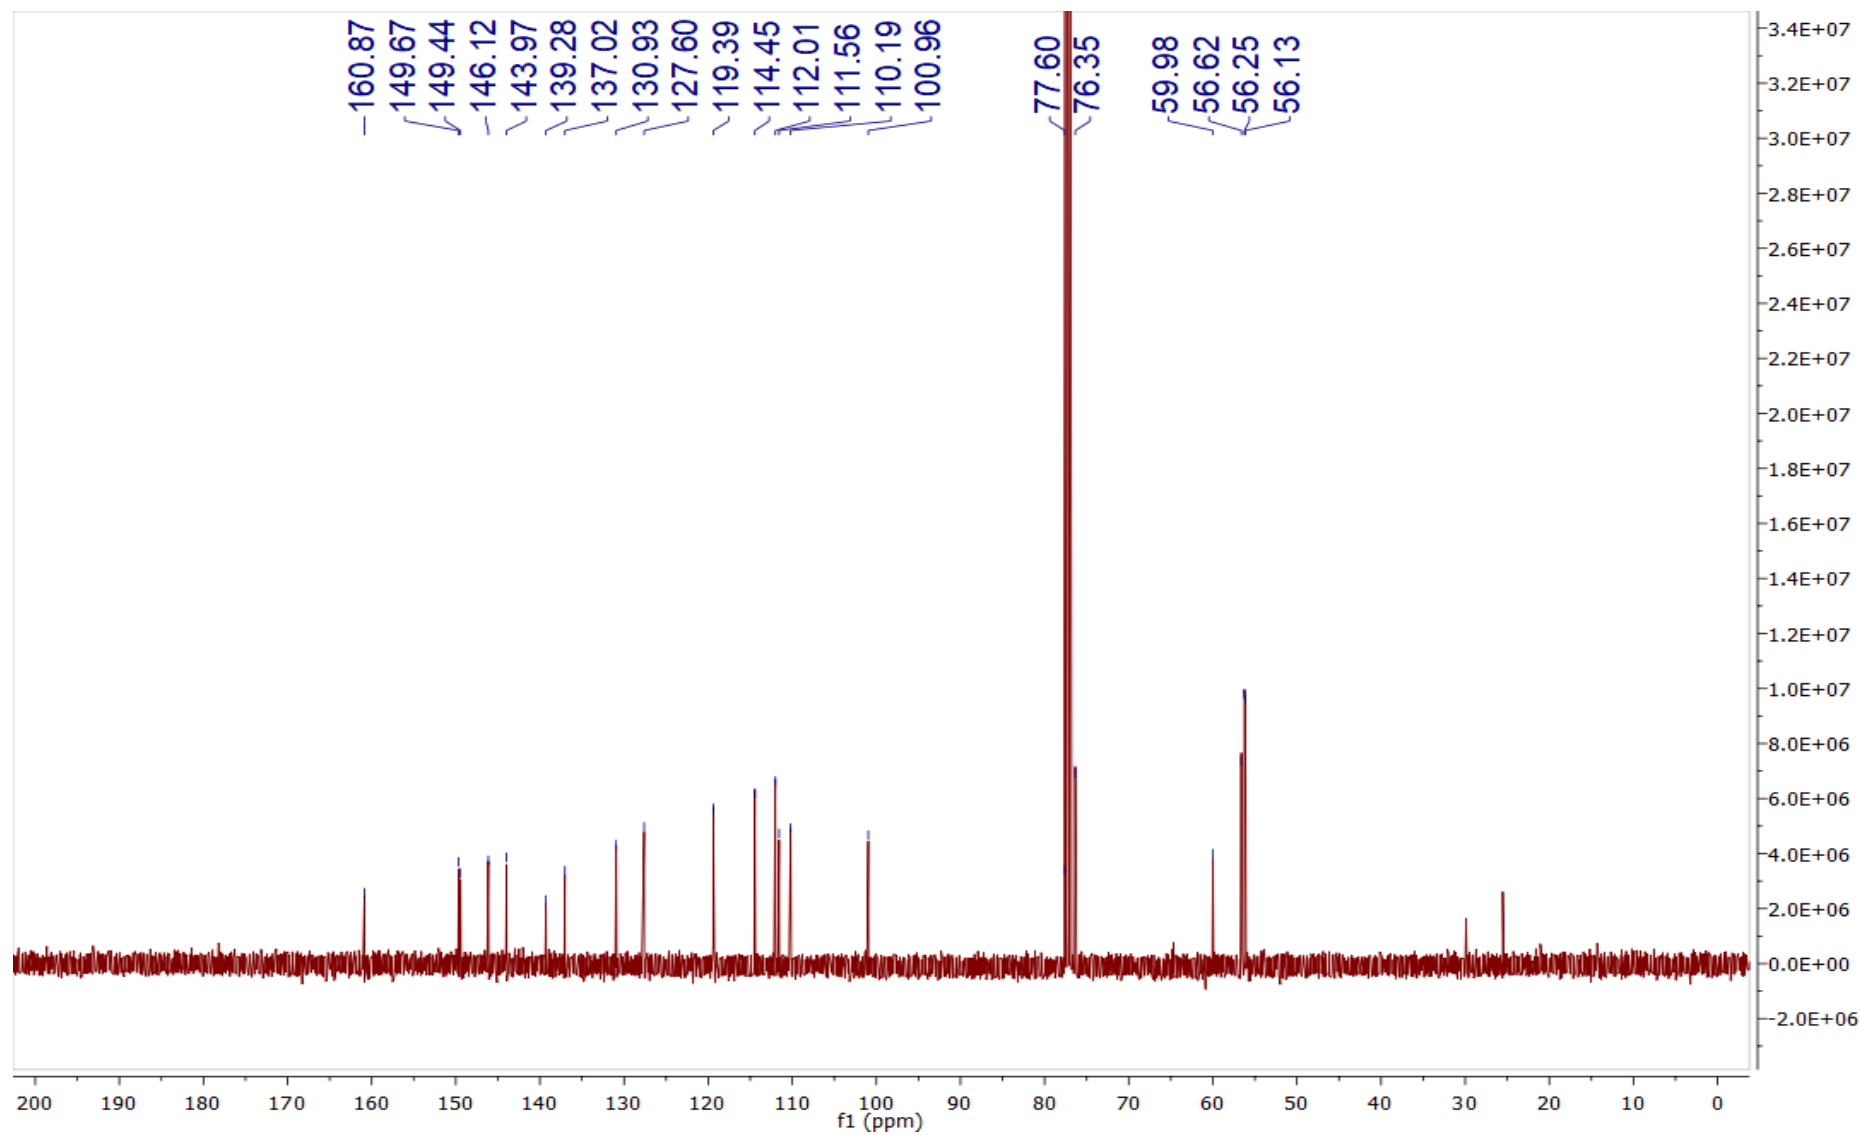

**Figure S56.** <sup>13</sup>C NMR (100 MHz, CDCl<sub>3</sub>) spectrum of the new compound **7**

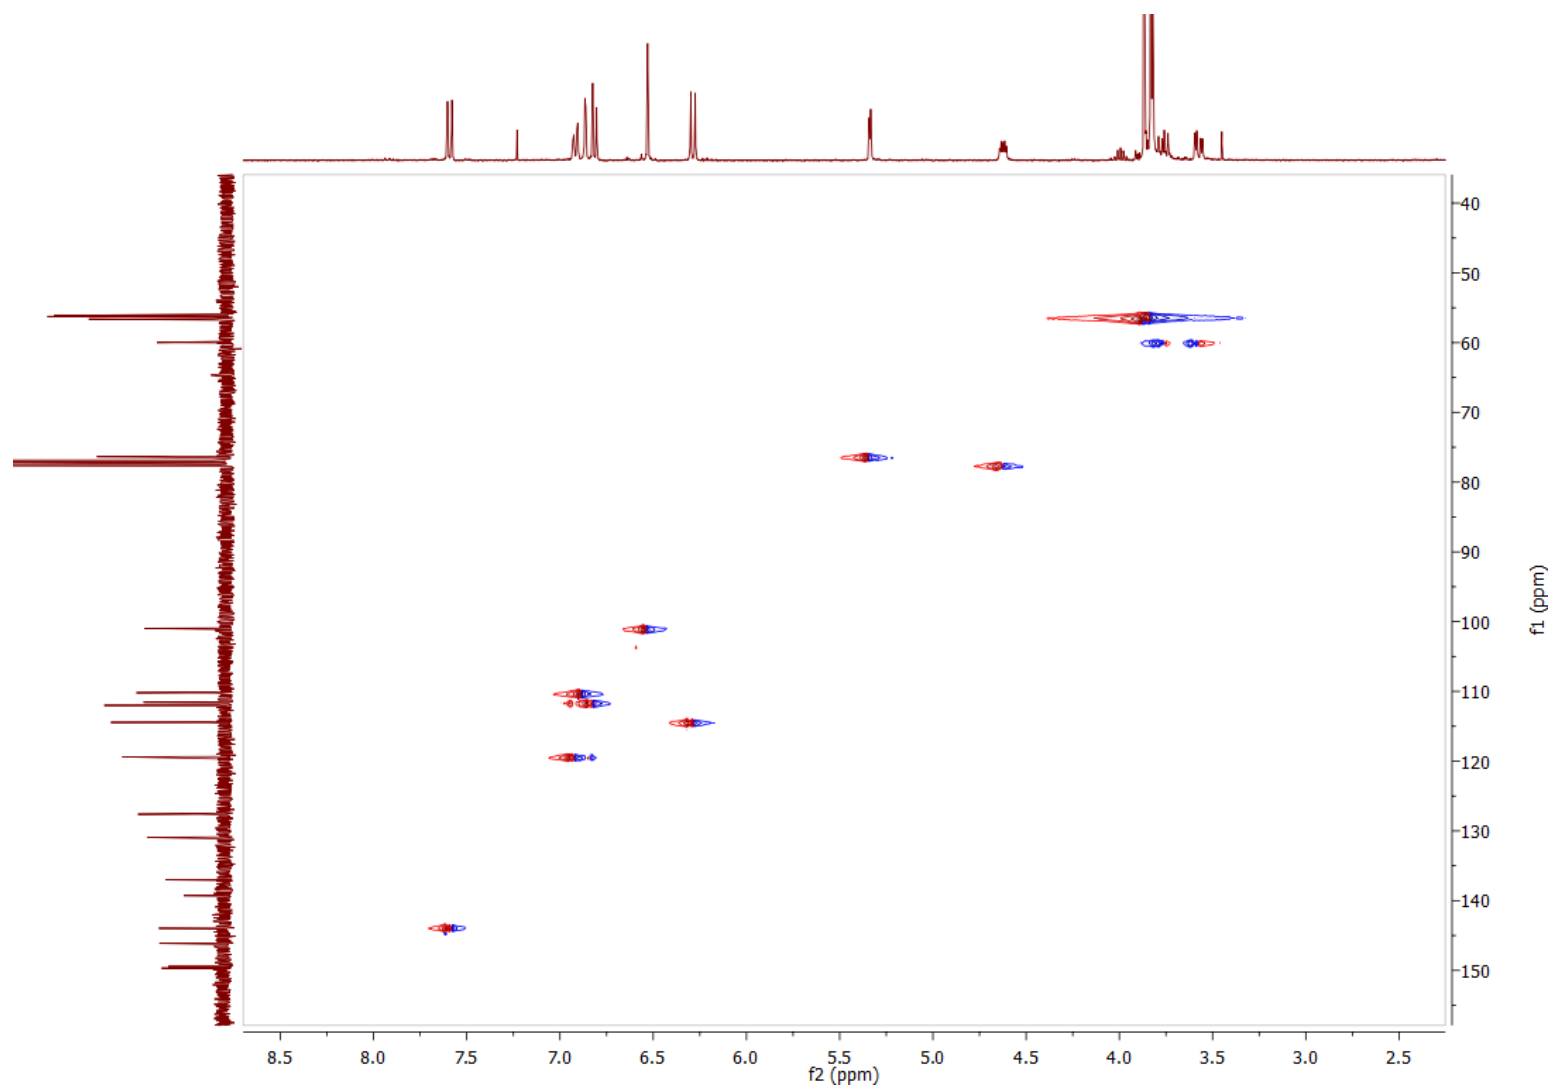

Figure S57. HSQC spectrum of the new compound **7**

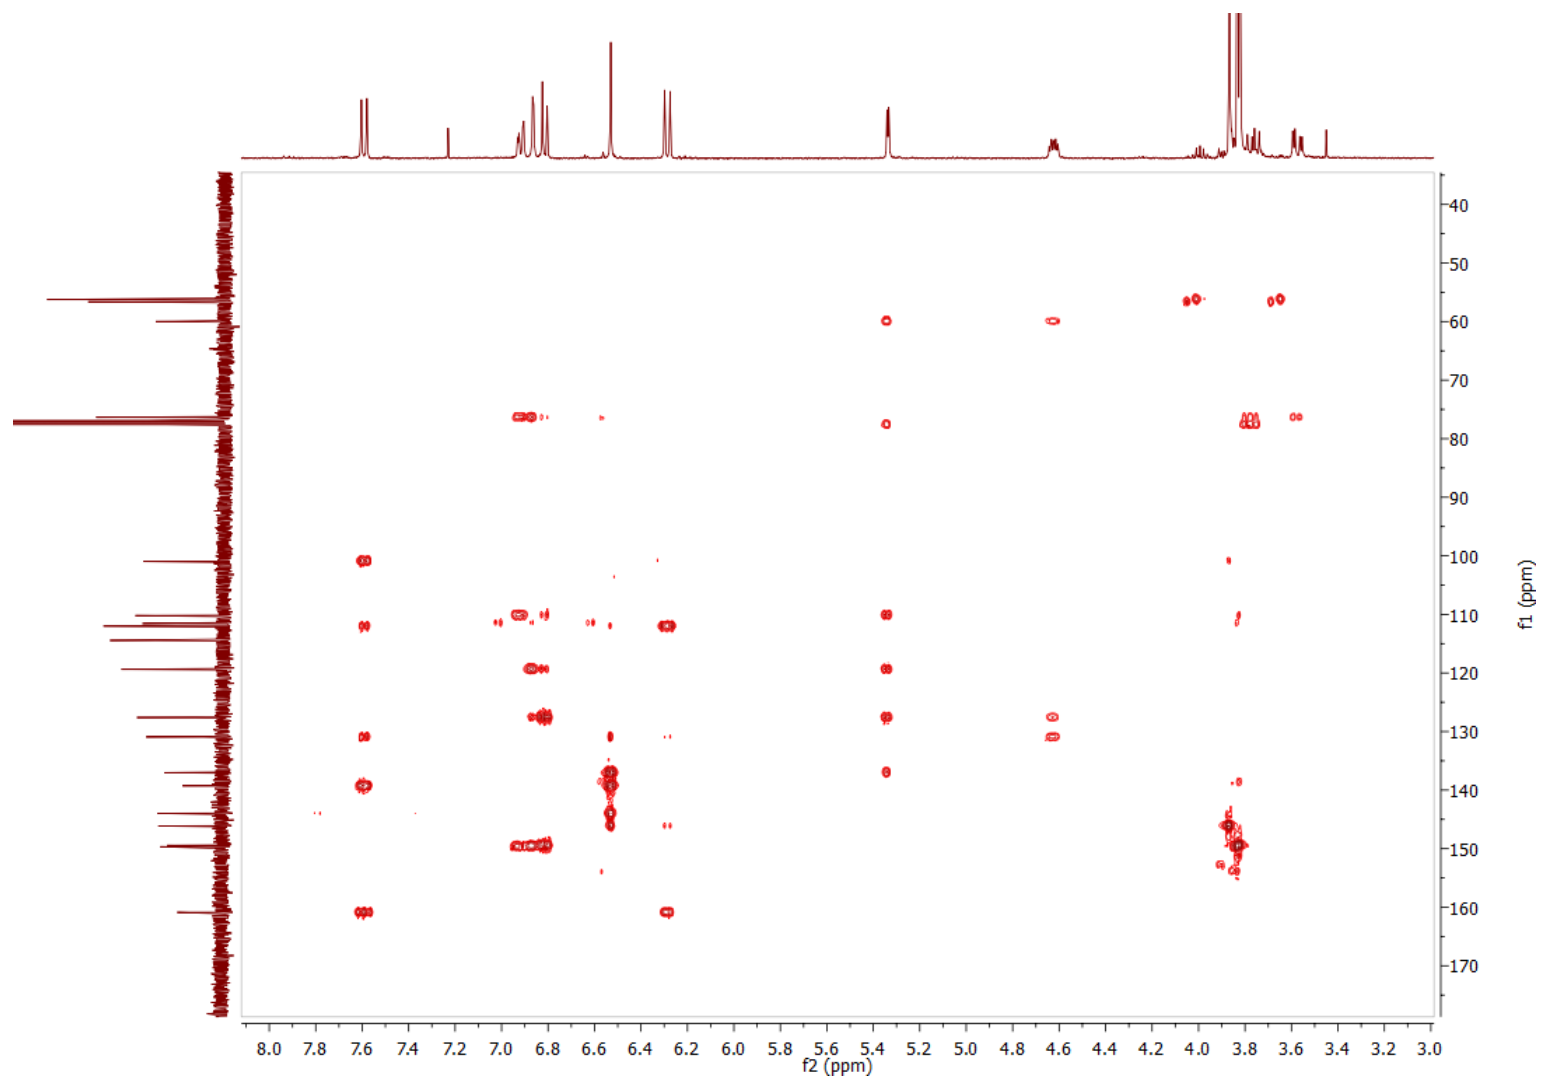

Figure S58. HMBC spectrum of the new compound **7**

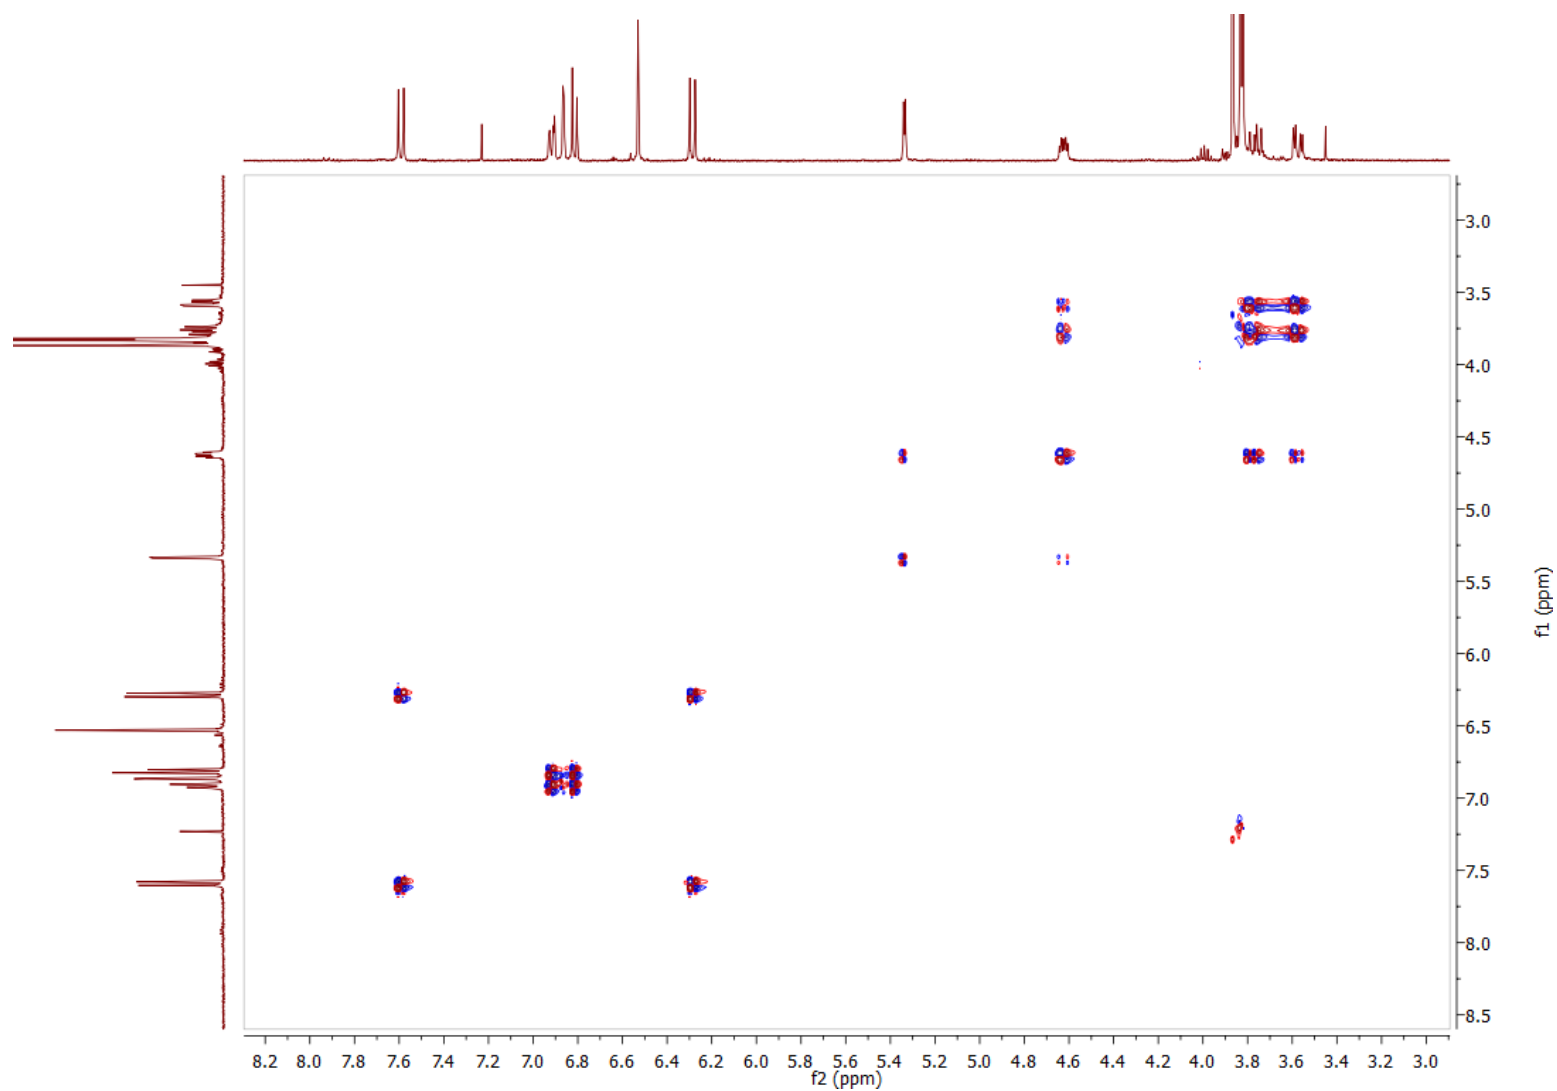

Figure S59. COSY spectrum of the new compound **7**



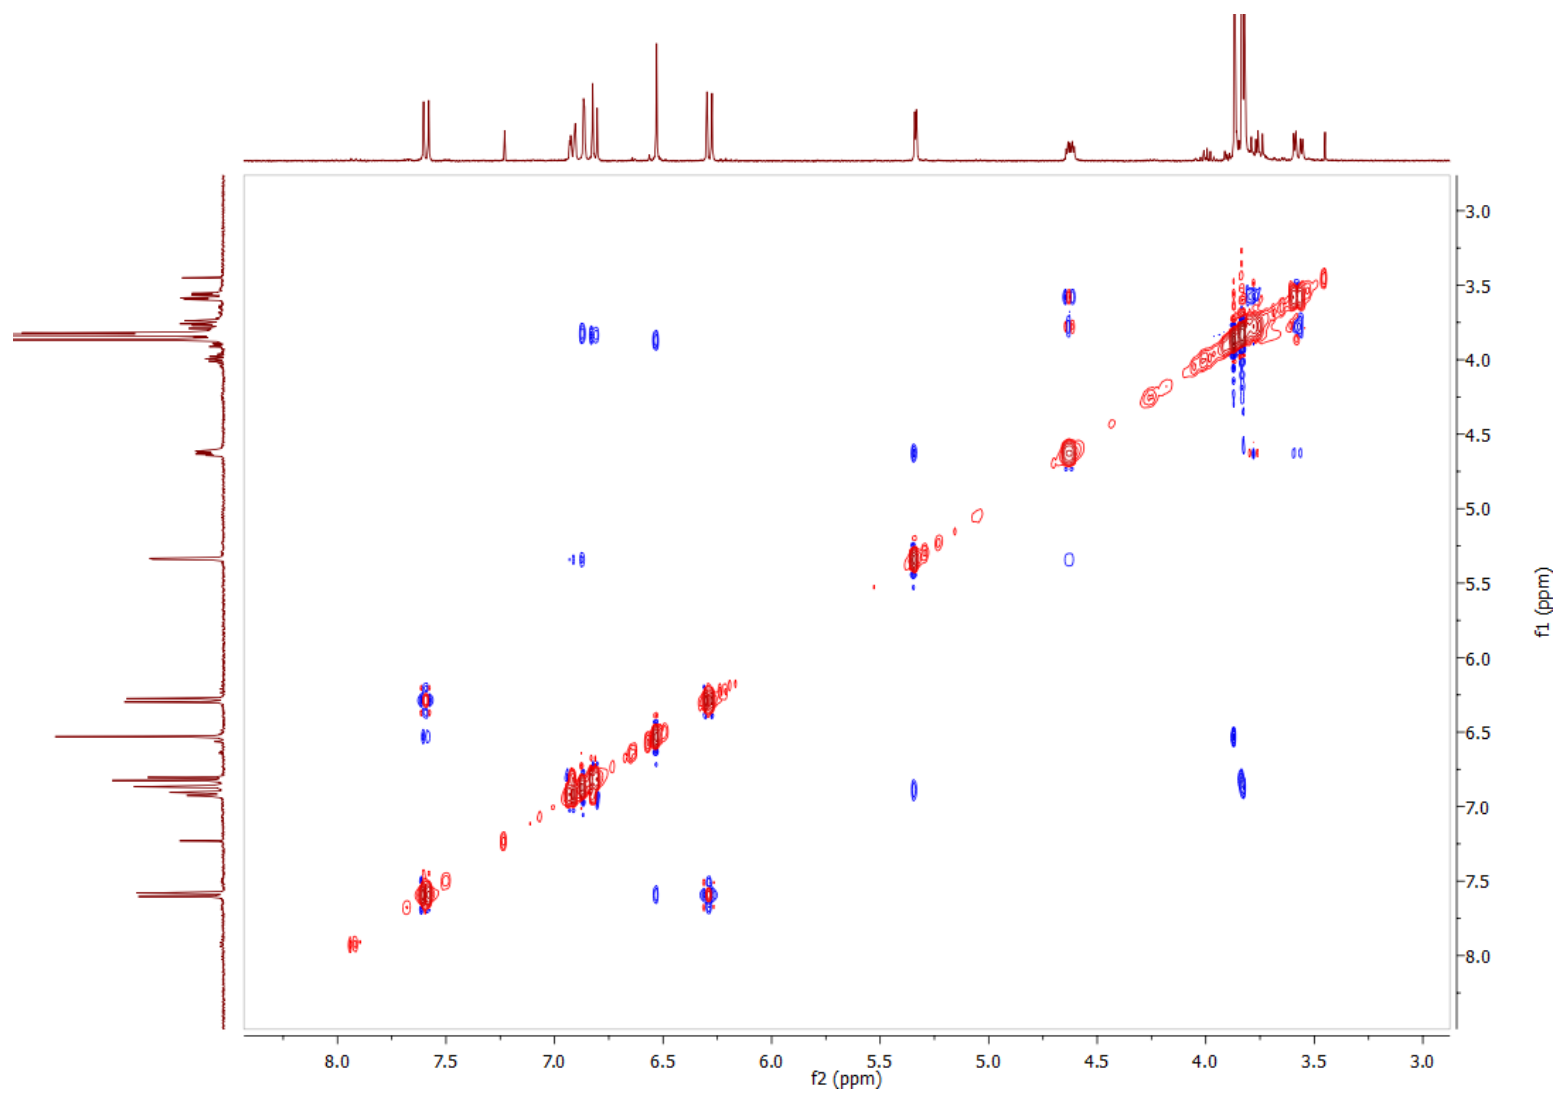

**Figure S60.** NOESY spectrum of the new compound **7**

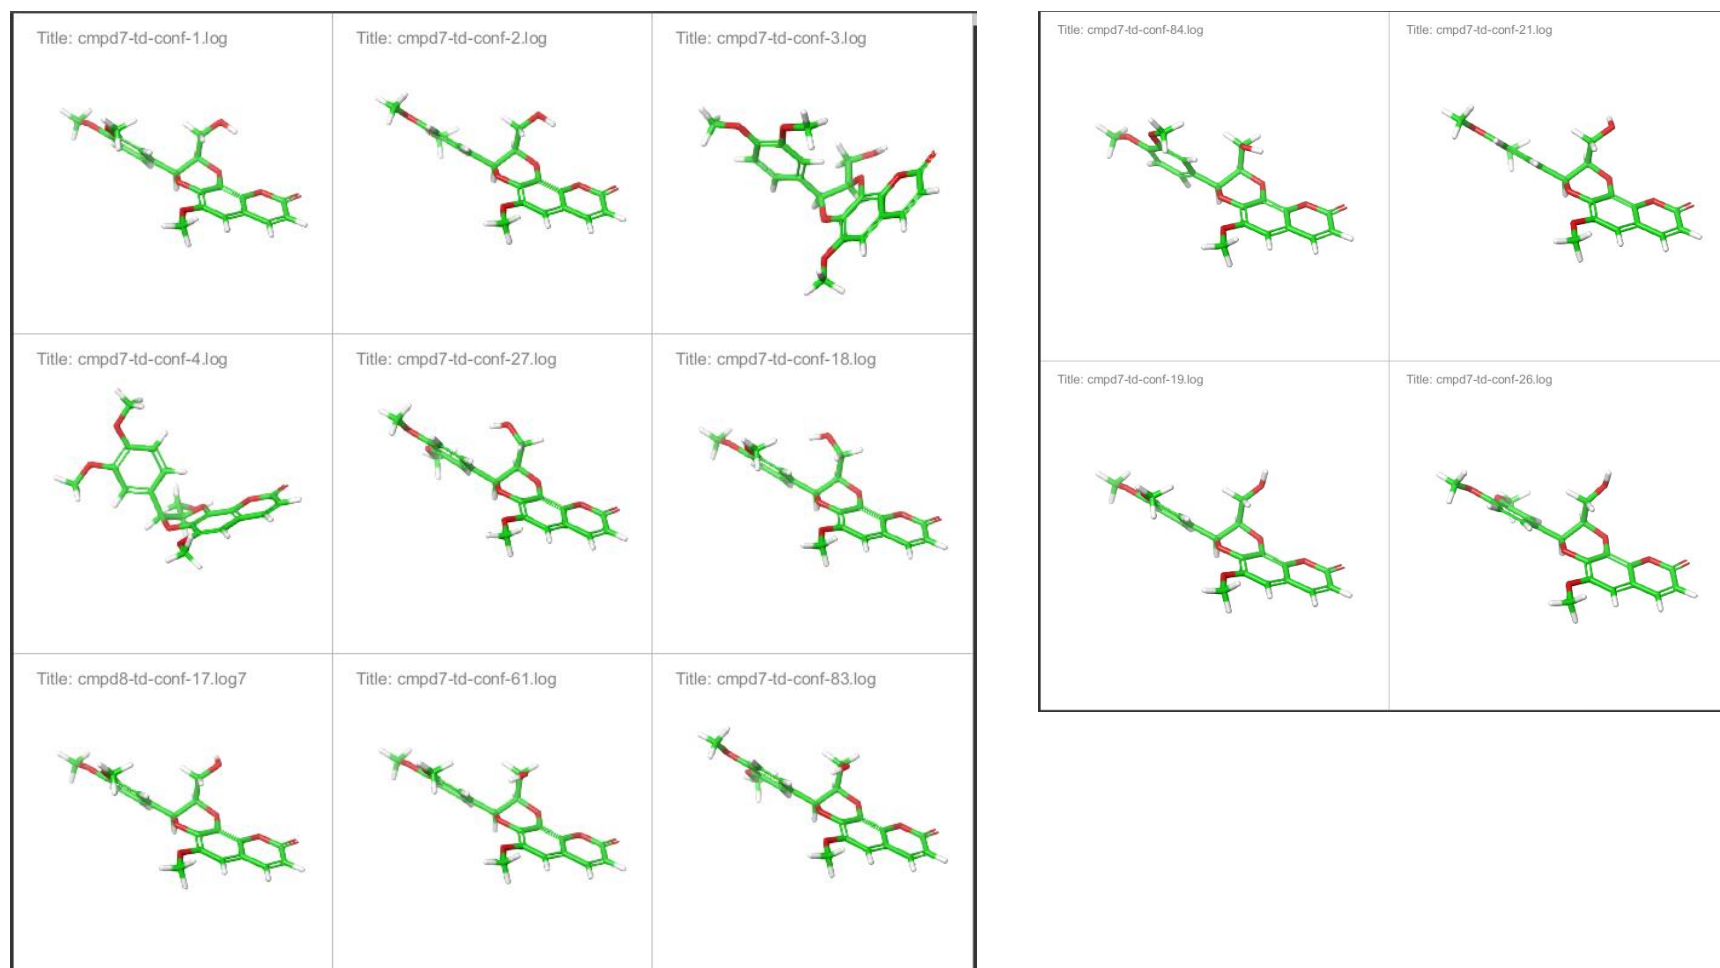

**Figure S61.** Images of conformers (>1%) for the new compound **7**
